# Supplementary material for: Allostery Wiring Map for Kinesin Energy Transduction and Its Evolution
Source: PubMed Central journal article supplement (PMC5076506; doi:10.1074/jbc.m116.733675), 2016-08-08

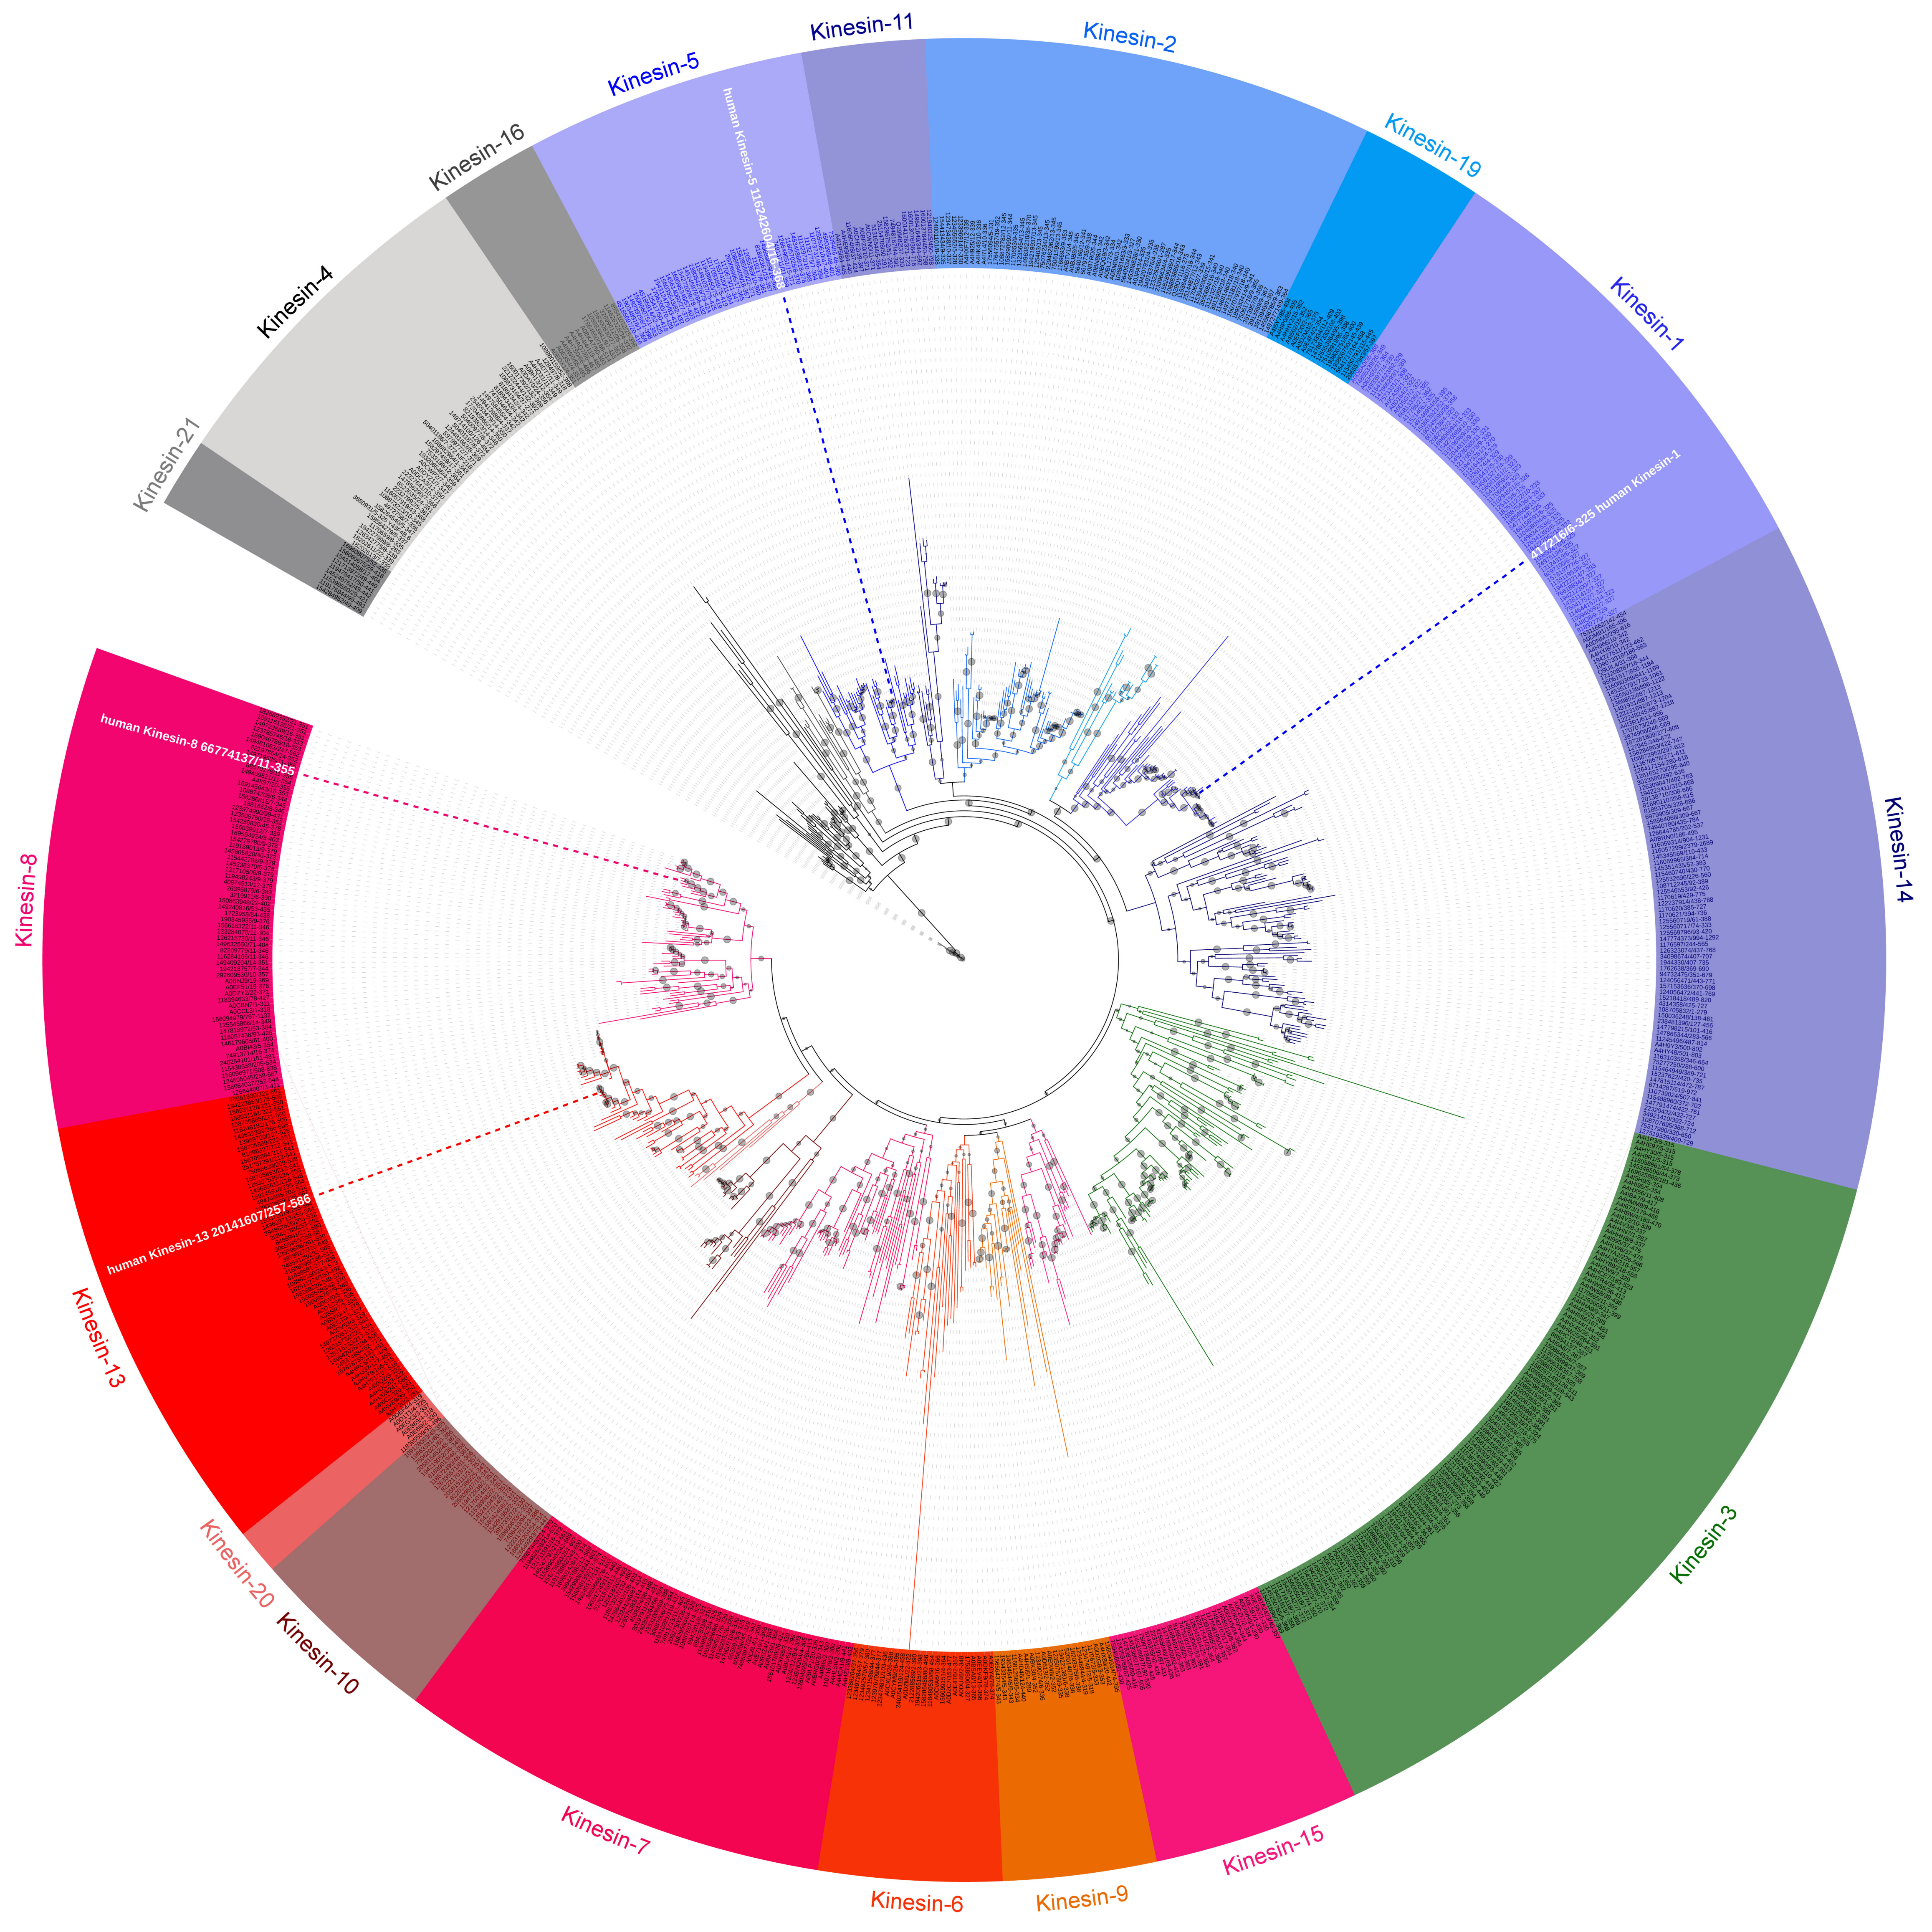

Supplement: supp_M116.733675_SI_File4.pdf [file supp_M116.733675_SI_File4.pdf]
