# Supplementary material for: Allostery Wiring Map for Kinesin Energy Transduction and Its Evolution
Source: PubMed Central journal article supplement (PMC5076506; doi:10.1074/jbc.m116.733675), 2016-08-08
Supplement: supp_M116.733675_Supplement.pdf [file supp_M116.733675_Supplement.pdf]

# SUPPLEMENT FOR ALLOSTERY WIRING MAP FOR KINESIN ENERGY TRANSDUCTION AND ITS EVOLUTION

Jessica Richard, Elizabeth D. Kim, Hoang Nguyen, Catherine D. Kim, and Sunyoung Kim

From the Department of Biochemistry and Molecular Biology, Louisiana State University School of  
Medicine & Health Sciences Center, New Orleans, LA 70112

## LIST OF FILES

**Table S1. SCA has been used to analyze residue coevolution in 39 different protein families.** The protein family analyzed by SCA, the model isoform used to analyze SCA results, the number of sequences in the MSA, and the number of amino acid residues in the model isoform are listed for each publication. We note whether a thermodynamic linkage was demonstrated between co-evolving residues.

**Table S2. Database for 726 kinesin protein sequences analyzed.** Sequences identifiers include NCBI sequence record number (GI), gene ID, and locus name. The table is sorted in alphabetical order by taxa. For each protein sequence, the number of amino acids (aa) in the full-length protein and motor domain residues are listed. Motor type is designated as N-terminal (N), middle (M), or C-terminal (C) to describe location of the motor domain within the full-length protein. References correspond to the sequencing projects or publications.

**Figure S1. SATé produces better resolution in sequence alignments over Clustal.** Portions of the full kinesin motor domain sequence alignment calculated with (A) SATé and (B) Clustal are shown as examples. A single sequence is a representative from each of the indicated kinesin families. Secondary structures are indicated at the top of each portion of the alignment. Gaps correspond to indels in the full sequence alignment.

**Figure S2. Matrices for the energy transduction, MT-binding, and adenine-binding sectors.** An enlarged view of the matrix in Fig 2 that corresponds to the (A) energy transduction, (B), MT-binding, and (C) adenine-binding sectors is provided so that the individual residues comprising each sector can be identified. The residues listed are from human Kinesin-5 as in column 1 of Table 1.

**SI File 1. SATé-generated MSA (.zip file).** The unzipped file is a .fasta file containing the SATé MSA of 726 kinesin motor domain sequences for use in the reader's own analyses. Sequence identifiers are the NCBI GI number and the range of residues reported for the motor domain.

**SI File 2. Annotated Excel file of the SATé-generated MSA (.xlsx file).** This file contains the SATé MSA of 726 kinesin motor domain sequences in annotated format. This file allows cross-referencing of SCA residues to other kinesin sequences or family members. The human kinesin-1, -5, -8, and -13 sequences listed in Table 1 are annotated in column A. NCBI GI numbers for each sequence along with the range of residue numbers reported for the motor domain are provided as sequence identifiers. Kinesin family numbers are assigned for each sequence; the alignment is ordered by kinesin family number. Each position of the alignment is represented in a single cell and the MSA position number is annotated in the top row. SCA positions are indicated by grey highlight and the human Kinesin-5 residue number for each SCA position is listed. The human Kinesin-5 (GI:116242604) sequence is highlighted in blue, as it is the experimental model in the manuscript.

**SI File 3. SATé-generated phylogenetic tree of 726 kinesin motor domain sequences (.zip file).** The unzipped file is a .nex file of the unrooted kinesin phylogeny, determined by SATé. This file is provided for reader's use of our data in their own analyses. As in SI Files 1 and 2, sequence identifiers are the NCBI GI number and the residue range reported for the motor domain. This file also contains the values of all confidence measures as determined by rapid bootstrapping from 1000 replicates.

**SI File 4. Annotated SATé generated phylogeny of 726 kinesin motor domain sequences (.pdf file).** This file of the unrooted kinesin SATé phylogeny in circular representation. Generated from Interactive Tree of Life and downloadable from <http://itol.embl.de/shared/SunyoungKimLab>, this high resolution PDF file allows the reader to enlarge individual clades or branches of interest and examine the individual sequence annotations. In this pdf, families are colored and annotated with kinesin family nomenclature. As in the previous SI files, sequences are identified by their NCBI GI number, and residue range listed is defined by the public databases as to be inclusive of the motor domain; these sequences identifiers are listed along the perimeter of the phylogeny. Guides (dashed grey lines) are provided to visually assist matching individual tree leaves with the corresponding sequence identifier. Human kinesin-1, -5, -8, and -13 sequences, referenced in Table 1 of the main manuscript, are labeled in large white font and the guide lines are colored according to the representative kinesin family. Bootstrap values  $\geq 80\%$  are shown as grey circles on tree branches: smallest circles are 80% confidence measures, whereas the largest circles are 100% confidence values.

**TABLE S1. SCA has been used to analyze residue coevolution in 39 different protein families.** The protein family analyzed by SCA, the model isoform used to analyze SCA results, the number of sequences in the MSA, and the number of amino acid residues in the model isoform are listed for each publication. We note whether a thermodynamic linkage was demonstrated between co-evolving residues.

| Protein family                                  | Model isoform                             | Number of sequences | Number of residues | Demonstrated thermodynamic linkage | Ref  |
|-------------------------------------------------|-------------------------------------------|---------------------|--------------------|------------------------------------|------|
| PDZ                                             | PDZ3 <sup>psd-95</sup>                    | 274                 | 100                | Yes                                | (1)  |
| Class A GPCR                                    | Bovine rhodopsin                          | 940                 | 348                | No                                 | (2)  |
| Globin family (hemoglobin)                      | Human hemoglobin                          | 880                 | 560                | No                                 | (2)  |
| Chymotrypsin family of serine proteases         | Bovine trypsin                            | 616                 | 223                | No                                 | (2)  |
| Guanine nucleotide binding proteins             | Bovine G protein $\alpha$ subunit         | 717                 | 353                | No                                 | (3)  |
| Nuclear hormone receptor ligand binding domain  | Human RXR                                 | 560                 | 462                | No                                 | (4)  |
| S1A family of serine proteases                  | Rat trypsin                               | 1470                | 240                | No                                 | (5)  |
| HSP70/110 chaperones                            | <i>E. coli</i> DnaK                       | 926                 | 605                | No                                 | (6)  |
| Dihydrofolate reductase                         | <i>E. coli</i> DHFR                       | 418                 | 196                | No                                 | (7)  |
| Cyclin dependent kinase inhibitor 2A and cyclin | Human CDKN2A and CDK6                     | 159                 | 427                | No                                 | (8)  |
| WW domain                                       | Nedd4.3                                   | 292                 | 37                 | Yes                                | (9)  |
| WW domain                                       | Nedd4.3                                   | 120                 | 36                 | No                                 | (10) |
| GlycosylPhosphatidylinositol 12                 | <i>L. major</i> GlnNAC deacetylase        |                     | 304                |                                    | (11) |
| HIV-1 proteins (15 different proteins in total) |                                           | 2000                | 23-553             | No                                 | (12) |
| GH1 $\beta$ -glucosidases                       | <i>S. frugiperda</i> $\beta$ -glucosidase | 768                 | 509                | No                                 | (13) |
| Voltage dependent K <sup>+</sup> channels       | Shaker-IR                                 | 360                 | 420                | No                                 | (14) |
| Kinesins                                        |                                           | 242                 | 320                | No                                 | (15) |
| Myosins                                         | <i>Dictyostelium</i> myosin II            | 709                 | 761                | No                                 | (16) |
| Class II prolyl-tRNA synthetases                | <i>E. coli</i> ProRS                      | 492                 | 567                | No                                 | (17) |
| Voltage dependent K <sup>+</sup> channels       | Shaker                                    | 360                 | 420                | No                                 | (18) |
| Antigen 85C in esterase                         | <i>M. tuberculosis</i> ag85C              | 846                 | 121                | No                                 | (19) |
| Arsenic repressor                               | <i>S. aureus</i> CzrA                     | 3000                | 140                | No                                 | (20) |
| ATP-binding cassette transporter family         | Human CFTR                                | 493                 | 1480               | No                                 | (21) |
| Thiamine pyrophosphate-dependent enzymes        | <i>E. coli</i> transketolase              | 382                 | 680                | No                                 | (22) |
| Aspartokinase family                            | <i>C. glutamicum</i> aspartokinase        | 500                 | 160                | No                                 | (23) |
| FtsZ                                            | <i>M. jannaschii</i> FtsZ                 | 223                 | 350                | No                                 | (24) |
| Protein kinases                                 | Human Pak2                                | 482                 | 250                | No                                 | (25) |
| Protein kinases                                 | cAMP-dependent protein                    | 1112                | 223                | No                                 | (26) |
| Leucyl-tRNA synthetase                          | <i>T. thermophilus</i> leuRS              | 484                 | 876                | No                                 | (27) |
| Aspartic proteinase                             | <i>T. reesei</i> trichodermapepsin        | 1207                | 329                | No                                 | (28) |
| Ubiquitin-conjugating enzyme (E2)               | UbcH5b                                    | 345                 | 147                | No                                 | (29) |
| DNA cytosine C <sup>5</sup> methyltransferases  | M.HhaI                                    | 389                 | 327                | No                                 | (30) |
| Per/Arnt/Sim (PAS) family                       | <i>A. sativa</i> LOV2                     | 1104                | 146                | No                                 | (31) |
| Dihydrofolate reductase                         | <i>E. coli</i> DHFR                       | 418                 | 159                | No                                 | (31) |
| Rhodopsin-like receptors (Class A GPCRs)        | Human CXCR4                               | 717                 | 320                | No                                 | (32) |
| Plant peroxidases                               | Royal palm tree peroxidase                | 393                 | 323                | No                                 | (33) |
| GroEL chaperonin                                |                                           | 499                 | 587                | No                                 | (34) |
| GroES cochaperonin                              |                                           | 487                 | 139                | No                                 | (34) |
| Membrane proteins                               |                                           |                     |                    | No                                 | (35) |

**TABLE S2. Database for 726 kinesin protein sequences analyzed.** Sequence identifiers include NCBI sequence record number (GI), gene ID, and locus name. The table is sorted in alphabetical order by taxa. For each protein sequence, the number of amino acids (aa) in the full-length protein and motor domain residues are listed. Motor type is designated as N-terminal (N), middle (M), or C-terminal (C) to describe location of the motor domain within the full-length protein. References correspond to the sequencing projects or publications.

| GI        | Gene ID    | NCBI Prot ID | Protein Name                | Taxa                 | No. aa in full length protein | Motor type (N/M/C) | Motor domain | Ref. |
|-----------|------------|--------------|-----------------------------|----------------------|-------------------------------|--------------------|--------------|------|
| 108869408 | AAEL014084 | EAT33633     | Eg5                         | <i>A. aegypti</i>    | 1040                          | N                  | 18-366       | (36) |
| 108872782 | AAEL010942 | EAT37007     | KIF3A                       | <i>A. aegypti</i>    | 678                           | N                  | 11-353       | (36) |
| 108872952 | AAEL010803 | EAT37177     | Ncd                         | <i>A. aegypti</i>    | 637                           | C                  | 297-628      | (36) |
| 108873164 | AAEL010619 | EAT37389     | putative protein            | <i>A. aegypti</i>    | 1044                          | N                  | 2-282        | (36) |
| 108873223 | AAEL010568 | EAT37448     | KIF4A                       | <i>A. aegypti</i>    | 1173                          | N                  | 8-352        | (36) |
| 108874708 | AAEL009227 | EAT38933     | kinesin heavy chain         | <i>A. aegypti</i>    | 896                           | N                  | 4-352        | (36) |
| 108875071 | AAEL008890 | EAT39296     | kinesin heavy chain         | <i>A. aegypti</i>    | 588                           | N                  | 2-333        | (36) |
| 108875436 | AAEL008542 | EAT39661     | kinesin heavy chain subunit | <i>A. aegypti</i>    | 931                           | N                  | 3-295        | (36) |
| 108880159 | AAEL004241 | EAT44384     | kinesin heavy chain         | <i>A. aegypti</i>    | 397                           | N                  | 51-375       | (36) |
| 108880160 | AAEL004235 | EAT44385     | Klp10A                      | <i>A. aegypti</i>    | 718                           | M                  | 241-581      | (36) |
| 108881536 | AAEL002987 | EAT45761     | kinesin heavy chain         | <i>A. aegypti</i>    | 1252                          | N                  | 5-352        | (36) |
| 108881663 | AAEL002877 | EAT45888     | KIF 17                      | <i>A. aegypti</i>    | 572                           | N                  | 2-341        | (36) |
| 108882659 | AAEL001986 | EAT46884     | KIF 1B                      | <i>A. aegypti</i>    | 1151                          | M                  | 168-544      | (36) |
| 108882984 | AAEL001648 | EAT47209     | kinesin family member 21    | <i>A. aegypti</i>    | 1006                          | N                  | 1-350        | (36) |
| 108883110 | AAEL001582 | EAT47335     | kinesin                     | <i>A. aegypti</i>    | 1788                          | N                  | 1-311        | (36) |
| 108883886 | AAEL000822 | EAT48111     | KLP 68D                     | <i>A. aegypti</i>    | 788                           | N                  | 15-351       | (36) |
| 108883941 | AAEL000773 | EAT48166     | kinesin heavy chain         | <i>A. aegypti</i>    | 698                           | N                  | 95-443       | (36) |
| 122068686 | 5565492    | Q17BU3       | Kif 1A                      | <i>A. aegypti</i>    | 1644                          | N                  | 2-358        | (36) |
| 154270889 | HCAG_08619 | XP_001536298 | kinesin heavy chain         | <i>A. capsulatus</i> | 958                           | N                  | 9-342        | (37) |
| 154272009 | HCAG_07966 | XP_001536857 | putative protein            | <i>A. capsulatus</i> | 1174                          | N                  | 77-422       | (37) |
| 154277914 | HCAG_05255 | XP_001539788 | putative protein            | <i>A. capsulatus</i> | 812                           | N                  | 2-388        | (37) |
| 154278860 | HCAG_04083 | XP_001540243 | putative protein            | <i>A. capsulatus</i> | 1035                          | M                  | 249-614      | (37) |
| 154279780 | HCAG_04543 | XP_001540703 | putative protein            | <i>A. capsulatus</i> | 999                           | N                  | 7-386        | (37) |
| 154283097 | HCAG_02515 | XP_001542344 | putative protein            | <i>A. capsulatus</i> | 598                           | N                  | 45-392       | (37) |
| 154284868 | HCAG_00275 | XP_001543229 | putative protein            | <i>A. capsulatus</i> | 1674                          | N                  | 6-373        | (37) |
| 154284952 | HCAG_00317 | XP_001543271 | putative protein            | <i>A. capsulatus</i> | 1740                          | N                  | 48-423       | (37) |
| 158284540 | XM_307305  | XP_307305    | AGAP012471-PA               | <i>A. gambiae</i>    | 683                           | N                  | 5-347        | (38) |
| 158284863 | XM_307936  | XP_307936    | AGAP002248-PA               | <i>A. gambiae</i>    | 762                           | C                  | 422-747      | (39) |
| 158285385 |            | XP_308280    | AGAP007592-PA               | <i>A. gambiae</i>    | 1944                          | N                  | 3-356        | (39) |
| 158285565 | XM_308374  | XP_308374    | AGAP007502-PA               | <i>A. gambiae</i>    | 1092                          | N                  | 22-371       | (39) |
| 158286488 | XM_308782  | XP_308782    | AGAP006989-PA               | <i>A. gambiae</i>    | 632                           | N                  | 80-466       | (39) |
| 158286815 | XM_308943  | XP_308943    | AGAP006803-PA               | <i>A. gambiae</i>    | 937                           | N                  | 7-345        | (39) |
| 158289228 | XM_310979  | XP_310979    | AGAP000159-PA               | <i>A. gambiae</i>    | 725                           | M                  | 249-579      | (39) |
| 158289936 | XM_311552  | XP_311552    | AGAP010396-PA               | <i>A. gambiae</i>    | 781                           | N                  | 17-344       | (39) |
| 158290992 | XM_312517  | XP_312517    | AGAP002427-PA               | <i>A. gambiae</i>    | 647                           | N                  | 11-344       | (39) |
| 158295904 | XM_557151  | XP_557151    | AGAP006472-PA               | <i>A. gambiae</i>    | 2261                          | N                  | 4-328        | (39) |
| 158296752 | XM_317097  | XP_317097    | AGAP008357-PA               | <i>A. gambiae</i>    | 1054                          | N                  | 51-292       | (39) |
| 158297149 | XM_317425  | XP_317425    | AGAP008035-PA               | <i>A. gambiae</i>    | 972                           | M                  | 126-511      | (39) |

| GI        | Gene ID    | NCBI Prot ID | Protein Name                                      | Taxa                  | No. aa in full length protein | Motor type (N/M/C) | Motor domain | Ref. |
|-----------|------------|--------------|---------------------------------------------------|-----------------------|-------------------------------|--------------------|--------------|------|
| 158297459 | XM_317685  | XP_317685    | AGAP007815-PA                                     | <i>A. gambiae</i>     | 1033                          | N                  | 17-361       | (39) |
| 158298183 | XM_318377  | XP_318377    | AGAP003925-PA                                     | <i>A. gambiae</i>     | 1268                          | N                  | 2-365        | (39) |
| 158300830 | XM_320651  | XP_320651    | AGAP011874-PA                                     | <i>A. gambiae</i>     | 627                           | N                  | 27-361       | (39) |
| 158563989 | 1275256    | Q7PHR1       | Kif1A                                             | <i>A. gambiae</i>     | 1644                          | N                  | 2-358        | (39) |
| 110294501 |            | ABG66709     | kinesin heavy chain 1                             | <i>A. californica</i> | 979                           | N                  | 6-326        | (40) |
| 1170619   | 827876     | Q07970       | Atk 1                                             | <i>A. thaliana</i>    | 793                           | C                  | 429-775      | (41) |
| 1170620   | 828826     | P46864       | Atk 2                                             | <i>A. thaliana</i>    | 745                           | C                  | 385-727      | (42) |
| 1170621   | 835556     | P46875       | Atk 3                                             | <i>A. thaliana</i>    | 754                           | C                  | 394-736      | (43) |
| 4314358   | AC006340   | AAD15569     | putative kinesin heavy chain                      | <i>A. thaliana</i>    | 1068                          | M                  | 425-727      | (44) |
| 4539324   | AL035679   | CAB38825     | kinesin 4539324                                   | <i>A. thaliana</i>    | 1121                          | N                  | 98-488       | (45) |
| 4580395   | AC007171   | AAD24373     | putative kinesin-like spindle protein             | <i>A. thaliana</i>    | 1076                          | N                  | 48-401       | (44) |
| 5541717   | ATF28P10   | CAB41097     | kinesin 4678306                                   | <i>A. thaliana</i>    | 1070                          | M                  | 164-458      | (46) |
| 6056206   | ATAC009400 | AAF02823     | putative kinesin-like centromere protein          | <i>A. thaliana</i>    | 459                           | N                  | 45-329       | (46) |
| 6523035   | AL132976   | CAB62303     | kinesin 6523035                                   | <i>A. thaliana</i>    | 1075                          | N                  | 24-381       | (46) |
| 6526975   | AB028468   | BAA88112     | kinesin 6526975                                   | <i>A. thaliana</i>    | 823                           | N                  | 3-325        | (47) |
| 6714287   | AC013354   | AAF25983     | F15H18.10                                         | <i>A. thaliana</i>    | 1162                          | M                  | 619-972      | (48) |
| 7339486   | AL162459   | CAB82809     | kinesin                                           | <i>A. thaliana</i>    | 1058                          | N                  | 46-399       | (46) |
| 7406433   | AL162874   | CAB85542     | kinesin 7406433                                   | <i>A. thaliana</i>    | 664                           | N                  | 94-397       | (49) |
| 7573331   | AL163818   | CAB87801     | kinesin heavy chain-like protein                  | <i>A. thaliana</i>    | 439                           | N                  | 1-308        | (46) |
| 7594566   | AL163975   | CAB88133     | kinesin 7594566                                   | <i>A. thaliana</i>    | 1229                          | N                  | 92-430       | (46) |
| 8745335   | AF193768   | AAF78894     | phragmoplast-associated kinesin-related protein 1 | <i>A. thaliana</i>    | 1292                          | N                  | 92-426       | (50) |
| 11132972  | 818192     | P82266       | K125                                              | <i>A. thaliana</i>    | 1056                          | N                  | 10-368       | (44) |
| 15218418  | NM_105884  | NP_177370    | kinesin                                           | <i>A. thaliana</i>    | 1195                          | M                  | 489-820      | (48) |
| 15237622  | NM_123496  | NP_198947    | kinesin                                           | <i>A. thaliana</i>    | 961                           | M                  | 420-735      | (49) |
| 20197911  | AC006841   | AAD23684     | AC006841_14 putative kinesin heavy chain          | <i>A. thaliana</i>    | 1058                          | N                  | 104-421      | (44) |
| 22327641  | NM_124156  | NP_199593    | FRA1                                              | <i>A. thaliana</i>    | 1035                          | N                  | 10-371       | (49) |
| 22327992  | NM_125486  | NP_200901    | putative kinesin                                  | <i>A. thaliana</i>    | 1294                          | N                  | 5-361        | (49) |
| 22329432  | T12M4.14   | NP_172389    | kinesin                                           | <i>A. thaliana</i>    | 1010                          | M                  | 432-727      | (48) |
| 22331006  | NM_112036  | NP_187809    | kinesin                                           | <i>A. thaliana</i>    | 1030                          | N                  | 69-388       | (49) |
| 22331291  | NM_113271  | NP_189009    | kinesin 12B                                       | <i>A. thaliana</i>    | 1313                          | N                  | 97-431       | (46) |
| 30687506  | NM_102022  | NP_173592    | kinesin (MKRP1)                                   | <i>A. thaliana</i>    | 890                           | N                  | 75-394       | (48) |
| 34921410  | F2P16.12   | O81635       | Atk 4                                             | <i>A. thaliana</i>    | 987                           | M                  | 392-724      | (49) |
| 42565046  | NM_112906  | NP_188650    | kinesin 42565046                                  | <i>A. thaliana</i>    | 1114                          | M                  | 103-436      | (46) |
| 75097784  | dl13115c   | O23274       | kinesin                                           | <i>A. thaliana</i>    | 1662                          | N                  | 20-425       | (45) |
| 75173334  | 837799     | Q9FZ06       | Ark 3                                             | <i>A. thaliana</i>    | 919                           | M                  | 112-409      | (51) |
| 75277250  | T32N15.10  | O22240       | putative kinesin                                  | <i>A. thaliana</i>    | 767                           | M                  | 288-600      | (49) |
| 75311662  | 830911     | Q9LX99       | GRIMP                                             | <i>A. thaliana</i>    | 1273                          | M                  | 142-454      | (52) |
| 75317980  | At2g47500  | O22260       | putative kinesin heavy chain                      | <i>A. thaliana</i>    | 861                           | M                  | 330-650      | (44) |
| 110737312 | At2g37420  | BAF00602     | putative kinesin heavy chain                      | <i>A. thaliana</i>    | 1039                          | N                  | 46-399       | (53) |
| 110739024 | At1g73860  | BAF01431     | kinesin                                           | <i>A. thaliana</i>    | 1025                          | M                  | 507-846      | (53) |
| 145338627 | NM_112614  | NP_188362    | POK1                                              | <i>A. thaliana</i>    | 2066                          | M                  | 167-505      | (46) |
| 145338697 | NM_112791  | NP_188535    | POK2                                              | <i>A. thaliana</i>    | 2771                          | M                  | 192-530      | (46) |
| 186525204 | NM_122296  | NP_197779    | ATP binding / MT motor                            | <i>A. thaliana</i>    | 739                           | N                  | 54-314       | (49) |
| 193806750 | At3g54870  | Q9SV36       | Ark 1                                             | <i>A. thaliana</i>    | 1051                          | M                  | 145-439      | (51) |
| 193806751 | 839306     | Q9LPC6       | Ark 2                                             | <i>A. thaliana</i>    | 894                           | N                  | 60-400       | (51) |
| 238481396 | NM_122637  | NP_198107    | ATP binding / MTmotor                             | <i>A. thaliana</i>    | 762                           | M                  | 127-456      | (49) |

| GI        | Gene ID       | NCBI Prot ID | Protein Name                              | Taxa                 | No. aa in full length protein | Motor type (N/M/C) | Motor domain | Ref. |
|-----------|---------------|--------------|-------------------------------------------|----------------------|-------------------------------|--------------------|--------------|------|
| 240254101 | NM_101713     | NP_173290    | ATP binding / MT motor                    | <i>A. thaliana</i>   | 725                           | M                  | 151-481      | (48) |
| 240254119 | NM_101860     | NP_173434    | ATP binding / MT motor                    | <i>A. thaliana</i>   | 970                           | M                  | 124-458      | (48) |
| 240256264 | NM_120750     | NP_196285    | ATP binding / MT motor                    | <i>A. thaliana</i>   | 986                           | N                  | 66-394       | (49) |
| 51701679  | 4619679       | Q8J1G1       | Kip 2                                     | <i>A. gossypii</i>   | 685                           | M                  | 113-446      | (54) |
| 45185914  | 4619762       | NP_983630    | ACR228Cp                                  | <i>A. gossypii</i>   | 1129                          | N                  | 52-425       | (54) |
| 121700144 | ACLA_086080   | XP_001268337 | kinesin                                   | <i>A. clavatus</i>   | 649                           | N                  | 2-343        | (55) |
| 121700378 | ACLA_087330   | XP_001268454 | kinesin heavy chain subunit               | <i>A. clavatus</i>   | 929                           | N                  | 9-330        | (55) |
| 121709389 | ACLA_066170   | XP_001272407 | kinesin (BimC)                            | <i>A. clavatus</i>   | 1189                          | N                  | 75-419       | (55) |
| 121710506 | ACLA_091410   | XP_001272869 | kinesin                                   | <i>A. clavatus</i>   | 1007                          | N                  | 9-379        | (55) |
| 121711191 | ACLA_005380   | XP_001273211 | kinesin (KipA)                            | <i>A. clavatus</i>   | 762                           | N                  | 16-372       | (55) |
| 121713944 | ACLA_016030   | XP_001274583 | kinesin                                   | <i>A. clavatus</i>   | 655                           | N                  | 92-449       | (55) |
| 121713972 | ACLA_016170   | XP_001274597 | kinesin                                   | <i>A. clavatus</i>   | 1748                          | N                  | 49-440       | (55) |
| 121716118 | ACLA_072750   | XP_001275668 | kinesin                                   | <i>A. clavatus</i>   | 1633                          | N                  | 6-370        | (55) |
| 70987448  | XM_744044     | XP_749137    | Kip A                                     | <i>A. fumigatus</i>  | 955                           | M                  | 214-570      | (56) |
| 145236585 | An06g01130    | XP_001390940 | An06c0070                                 | <i>A. niger</i>      | 929                           | N                  | 11-331       | (57) |
| 145238370 | An07g07570    | XP_001391832 | An07c0220                                 | <i>A. niger</i>      | 1010                          | N                  | 6-376        | (57) |
| 145241043 | An08g10640    | XP_001393168 | An08g10640                                | <i>A. niger</i>      | 751                           | N                  | 2-351        | (57) |
| 145245976 | An12g01500    | XP_001395237 | An12c0060                                 | <i>A. niger</i>      | 1190                          | N                  | 86-432       | (57) |
| 145247797 | An13g00050    | XP_001396147 | An13g00050                                | <i>A. niger</i>      | 946                           | M                  | 213-561      | (57) |
| 145249752 | An14g05920    | XP_001401215 | An14g05920                                | <i>A. niger</i>      | 1750                          | N                  | 49-442       | (57) |
| 145249804 | An14g06180    | XP_001401241 | An14c0190                                 | <i>A. niger</i>      | 658                           | N                  | 93-450       | (57) |
| 145250765 | An15g03580    | XP_001396896 | An15c0130                                 | <i>A. niger</i>      | 1640                          | N                  | 5-368        | (57) |
| 115387289 | ATEG_01972    | XP_001211150 | putative protein                          | <i>A. terreus</i>    | 627                           | M                  | 101-422      | (58) |
| 115389040 | ATEG_02847    | XP_001212025 | putative protein                          | <i>A. terreus</i>    | 934                           | M                  | 242-589      | (58) |
| 115389982 | ATEG_03318    | XP_001212496 | putative protein                          | <i>A. terreus</i>    | 743                           | N                  | 2-351        | (58) |
| 115399560 | ATEG_06191    | XP_001215369 | putative protein                          | <i>A. terreus</i>    | 1745                          | N                  | 29-421       | (58) |
| 115401696 | ATEG_07815    | XP_001216436 | putative protein                          | <i>A. terreus</i>    | 1642                          | N                  | 7-369        | (58) |
| 115442786 | ATEG_09578    | XP_001218200 | putative protein                          | <i>A. terreus</i>    | 997                           | N                  | 9-379        | (58) |
| 115491037 | ATEG_00060    | XP_001210146 | putative protein                          | <i>A. terreus</i>    | 1175                          | N                  | 75-425       | (58) |
| 156084037 | BBOV_IV003380 | XP_001609502 | putative kinesin                          | <i>B. bovis</i>      | 618                           | C                  | 252-544      | (59) |
| 156085767 | BBOV_II007750 | XP_001610293 | putative kinesin                          | <i>B. bovis</i>      | 601                           | N                  | 9-340        | (59) |
| 1170673   |               | P46874       | Klp 2                                     | <i>B. mori</i>       | 378                           | N                  | 11-347       | (60) |
| 118480522 | EF092447      | ABK92267     | kinesin-like protein b                    | <i>B. mori</i>       | 482                           | N                  | 4-325        | (61) |
| 118480530 | EF092451      | ABK92271     | kinesin-like protein c                    | <i>B. mori</i>       | 489                           | N                  | 58-454       | (61) |
| 182511222 | NM_001123350  | NP_001116822 | kinesin-like protein KHC                  | <i>B. mori</i>       | 964                           | N                  | 10-333       | (61) |
| 182511224 | NM_001123351  | NP_001116823 | kinesin-like protein a                    | <i>B. mori</i>       | 627                           | M                  | 160-492      | (61) |
| 187281809 | NM_001126251  | NP_001119723 | kinesin-like protein Ncd                  | <i>B. mori</i>       | 620                           | C                  | 277-608      | (61) |
| 76618834  | XM_588573     | XP_588573    |                                           | <i>B. taurus</i>     | 1032                          | N                  | 7-327        | (62) |
| 113911953 | BC122794      | AAI22795     | similar to kinesin heavy chain isoform 5C | <i>B. taurus</i>     | 348                           | N                  | 6-327        | (62) |
| 116248182 | 768014        | Q2NL05       | Kif 2A                                    | <i>B. taurus</i>     | 660                           | M                  | 176-505      | (62) |
| 145566785 | 777770        | A0JN40       | Kif 3C                                    | <i>B. taurus</i>     | 792                           | N                  | 9-363        | (62) |
| 155372019 | NM_001101147  | NP_001094617 | kinesin family member 2C                  | <i>B. taurus</i>     | 723                           | M                  | 255-584      | (63) |
| 158705863 | 538921        | A6H750       | Kif 2B                                    | <i>B. taurus</i>     | 683                           | M                  | 212-541      | (62) |
| 160707937 | NM_001110788  | NP_001104258 | kinesin family member 3B                  | <i>B. taurus</i>     | 743                           | N                  | 17-358       | (64) |
| 205815452 | 506294        | A6QPL4       | Kif 22                                    | <i>B. taurus</i>     | 662                           | N                  | 48-361       | (62) |
| 154289830 | BC1G_15944    | XP_001545520 | putative protein                          | <i>B. fuckeliana</i> | 1009                          | N                  | 45-378       | (65) |
| 154291982 | BC1G_14918    | XP_001546569 | putative protein                          | <i>B. fuckeliana</i> | 733                           | N                  | 2-331        | (65) |
| 154299063 | BC1G_11844    | XP_001549952 | putative protein                          | <i>B. fuckeliana</i> | 1008                          | M                  | 243-601      | (65) |
| 154304427 | BC1G_09089    | XP_001552618 | putative protein                          | <i>B. fuckeliana</i> | 1846                          | N                  | 7-372        | (65) |
| 154312475 | BC1G_05840    | XP_001555565 | putative protein                          | <i>B. fuckeliana</i> | 933                           | N                  | 83-433       | (65) |
| 154314058 | BC1G_04972    | XP_001556354 | putative protein                          | <i>B. fuckeliana</i> | 1701                          | N                  | 17-404       | (65) |
| 154319592 | BC1G_02277    | XP_001559113 | kinesin heavy chain                       | <i>B. fuckeliana</i> | 929                           | N                  | 3-323        | (65) |

| GI        | Gene ID                | NCBI Prot ID | Protein Name                            | Taxa                  | No. aa in full length protein | Motor type (N/M/C) | Motor domain | Ref. |
|-----------|------------------------|--------------|-----------------------------------------|-----------------------|-------------------------------|--------------------|--------------|------|
| 1170664   | 176179                 | P34540       | KINH                                    | <i>C. elegans</i>     | 815                           | N                  | 9-329        | (66) |
| 1176597   | 191697                 | P45962       | Klp 3                                   | <i>C. elegans</i>     | 598                           | C                  | 244-565      | (67) |
| 1707073   | U80450.1               |              | kinesin-like protein 15                 | <i>C. elegans</i>     | 587                           | C                  | 246-569      | (67) |
| 3874906   | Z81048                 | CAB02839     | C41G7.2                                 | <i>C. elegans</i>     | 587                           | C                  | 246-569      | (67) |
| 3878522   | Z92807                 | CAB07264     | K11D9.1a                                | <i>C. elegans</i>     | 747                           | M                  | 320-648      | (67) |
| 3880931   | Y43F4B.6               | CAA16335     | Klp 19                                  | <i>C. elegans</i>     | 1083                          | N                  | 5-325        | (67) |
| 17538506  | C06G3.2                | NP_501093    | Klp 18                                  | <i>C. elegans</i>     | 932                           | N                  | 4-327        | (67) |
| 17554190  | R144.1                 | NP_498069    | Klp 6                                   | <i>C. elegans</i>     | 928                           | N                  | 5-365        | (67) |
| 17556094  | NM_064777              | NP_497178    | Klp 20                                  | <i>C. elegans</i>     | 646                           | N                  | 5-331        | (67) |
| 17557420  | NM_074181              | NP_506582    | bmk-1 (F23B12.8)                        | <i>C. elegans</i>     | 958                           | N                  | 11-354       | (67) |
| 25144877  | F20C5.2, F20C5.2a      | NP_741473    | putative Klp-11                         | <i>C. elegans</i>     | 782                           | N                  | 12-343       | (67) |
| 25154708  | K12F2.2                | NP_506063    | Kif 26L                                 | <i>C. elegans</i>     | 1066                          | N                  | 50-291       | (67) |
| 54042065  | C52E12.2               | P23678       | Un 104                                  | <i>C. elegans</i>     | 1584                          | N                  | 2-354        | (68) |
| 56405341  | 177141                 | P46873       | Osm 3                                   | <i>C. elegans</i>     | 699                           | N                  | 3-327        | (69) |
| 193206546 | T01G1.1, T01G1.1c      | NP_001122796 | putative Klp-12                         | <i>C. elegans</i>     | 1580                          | N                  | 4-359        | (67) |
| 3859666   | AL033502               | CAA22004     | kinesin                                 | <i>C. albicans</i>    | 665                           | N                  | 76-403       | (70) |
| 1169693   | XM_001701458           | P46869       | Fla 10                                  | <i>C. reinhardtii</i> | 786                           | N                  | 9-353        | (71) |
| 1170672   |                        | P46870       | Klp 1                                   | <i>C. reinhardtii</i> | 776                           | N                  | 5-333        | (72) |
| 95061517  | DQ499010               | ABF50981     | kinesin like calmodulin binding protein | <i>C. reinhardtii</i> | 1238                          | C                  | 850-1184     | (73) |
| 119174590 | CIMG_09273             | XP_001239652 | putative protein                        | <i>C. immitis</i>     | 620                           | N                  | 93-446       | (37) |
| 119175944 | CIMG_09742             | XP_001240121 | putative protein                        | <i>C. immitis</i>     | 1850                          | N                  | 99-493       | (37) |
| 119176882 | CIMG_07460             | XP_001240297 | putative protein                        | <i>C. immitis</i>     | 1011                          | M                  | 243-600      | (37) |
| 119189013 | CIMG_04554             | XP_001245113 | putative protein                        | <i>C. immitis</i>     | 995                           | N                  | 9-379        | (37) |
| 119196023 | CIMG_02386             | XP_001248615 | putative protein                        | <i>C. immitis</i>     | 1658                          | N                  | 7-370        | (37) |
| 119196989 | CIMG_02869             | XP_001249098 | kinesin heavy chain                     | <i>C. immitis</i>     | 932                           | N                  | 10-330       | (37) |
| 8488991   |                        | P70096       | Kif 2C                                  | <i>C. griseus</i>     | 718                           | M                  | 251-580      | (74) |
| 81890110  |                        | Q60443       | Kif C1                                  | <i>C. griseus</i>     | 622                           | C                  | 258-615      | (75) |
| 126644785 | cgd3_2590              | XP_001388114 | K2                                      | <i>C. parvum</i>      | 543                           | C                  | 202-537      | (76) |
| 126644807 | cgd3_3090              | XP_001388120 | putative protein                        | <i>C. parvum</i>      | 634                           | N                  | 3-411        | (76) |
| 126649293 | cgd6_1900              | XP_001388318 | putative kinesin heavy chain            | <i>C. parvum</i>      | 714                           | N                  | 75-447       | (76) |
| 126649295 | cgd6_1920              | XP_001388319 | putative kinesin heavy chain            | <i>C. parvum</i>      | 925                           | N                  | 60-413       | (76) |
| 126649651 | cgd6_4210              | XP_001388347 | putative boursin                        | <i>C. parvum</i>      | 1184                          | N                  | 15-371       | (76) |
| 150036248 | EF657230               | ABR67411     | kinesin                                 | <i>C. melo</i>        | 791                           | M                  | 138-461      | (77) |
| 82193823  | 544651                 | Q58G59       | Kif 7                                   | <i>D. rerio</i>       | 1363                          | N                  | 14-348       | (78) |
| 94732475  | BX248120               | CAK04215     | kinesin                                 | <i>D. rerio</i>       | 753                           | C                  | 351-679      | (79) |
| 113678678 | NM_001044954           | NP_001038419 | kinesin family member C1                | <i>D. rerio</i>       | 618                           | C                  | 271-611      | (79) |
| 113678899 | NM_001044976           | NP_001038441 | kinesin family member 14                | <i>D. rerio</i>       | 1307                          | N                  | 37-389       | (79) |
| 116284166 | BC124345               | AAI24346     | Kif19 protein                           | <i>D. rerio</i>       | 524                           | N                  | 11-346       | (80) |
| 116812563 | NM_001077431           | NP_001070899 | kinesin family member 6                 | <i>D. rerio</i>       | 667                           | N                  | 5-334        | (80) |
| 117558195 | BC127399               | AAI27400     | Wu:fc51g12 protein                      | <i>D. rerio</i>       | 1048                          | N                  | 18-357       | (80) |
| 123208287 | DKEY-96L17.6-001       | CAM15547     | similar to vertebrate kinesin family    | <i>D. rerio</i>       | 374                           | N                  | 18-344       | (79) |
| 124481663 | LOC100149074           | AAI33148     | putative protein                        | <i>D. rerio</i>       | 547                           | N                  | 8-369        | (80) |
| 145388828 | EF507508               | ABP65301     | Kif17                                   | <i>D. rerio</i>       | 805                           | N                  | 1-330        | (81) |
| 148725639 | DKEY-38K3.2-001        | CAN88221     | kinesin                                 | <i>D. rerio</i>       | 433                           | N                  | 13-324       | (79) |
| 153945806 | NM_001100145           | NP_001093615 | kinesin family member 3B                | <i>D. rerio</i>       | 775                           | N                  | 15-341       | (80) |
| 169145643 | CR354377.9, CT573457.8 | CAQ15503     | novel protein (zgc:55995)               | <i>D. rerio</i>       | 895                           | N                  | 18-353       | (79) |

| GI        | Gene ID      | NCBI Prot ID | Protein Name                             | Taxa                    | No. aa in full length protein | Motor type (N/M/C) | Motor domain | Ref.  |
|-----------|--------------|--------------|------------------------------------------|-------------------------|-------------------------------|--------------------|--------------|-------|
| 169145918 | CU463105     | CAQ15674     | similar to kinesin heavy chain member 2A | <i>D. rerio</i>         | 719                           | M                  | 235-564      | (79)  |
| 169158591 | CR457482     | CAQ15489     | Kif 5a                                   | <i>D. rerio</i>         | 850                           | N                  | 6-325        | (79)  |
| 189533414 | XM_691034.3  | XP_696126    |                                          | <i>D. rerio</i>         | 663                           | N                  | 9-341        | (79)  |
| 205809507 | 561788       | A8WFU8       | Kif 22                                   | <i>D. rerio</i>         | 634                           | N                  | 19-343       | (80)  |
| 292609530 | XM_001337800 | XP_001337836 | similar to Kif19                         | <i>D. rerio</i>         | 846                           | N                  | 12-349       | (79)  |
| 66813336  | XM_635755    | XP_640847    | K3                                       | <i>D. discoideum</i>    | 1193                          | N                  | 1-325        | (82)  |
| 74837488  | 3398238      | Q6S004       | Kif 6                                    | <i>D. discoideum</i>    | 1030                          | M                  | 452-773      | (83)  |
| 74853977  | DDB_G0285101 | Q54NP8       | Kif 4                                    | <i>D. discoideum</i>    | 1922                          | N                  | 22-343       | (82)  |
| 74855339  | DDB_G0281555 | Q54TL0       | Kif 7                                    | <i>D. discoideum</i>    | 1255                          | N                  | 26-349       | (82)  |
| 74913711  | 3388356      | Q6RZZ9       | Kif 13                                   | <i>D. discoideum</i>    | 1265                          | N                  | 21-359       | (83)  |
| 74913713  | 3387029      | Q6S001       | Kif 11                                   | <i>D. discoideum</i>    | 685                           | N                  | 4-405        | (83)  |
| 74913714  | 3385875      | Q6S002       | Kif 10                                   | <i>D. discoideum</i>    | 1238                          | N                  | 16-374       | (83)  |
| 74933977  | 3394334      | Q8T135       | Kif 5                                    | <i>D. discoideum</i>    | 990                           | N                  | 4-330        | (84)  |
| 74940780  | 3398234      | Q9BPU3       | Kif 2                                    | <i>D. discoideum</i>    | 792                           | C                  | 435-784      | (85)  |
| 75024117  | 3386989      | Q9NGQ2       | Kif 1                                    | <i>D. discoideum</i>    | 2205                          | N                  | 1-362        | (86)  |
| 127945    | 43517        | P20480       | NCD                                      | <i>D. melanogaster</i>  | 700                           | C                  | 346-672      | (87)  |
| 128497    | 32107        | P18105       | NOD                                      | <i>D. melanogaster</i>  | 666                           | N                  | 8-318        | (88)  |
| 1881662   | DMU89264     | AAB49460     | kfp67a                                   | <i>D. melanogaster</i>  | 814                           | N                  | 8-346        | (89)  |
| 4972758   | AF132186     | AAD34774     | no ID                                    | <i>D. melanogaster</i>  | 1212                          | N                  | 7-336        | (90)  |
| 6942201   | AF220353     | AAF32355     | CENP-meta                                | <i>D. melanogaster</i>  | 2244                          | N                  | 8-321        | (91)  |
| 6942203   | AF220354     | AAF32356     | CENP-ana                                 | <i>D. melanogaster</i>  | 1931                          | N                  | 8-310        | (91)  |
| 7298657   | CG10718      |              | Nebbish (Klp38B)                         | <i>D. melanogaster</i>  | 1121                          | M                  | 119-525      | (90)  |
| 7533198   | AF247500     | AAF63388     | kinesin-like protein 7533198             | <i>D. melanogaster</i>  | 1048                          | N                  | 12-364       | (92)  |
| 17647557  | NM_079210    | NP_523934    | Kinesin-like protein at 64D, CG10642-PA  | <i>D. melanogaster</i>  | 677                           | N                  | 19-352       | (93)  |
| 17864550  | NM_080144    | NP_524883    | Klp 54D                                  | <i>D. melanogaster</i>  | 844                           | M                  | 168-514      | (93)  |
| 19856508  | 36810        | P17210       | KINH                                     | <i>D. melanogaster</i>  | 975                           | N                  | 10-333       | (94)  |
| 24659128  | NM_137918    | NP_611762    | Klp59D, CG12192-PA                       | <i>D. melanogaster</i>  | 729                           | M                  | 232-565      | (93)  |
| 26006996  | 38135        | P46863       | Klp61F                                   | <i>D. melanogaster</i>  | 1066                          | N                  | 17-365       | (95)  |
| 28573817  | NM_135357    | NP_609201    | CG8183-PA, isoform A                     | <i>D. melanogaster</i>  | 1921                          | N                  | 4-359        | (93)  |
| 41688591  | 32049        | Q960Z0       | Klp 10A                                  | <i>D. melanogaster</i>  | 805                           | M                  | 277-608      | (90)  |
| 41688598  | 37671        | Q9W1U4       | Klp59C                                   | <i>D. melanogaster</i>  | 626                           | M                  | 186-519      | (90)  |
| 74948187  | CG14535      | Q9VLW2       | Kif 26L                                  | <i>D. melanogaster</i>  | 1131                          | N                  | 44-391       | (90)  |
| 119364607 | 39332        | P46867       | Klp 68D                                  | <i>D. melanogaster</i>  | 784                           | N                  | 18-344       | (96)  |
| 158514035 | 36876        | A1ZAJ2       | Kif 1A                                   | <i>D. melanogaster</i>  | 1670                          | N                  | 2-358        | (90)  |
| 160017392 | 35653        | O16844       | Cost 2                                   | <i>D. melanogaster</i>  | 1201                          | M                  | 132-3        | (97)  |
| 122064274 | 4812180      | Q29DY1       | Klp 68D                                  | <i>D. pseudoobscura</i> | 797                           | N                  | 18-344       | (98)  |
| 122109389 | 4805677      | Q28WQ1       | Kinesin-like protein unc-104             | <i>D. pseudoobscura</i> | 1671                          | N                  | 2-358        | (98)  |
| 198474507 | 4817387      | XP_001356717 | GA13060-PA                               | <i>D. pseudoobscura</i> | 1171                          | N                  | 40-395       | (98)  |
| 221222444 | 4803492      | Q292S8       | Cost 2                                   | <i>D. pseudoobscura</i> | 1223                          | M                  | 142-392      | (98)  |
| 12044815  | AJ291452     | CAC19836     | Kin A                                    | <i>E. nidulans</i>      | 927                           | N                  | 9-330        | (99)  |
| 40974913  | AJ620863     | CAF06507     | kinesin                                  | <i>E. nidulans</i>      | 989                           | N                  | 12-379       | (100) |
| 238054276 | AN3363       | P17120       | BimC                                     | <i>E. nidulans</i>      | 1184                          | N                  | 79-424       | (101) |
| 149689859 | XM_001502579 | XP_001502629 | KIF11                                    | <i>E. caballus</i>      | 1056                          | N                  | 16-368       | (102) |
| 149693713 | XM_001496793 | XP_001496843 | kinesin family member 2C isoform 1       | <i>E. caballus</i>      | 723                           | M                  | 255-584      | (102) |
| 149714100 | XM_001500023 | XP_001500073 | KIF21A                                   | <i>E. caballus</i>      | 1786                          | M                  | 126-484      | (102) |
| 149719535 | XM_001504992 | XP_001505042 | kinesin family member 18A                | <i>E. caballus</i>      | 895                           | N                  | 11-355       | (102) |
| 149723689 | XM_001488734 | XP_001488784 | kinesin family member 18B                | <i>E. caballus</i>      | 860                           | N                  | 16-351       | (102) |
| 149727714 | XM_001502843 | XP_001502893 | No ID                                    | <i>E. caballus</i>      | 792                           | N                  | 9-364        | (102) |



| GI        | Gene ID      | NCBI Prot ID | Protein Name                     | Taxa                   | No. aa in full length protein | Motor type (N/M/C) | Motor domain | Ref.  |
|-----------|--------------|--------------|----------------------------------|------------------------|-------------------------------|--------------------|--------------|-------|
| 149733059 | XM_001491846 | XP_001491896 | kinesin family member 16B        | <i>E. caballus</i>     | 1314                          | N                  | 2-365        | (102) |
| 149733181 | XM_001500189 | XP_001500239 | KIF3B                            | <i>E. caballus</i>     | 747                           | N                  | 18-340       | (102) |
| 149737083 | XM_001499631 | XP_001499681 | kinesin family member 24         | <i>E. caballus</i>     | 1367                          | M                  | 222-544      | (102) |
| 149758455 | XM_001488810 | XP_001488860 | kinesin family member 27         | <i>E. caballus</i>     | 1405                          | N                  | 4-342        | (102) |
| 194206515 | XM_001495525 | XP_001495575 | kinesin family member 23         | <i>E. caballus</i>     | 816                           | N                  | 23-398       | (102) |
| 194206739 | XM_001500620 | XP_001500670 | StARD9                           | <i>E. caballus</i>     | 4680                          | N                  | 2-391        | (102) |
| 194207931 | XM_001504329 | XP_001504379 | kinesin family member 17         | <i>E. caballus</i>     | 1001                          | N                  | 4-335        | (102) |
| 194212300 | XM_001489282 | XP_001489332 | kinesin family member 5A         | <i>E. caballus</i>     | 1024                          | N                  | 7-327        | (102) |
| 194217548 | XM_001502888 | XP_001502938 | kinesin family member 1C         | <i>E. caballus</i>     | 1102                          | N                  | 4-355        | (102) |
| 194218757 | XM_001492229 | XP_001492279 | KIF 19                           | <i>E. caballus</i>     | 961                           | N                  | 7-344        | (102) |
| 194219052 | XM_001496313 | XP_001496363 | kinesin family member 22         | <i>E. caballus</i>     | 651                           | N                  | 36-349       | (102) |
| 194219937 | XM_001502905 | XP_001502955 | kinesin family member 3A         | <i>E. caballus</i>     | 702                           | N                  | 13-345       | (102) |
| 194221381 | XM_001495592 | XP_001495642 | kinesin family member 9          | <i>E. caballus</i>     | 789                           | N                  | 6-338        | (102) |
| 194222214 | XM_001490166 | XP_001490216 | kinesin heavy chain isoform 5C   | <i>E. caballus</i>     | 923                           | N                  | 7-293        | (102) |
| 194223411 | XM_001493478 | XP_001493528 | kinesin family member C1         | <i>E. caballus</i>     | 675                           | C                  | 310-668      | (102) |
| 194223853 | XM_001493976 | XP_001494026 | kinesin heavy chain member 2A    | <i>E. caballus</i>     | 660                           | M                  | 176-505      | (102) |
| 194227062 | XM_001493254 | XP_001493304 | similar to kinesin-1 heavy chain | <i>E. caballus</i>     | 960                           | N                  | 18-322       | (102) |
| 194227280 | XM_001491714 | XP_001491764 | Klp 6                            | <i>E. caballus</i>     | 1004                          | N                  | 12-354       | (102) |
| 194227511 | XM_001489250 | XP_001489300 | kinesin family member 25         | <i>E. caballus</i>     | 477                           | C                  | 123-462      | (102) |
| 194227999 | XM_001491181 | XP_001491231 | kinesin family member 4A         | <i>E. caballus</i>     | 1166                          | N                  | 8-283        | (102) |
| 18202611  | 395823       | Q90640       | KIF4                             | <i>G. gallus</i>       | 1225                          | N                  | 11-344       | (103) |
| 82197864  | 419968       | Q5ZLK6       | Kif 18B                          | <i>G. gallus</i>       | 797                           | N                  | 24-352       | (104) |
| 126165270 | NM_001081698 | NP_001075167 | XCTK2-like motor protein         | <i>G. gallus</i>       | 647                           | C                  | 295-640      | (105) |
| 158705889 | 427156       | Q5ZKV8       | Kif 2A                           | <i>G. gallus</i>       | 706                           | M                  | 222-551      | (104) |
| 51316436  |              | Q86Z98       | KINH                             | <i>G. moniliformis</i> | 931                           | N                  | 4-329        | (106) |
| 127519339 | EF432568     | ABO28522     | kinesin-related protein          | <i>G. hirsutum</i>     | 1015                          | M                  | 400-729      | (107) |
| 417216    | 3799         | P33176       | KINH                             | <i>H. sapiens</i>      | 963                           | N                  | 6-325        | (108) |
| 3913957   | 3797         | O14782       | Kif 3C                           | <i>H. sapiens</i>      | 793                           | N                  | 9-365        | (109) |
| 3913958   | 9371         | O15066       | Kif 3B                           | <i>H. sapiens</i>      | 747                           | N                  | 18-340       | (110) |
| 13124319  | 3800         | O60282       | Kif 5C                           | <i>H. sapiens</i>      | 957                           | N                  | 6-327        | (111) |
| 19863381  | 3835         | Q14807       | Kif 22                           | <i>H. sapiens</i>      | 665                           | N                  | 60-366       | (112) |
| 20138710  | 3833         | Q9BW19       | Kif C1                           | <i>H. sapiens</i>      | 673                           | C                  | 308-666      | (113) |
| 20138788  | 3834         | Q9UIL4       | Kif 25                           | <i>H. sapiens</i>      | 384                           | N                  | 31-366       | (114) |
| 20141607  | 11004        | Q99661       | Kif 2C                           | <i>H. sapiens</i>      | 725                           | M                  | 257-586      | (115) |
| 23396625  | 23303        | Q9NQT8       | Kif 13B                          | <i>H. sapiens</i>      | 1826                          | N                  | 4-360        | (116) |
| 23396633  | 9928         | Q15058       | Kif 14                           | <i>H. sapiens</i>      | 1648                          | M                  | 357-708      | (117) |
| 34098674  | 90990        | Q96AC6       | Kif C2                           | <i>H. sapiens</i>      | 838                           | M                  | 407-707      | (118) |
| 34978376  | 57576        | Q9P2E2       | kinesin family member 17         | <i>H. sapiens</i>      | 1029                          | N                  | 4-335        | (119) |
| 50400977  | 55605        | Q7Z4S6       | Kif 21A                          | <i>H. sapiens</i>      | 1674                          | N                  | 8-372        | (120) |
| 50403793  | 55614        | Q96L93       | Kif 16B                          | <i>H. sapiens</i>      | 1317                          | N                  | 2-365        | (121) |
| 52001487  | 64147        | Q9HAQ2       | Kif 9                            | <i>H. sapiens</i>      | 790                           | N                  | 6-338        | (118) |
| 59799772  | 23046        | O75037       | Kif 21B                          | <i>H. sapiens</i>      | 1637                          | N                  | 7-371        | (122) |
| 66774137  | 81930        | Q8NI77       | Kif 18A                          | <i>H. sapiens</i>      | 898                           | N                  | 11-355       | (123) |
| 74750464  | 55582        | Q86VH2       | Kif 27                           | <i>H. sapiens</i>      | 1401                          | N                  | 4-342        | (124) |
| 74752937  | 56992        | Q9NS87       | Kif 15                           | <i>H. sapiens</i>      | 1388                          | N                  | 25-363       | (125) |

| GI        | Gene ID      | NCBI Prot ID | Protein Name                      | Taxa                   | No. aa in full length protein | Motor type (N/M/C) | Motor domain | Ref.  |
|-----------|--------------|--------------|-----------------------------------|------------------------|-------------------------------|--------------------|--------------|-------|
| 85541032  | 113220       | Q96FN5       | Kif 12                            | <i>H. sapiens</i>      | 646                           | N                  | 25-358       | (126) |
| 116242604 | 3832         | P52732       | Kif 11                            | <i>H. sapiens</i>      | 1056                          | N                  | 16-368       | (127) |
| 116242605 | 23095        | O60333       | Kif 1B                            | <i>H. sapiens</i>      | 1816                          | N                  | 4-361        | (128) |
| 116242606 | 10749        | O43896       | Kif 1C                            | <i>H. sapiens</i>      | 1103                          | N                  | 4-355        | (129) |
| 118572662 | 63971        | Q9H1H9       | Kif 13A                           | <i>H. sapiens</i>      | 1805                          | N                  | 4-359        | (130) |
| 119364606 | 547          | Q12756       | Kif 1A                            | <i>H. sapiens</i>      | 1690                          | N                  | 4-361        | (131) |
| 121948325 | 55083        | Q2KJY2       | Kif 26B                           | <i>H. sapiens</i>      | 2108                          | M                  | 450-798      | (118) |
| 124056471 | 3801         | Q9BVG8       | Kif C3                            | <i>H. sapiens</i>      | 833                           | C                  | 443-771      | (132) |
| 126215730 | 124602       | Q2TAC6       | Kif 19                            | <i>H. sapiens</i>      | 998                           | N                  | 11-346       | (118) |
| 126215732 | 347240       | Q5T7B8       | Kif 24                            | <i>H. sapiens</i>      | 1368                          | M                  | 222-544      | (126) |
| 143811412 | 3798         | Q12840       | Kif 5A                            | <i>H. sapiens</i>      | 1032                          | N                  | 7-327        | (133) |
| 146345445 | 221458       | Q6ZMV9       | Kif 6                             | <i>H. sapiens</i>      | 814                           | N                  | 5-343        | (118) |
| 158564279 | 285643       | Q2VIQ3       | Kif 4B                            | <i>H. sapiens</i>      | 1234                          | N                  | 8-337        | (134) |
| 158931161 | 3796         | O00139       | Kif 2A                            | <i>H. sapiens</i>      | 706                           | M                  | 222-551      | (135) |
| 160014128 | 26153        | Q9ULI4       | Kif 26A                           | <i>H. sapiens</i>      | 1882                          | M                  | 371-723      | (136) |
| 160112933 | KIAA1300     | Q9P2P6       | Star 9                            | <i>H. sapiens</i>      | 4614                          | N                  | 2-384        | (137) |
| 160358869 | 1062         | Q02224       | CENPE                             | <i>H. sapiens</i>      | 2701                          | N                  | 6-329        | (138) |
| 172045866 | 374654       | Q2M1P5       | Kif 7                             | <i>H. sapiens</i>      | 1343                          | N                  | 14-350       | (139) |
| 182662392 |              | Q86Y91       | Kif 18B                           | <i>H. sapiens</i>      | 844                           | N                  | 21-351       | (118) |
| 229462962 |              | Q9Y496       | Kif 3A                            | <i>H. sapiens</i>      | 702                           | N                  | 13-345       | (140) |
| 251757291 | 84643        | Q8N4N8       | Kif 2B                            | <i>H. sapiens</i>      | 673                           | M                  | 211-549      | (118) |
| 134061870 | AM494958     | CAM38907     | putative kinesin                  | <i>L. braziliensis</i> | 2140                          | M                  | 183-470      | (141) |
| 154331027 | XM_001561903 | XP_001561953 | kinesin                           | <i>L. braziliensis</i> | 662                           | M                  | 119-485      | (141) |
| 154331257 | XM_001561397 | XP_001561447 | putative MCAK                     | <i>L. braziliensis</i> | 663                           | M                  | 127-445      | (141) |
| 154333802 | XM_001563106 | XP_001563156 | putative MCAK                     | <i>L. braziliensis</i> | 656                           | N                  | 2-281        | (141) |
| 154334064 | XM_001563237 | XP_001563287 | putative kinesin                  | <i>L. braziliensis</i> | 729                           | M                  | 207-516      | (141) |
| 154334291 | XM_001563347 | XP_001563397 | putative K39                      | <i>L. braziliensis</i> | 2155                          | N                  | 36-413       | (141) |
| 154334303 | XM_001563353 | XP_001563403 | putative kinesin                  | <i>L. braziliensis</i> | 1078                          | N                  | 66-486       | (141) |
| 154335017 | XM_001563705 | XP_001563755 | putative kinesin                  | <i>L. braziliensis</i> | 1037                          | M                  | 167-481      | (141) |
| 154335216 | XM_001563798 | XP_001563848 | putative OSM3                     | <i>L. braziliensis</i> | 928                           | N                  | 12-339       | (141) |
| 154335298 | XM_001563839 | XP_001563889 | putative kinesin                  | <i>L. braziliensis</i> | 1433                          | N                  | 10-342       | (141) |
| 154335689 | XM_001564033 | XP_001564083 | putative kinesin                  | <i>L. braziliensis</i> | 791                           | N                  | 5-315        | (141) |
| 154335834 | XM_001564103 | XP_001564153 | C-terminal motor putative kinesin | <i>L. braziliensis</i> | 839                           | C                  | 500-802      | (141) |
| 154335920 | XM_001564146 | XP_001564196 | putative kinesin                  | <i>L. braziliensis</i> | 1097                          | M                  | 218-557      | (141) |
| 154336383 | XM_001564377 | XP_001564427 | putative kinesin                  | <i>L. braziliensis</i> | 513                           | N                  | 66-467       | (141) |
| 154336867 | XM_001564619 | XP_001564669 | putative Unc104                   | <i>L. braziliensis</i> | 1534                          | N                  | 89-441       | (141) |
| 154337473 | XM_001564919 | XP_001564969 | putative kinesin                  | <i>L. braziliensis</i> | 893                           | N                  | 9-441        | (141) |
| 154337545 | XM_001564955 | XP_001565005 | putative kinesin                  | <i>L. braziliensis</i> | 1432                          | M                  | 183-523      | (141) |
| 154337834 | XM_001565093 | XP_001565143 | putative kinesin                  | <i>L. braziliensis</i> | 720                           | N                  | 46-451       | (141) |
| 154338062 | XM_001565207 | XP_001565257 | kinesin                           | <i>L. braziliensis</i> | 1203                          | M                  | 124-440      | (141) |
| 154338215 | XM_001565282 | XP_001565332 | putative MCAK                     | <i>L. braziliensis</i> | 578                           | N                  | 3-322        | (141) |
| 154338866 | XM_001565605 | XP_001565655 | Putative kinesin                  | <i>L. braziliensis</i> | 1045                          | N                  | 5-315        | (141) |
| 154338870 | XM_001565607 | XP_001565657 | Putative kinesin                  | <i>L. braziliensis</i> | 1053                          | N                  | 84-440       | (141) |
| 154340994 | XM_001566400 | XP_001566450 | Putative kinesin                  | <i>L. braziliensis</i> | 1628                          | N                  | 9-347        | (141) |
| 154341250 | XM_001566528 | XP_001566578 | Putative kinesin                  | <i>L. braziliensis</i> | 518                           | N                  | 1-267        | (141) |
| 154341252 | XM_001566529 | XP_001566579 | Putative kinesin                  | <i>L. braziliensis</i> | 588                           | N                  | 8-337        | (141) |
| 154341441 | XM_001566622 | XP_001566672 | Putative kinesin                  | <i>L. braziliensis</i> | 607                           | N                  | 15-352       | (141) |
| 154341667 | XM_001566735 | XP_001566785 | Putative kinesin                  | <i>L. braziliensis</i> | 1201                          | N                  | 5-354        | (141) |
| 154341957 | XM_001566880 | XP_001566930 | Putative kinesin                  | <i>L. braziliensis</i> | 1191                          | N                  | 86-405       | (141) |
| 154342184 | XM_001566990 | XP_001567040 | putative MCAK                     | <i>L. braziliensis</i> | 881                           | M                  | 247-560      | (141) |
| 154342975 | XM_001567383 | XP_001567433 | putative OSM3                     | <i>L. braziliensis</i> | 1118                          | N                  | 10-336       | (141) |
| 154344132 | XM_001567960 | XP_001568010 | putative kinesin                  | <i>L. braziliensis</i> | 964                           | N                  | 2-300        | (141) |
| 154344212 | XM_001568000 | XP_001568050 | putative Unc104                   | <i>L. braziliensis</i> | 2069                          | N                  | 37-476       | (141) |
| 154344735 | XM_001568259 | XP_001568309 | putative kinesin                  | <i>L. braziliensis</i> | 694                           | N                  | 9-416        | (141) |
| 154346438 | XM_001569106 | XP_001569156 | putative protein                  | <i>L. braziliensis</i> | 625                           | N                  | 11-349       | (141) |
| 1170665   |              | P46865       | KINL                              | <i>L. chagasi</i>      | 955                           | N                  | 11-399       | (142) |
| 112293605 | DQ831678     | ABI14928     | K39 kinesin protein               | <i>L. donovani</i>     | 3276                          | N                  | 11-399       | (143) |
| 134069673 | AM502240     | CAM67997     | putative kinesin                  | <i>L. infantum</i>     | 889                           | N                  | 9-432        | (141) |
| 146074824 | XM_001462580 | XP_001462617 | putative MCAK                     | <i>L. infantum</i>     | 673                           | M                  | 131-449      | (141) |
| 146076877 | XM_001462989 | XP_001463026 | putative kinesin                  | <i>L. infantum</i>     | 1069                          | N                  | 1-289        | (141) |
| 146080601 | XM_001464003 | XP_001464040 | putative MCAK                     | <i>L. infantum</i>     | 726                           | N                  | 35-350       | (141) |
| 146081054 | XM_001464143 | XP_001464180 | putative MCAK                     | <i>L. infantum</i>     | 728                           | M                  | 196-515      | (141) |
| 146081490 | XM_001464229 | XP_001464266 | putative kinesin                  | <i>L. infantum</i>     | 1307                          | M                  | 264-591      | (141) |
| 146081615 | XM_001464259 | XP_001464296 | putative K39                      | <i>L. infantum</i>     | 2461                          | N                  | 36-412       | (141) |

| GI        | Gene ID                                  | NCBI Prot ID | Protein Name                 | Taxa                   | No. aa in full length protein | Motor type (N/M/C) | Motor domain | Ref.  |
|-----------|------------------------------------------|--------------|------------------------------|------------------------|-------------------------------|--------------------|--------------|-------|
| 146081628 | XM_001464262                             | XP_001464299 | putative K39                 | <i>L. infantum</i>     | 2926                          | N                  | 39-436       | (141) |
| 146082939 | XM_001464598                             | XP_001464635 | putative kinesin             | <i>L. infantum</i>     | 608                           | M                  | 144-458      | (141) |
| 146082943 | XM_001464599                             | XP_001464636 | putative kinesin             | <i>L. infantum</i>     | 793                           | N                  | 38-352       | (141) |
| 146082988 | XM_001464610                             | XP_001464647 | putative kinesin             | <i>L. infantum</i>     | 1082                          | N                  | 11-408       | (141) |
| 146083473 | XM_001464711                             | XP_001464748 | putative OSM3                | <i>L. infantum</i>     | 940                           | N                  | 12-339       | (141) |
| 146083578 | XM_001464742                             | XP_001464779 | putative kinesin             | <i>L. infantum</i>     | 1430                          | N                  | 10-342       | (141) |
| 146084251 | XM_001464934                             | XP_001464971 | putative kinesin             | <i>L. infantum</i>     | 796                           | N                  | 5-315        | (141) |
| 146084383 | XM_001464952                             | XP_001464989 | putative C-terminal kinesin  | <i>L. infantum</i>     | 841                           | C                  | 501-803      | (141) |
| 146084523 | XM_001464993                             | XP_001465030 | putative kinesin             | <i>L. infantum</i>     | 1091                          | M                  | 218-558      | (141) |
| 146084573 | XM_001465006                             | XP_001465043 | putative kinesin             | <i>L. infantum</i>     | 1135                          | N                  | 80-566       | (141) |
| 146086674 | XM_001465573                             | XP_001465610 | putative kinesin             | <i>L. infantum</i>     | 1255                          | N                  | 7-329        | (141) |
| 146087173 | XM_001465710                             | XP_001465747 | putative kinesin             | <i>L. infantum</i>     | 656                           | N                  | 7-387        | (141) |
| 146087748 | XM_001465856                             | XP_001465893 | putative MCAK                | <i>L. infantum</i>     | 577                           | N                  | 3-322        | (141) |
| 146089100 | XM_001466197                             | XP_001466234 | putative kinesin             | <i>L. infantum</i>     | 1066                          | N                  | 5-315        | (141) |
| 146089107 | XM_001466199                             | XP_001466236 | putative kinesin             | <i>L. infantum</i>     | 1062                          | N                  | 84-445       | (141) |
| 146092165 | XM_001470186                             | XP_001470223 | putative kinesin             | <i>L. infantum</i>     | 965                           | C                  | 613-956      | (141) |
| 146093025 | XM_001466587                             | XP_001466624 | putative kinesin             | <i>L. infantum</i>     | 1665                          | N                  | 25-385       | (141) |
| 146093319 | XM_001466734                             | XP_001466771 | putative kinesin             | <i>L. infantum</i>     | 590                           | N                  | 10-339       | (141) |
| 146093321 | XM_001466735                             | XP_001466772 | putative kinesin             | <i>L. infantum</i>     | 589                           | N                  | 8-337        | (141) |
| 146093540 | XM_001466844                             | XP_001466881 | putative kinesin             | <i>L. infantum</i>     | 610                           | N                  | 15-352       | (141) |
| 146093774 | XM_001466961                             | XP_001466998 | putative kinesin             | <i>L. infantum</i>     | 1211                          | N                  | 5-354        | (141) |
| 146094090 | XM_001467119                             | XP_001467156 | putative kinesin             | <i>L. infantum</i>     | 1190                          | N                  | 85-404       | (141) |
| 146094262 | XM_001467205                             | XP_001467242 | putative kinesin             | <i>L. infantum</i>     | 2129                          | M                  | 179-466      | (141) |
| 146094485 | XM_001467254                             | XP_001467291 | putative MCAK                | <i>L. infantum</i>     | 951                           | M                  | 320-633      | (141) |
| 146096205 | XM_001467696                             | XP_001467733 | putative OSM3                | <i>L. infantum</i>     | 1117                          | N                  | 10-336       | (141) |
| 146098051 | XM_001468267                             | XP_001468304 | putative kinesin             | <i>L. infantum</i>     | 960                           | N                  | 2-300        | (141) |
| 146098084 | XM_001468277                             | XP_001468314 | putative Unc104              | <i>L. infantum</i>     | 2074                          | N                  | 37-476       | (141) |
| 146099027 | XM_001468498                             | XP_001468535 | putative kinesin             | <i>L. infantum</i>     | 1068                          | N                  | 65-485       | (141) |
| 146101101 | XM_001468989                             | XP_001469026 | putative kinesin             | <i>L. infantum</i>     | 698                           | N                  | 9-417        | (141) |
| 146104762 | XM_001469869                             | XP_001469906 | putative protein             | <i>L. infantum</i>     | 625                           | N                  | 11-349       | (141) |
| 6855413   | AL049768                                 | CAB71236     | kinesin                      | <i>L. major</i>        | 656                           | N                  | 7-387        | (144) |
| 11071678  | AL449123                                 | CAC14606     | kinesin                      | <i>L. major</i>        | 956                           | N                  | 2-300        | (144) |
| 157878755 | XM_001687343                             | XP_001687395 | putative MCAK                | <i>L. major</i>        | 668                           | M                  | 133-451      | (145) |
| 149239258 | XM_001525455                             | XP_001525505 | putative protein             | <i>L. elongisporus</i> | 823                           | N                  | 1-398        | (146) |
| 149240177 | XM_001525914                             | XP_001525964 | putative protein             | <i>L. elongisporus</i> | 840                           | M                  | 131-510      | (146) |
| 149240816 | XM_001526181                             | XP_001526231 | putative protein             | <i>L. elongisporus</i> | 926                           | N                  | 53-435       | (146) |
| 149246994 | XM_001527872                             | XP_001527922 | putative protein             | <i>L. elongisporus</i> | 972                           | N                  | 58-395       | (146) |
| 125415    |                                          | P21613       | KINH                         | <i>L. pealei</i>       | 967                           | N                  | 6-326        | (147) |
| 48474595  | QtsA-16015                               | Q95LP1       | Kif 2C                       | <i>M. fascicularis</i> | 671                           | M                  | 203-532      | (148) |
| 75066639  | QtsA-10833,<br>QtsA-13688,<br>QtsA-18420 | Q95LT1       | Kif 2B                       | <i>M. fascicularis</i> | 670                           | M                  | 209-538      | (148) |
| 75076234  | QtsA-19288                               | Q4R628       | Kif 3A                       | <i>M. fascicularis</i> | 702                           | N                  | 13-345       | (149) |
| 109003659 | XM_001093746                             | XP_001093746 |                              | <i>M. mulatta</i>      | 706                           | M                  | 238-567      | (150) |
| 109073318 | XM_001085776                             | XP_001085776 |                              | <i>M. mulatta</i>      | 601                           | C                  | 186-583      | (150) |
| 109092967 | XM_001086226                             | XP_001086226 |                              | <i>M. mulatta</i>      | 1317                          | N                  | 2-365        | (150) |
| 109116126 | XM_001102269                             | XP_001102269 |                              | <i>M. mulatta</i>      | 881                           | N                  | 21-351       | (150) |
| 109128063 | XM_001104446                             | XP_001104446 |                              | <i>M. mulatta</i>      | 671                           | N                  | 49-355       | (150) |
| 39944768  | XM_361921                                | XP_361921    | putative protein             | <i>M. grisea</i>       | 972                           | M                  | 212-569      | (151) |
| 39973337  | XM_368059                                | XP_368059    | putative protein             | <i>M. grisea</i>       | 733                           | N                  | 2-330        | (151) |
| 145605477 | XM_364410                                | XP_364410    | putative protein             | <i>M. grisea</i>       | 1771                          | N                  | 4-360        | (151) |
| 145605820 | XM_370342                                | XP_370342    | putative protein             | <i>M. grisea</i>       | 1068                          | N                  | 40-373       | (151) |
| 145612205 | XM_362573                                | XP_362573    | putative protein             | <i>M. grisea</i>       | 614                           | N                  | 49-413       | (151) |
| 145613277 | XM_363831                                | XP_363831    | putative protein             | <i>M. grisea</i>       | 937                           | N                  | 4-329        | (151) |
| 145614060 | XM_363249                                | XP_363249    | putative protein             | <i>M. grisea</i>       | 1115                          | N                  | 27-370       | (151) |
| 122231692 |                                          | Q1RYB8       | kinesin-related protein tck1 | <i>M. truncatula</i>   | 1254                          | C                  | 873-1204     | (152) |
| 122231751 |                                          | Q1S664       | kinesin                      | <i>M. truncatula</i>   | 665                           | N                  | 23-386       | (152) |
| 122237914 |                                          | Q1SGR1       | kinesin                      | <i>M. truncatula</i>   | 801                           | C                  | 432-782      | (152) |
| 122244246 |                                          | Q1S9J2       | kinesin                      | <i>M. truncatula</i>   | 1073                          | N                  | 87-414       | (152) |
| 122248245 |                                          | Q1SEG1       | plant kinesin-like protein   | <i>M. truncatula</i>   | 1265                          | C                  | 887-1218     | (152) |
| 124359768 | AC150799                                 | ABN06095     | kinesin                      | <i>M. truncatula</i>   | 625                           | N                  | 87-425       | (152) |
| 126307535 | XM_001369332                             | XP_001369369 | no ID                        | <i>M. domestica</i>    | 682                           | M                  | 224-553      | (153) |

| GI        | Gene ID        | NCBI Prot ID | Protein Name                    | Taxa                   | No. aa in full length protein | Motor type (N/M/C) | Motor domain | Ref.  |
|-----------|----------------|--------------|---------------------------------|------------------------|-------------------------------|--------------------|--------------|-------|
| 126309847 | XM_001377630   | XP_001377667 | no ID                           | <i>M. domestica</i>    | 770                           | C                  | 402-763      | (153) |
| 126323074 | XM_001372120   | XP_001372157 | no ID                           | <i>M. domestica</i>    | 820                           | C                  | 437-768      | (153) |
| 126335571 | XM_001368067   | XP_001368104 | no ID                           | <i>M. domestica</i>    | 670                           | N                  | 61-366       | (153) |
| 126341392 | XM_001374859   | XP_001374896 | no ID                           | <i>M. domestica</i>    | 1054                          | N                  | 6-325        | (153) |
| 126341614 | XM_001379339   | XP_001379376 | no ID                           | <i>M. domestica</i>    | 1399                          | N                  | 25-364       | (153) |
| 126342775 | XM_001368376   | XP_001368413 | no ID                           | <i>M. domestica</i>    | 1231                          | N                  | 8-339        | (153) |
| 1762638   | MSU64819       | AAB39558     | microtubule-based motor protein | <i>M. saxatilis</i>    | 773                           | C                  | 369-690      | (154) |
| 125403    |                | P28741       | Kif 3A                          | <i>M. musculus</i>     | 701                           | N                  | 13-345       | (155) |
| 1170659   |                | P33174       | Kif 4                           | <i>M. musculus</i>     | 1231                          | N                  | 8-335        | (156) |
| 1944330   | D49545         | BAA19677     | Kif C2                          | <i>M. musculus</i>     | 792                           | C                  | 407-735      | (157) |
| 2497519   |                | Q61768       | KINH                            | <i>M. musculus</i>     | 963                           | N                  | 6-325        | (158) |
| 2506794   | NM_008440      | P33173       | Kif 1A, isoform A               | <i>M. musculus</i>     | 1695                          | N                  | 4-361        | (159) |
| 3122327   |                | Q61771       | Kif 3B                          | <i>M. musculus</i>     | 747                           | N                  | 18-340       | (160) |
| 3913959   |                | O35066       | Kif 3C                          | <i>M. musculus</i>     | 796                           | N                  | 9-367        | (161) |
| 6979905   | AF221102       | AF221102_1   | KIFC5A                          | <i>M. musculus</i>     | 674                           | C                  | 309-667      | (162) |
| 9297100   |                | P28738       | Kif 5C                          | <i>M. musculus</i>     | 956                           | N                  | 6-327        | (163) |
| 12644454  |                | Q60575       | Kif 1B                          | <i>M. musculus</i>     | 1816                          | N                  | 4-361        | (164) |
| 18203576  | 16578          | Q9WV04       | Kif 9                           | <i>M. musculus</i>     | 790                           | N                  | 6-338        | (165) |
| 23396622  |                | Q9EQW7       | Kif 13A                         | <i>M. musculus</i>     | 1749                          | N                  | 4-359        | (166) |
| 23396634  | 16559          | Q99PW8       | Kif 17                          | <i>M. musculus</i>     | 1038                          | N                  | 4-335        | (167) |
| 29840788  |                | Q922S8       | Kif 2C                          | <i>M. musculus</i>     | 721                           | M                  | 253-582      | (118) |
| 32699612  | 16552          | Q9D2Z8       | Kif 12                          | <i>M. musculus</i>     | 642                           | N                  | 25-358       | (168) |
| 50401186  | 16565          | Q9QXL1       | Kif 21B                         | <i>M. musculus</i>     | 1668                          | N                  | 7-372        | (169) |
| 50401187  | 16564          | Q9QXL2       | Kif 21A                         | <i>M. musculus</i>     | 1672                          | N                  | 8-372        | (169) |
| 68570276  | 228421         | Q91WD7       | Kif 18A                         | <i>M. musculus</i>     | 886                           | N                  | 11-355       | (168) |
| 77416870  | 16562          | O35071       | Kif 1C                          | <i>M. musculus</i>     | 1100                          | N                  | 4-355        | (165) |
| 81892355  | 209737         | Q6P9L6       | Kif 15                          | <i>M. musculus</i>     | 1387                          | N                  | 25-363       | (170) |
| 81892361  | 16551          | Q6P9P6       | Kif 11                          | <i>M. musculus</i>     | 1052                          | N                  | 15-367       | (118) |
| 81892832  | 229841         | Q6RT24       | CENPE                           | <i>M. musculus</i>     | 2474                          | N                  | 6-329        | (171) |
| 81894342  | 75050          | Q7M6Z4       | Kif 27                          | <i>M. musculus</i>     | 1394                          | N                  | 4-342        | (118) |
| 81898327  | 73470          | Q8C0N1       | Kif 2B                          | <i>M. musculus</i>     | 668                           | M                  | 212-541      | (168) |
| 109940092 | 16572          | P33175       | Kif 5A                          | <i>M. musculus</i>     | 1027                          | N                  | 7-327        | (172) |
| 118572490 | 110033         | Q3V300       | Kif 22                          | <i>M. musculus</i>     | 660                           | N                  | 48-361       | (118) |
| 123284070 | AL663079       | CAM19254     | novel protein                   | <i>M. musculus</i>     | 710                           | N                  | 11-304       |       |
| 124056472 | 16582          | O35231       | Kif C3                          | <i>M. musculus</i>     | 824                           | C                  | 441-769      | (173) |
| 124487163 | NM_001081177   | NP_001074646 | KIF13B                          | <i>M. musculus</i>     | 1843                          | N                  | 4-360        | (165) |
| 126215733 | 109242         | Q6NWW5       | Kif 24                          | <i>M. musculus</i>     | 1356                          | M                  | 217-539      | (168) |
| 156564374 | NM_177052      | NP_796026    | KIF6                            | <i>M. musculus</i>     | 802                           | N                  | 5-343        | (165) |
| 156616322 | NM_001102615.1 | NP_001096085 | Kif19A                          | <i>M. musculus</i>     | 997                           | N                  | 11-346       | (174) |
| 158564068 |                | Q9QWT9       | KIFC1                           | <i>M. musculus</i>     | 674                           | C                  | 309-667      | (157) |
| 158931128 | 16563          | P28740       | Kif 2A                          | <i>M. musculus</i>     | 705                           | M                  | 221-550      | (155) |
| 160013076 | 668303         | Q52KG5       | Kif 26A                         | <i>M. musculus</i>     | 1881                          | M                  | 364-716      | (174) |
| 160013784 | 269152         | Q7TNC6       | Kif 26B                         | <i>M. musculus</i>     | 2112                          | M                  | 450-798      | (118) |
| 189046786 | 70218          | Q6PFD6       | Kif 18B                         | <i>M. musculus</i>     | 834                           | N                  | 18-353       | (168) |
| 254553479 | NM_010626      | NP_034756    | KIF7                            | <i>M. musculus</i>     | 1347                          | N                  | 14-350       | (165) |
| 1839174   | NHU86521       | AAB47851     | kinesin                         | <i>N. haematococca</i> | 929                           | N                  | 4-329        | (175) |
| 119472836 | XM_001258424   | XP_001258425 | kinesin family protein          | <i>N. fischeri</i>     | 690                           | N                  | 2-351        | (55)  |
| 119473281 | XM_001258550   | XP_001258551 | kinesin heavy chain subunit     | <i>N. fischeri</i>     | 872                           | N                  | 1-270        | (55)  |
| 119478417 | XM_001259364   | XP_001259365 | kinesin family protein          | <i>N. fischeri</i>     | 1748                          | N                  | 50-441       | (55)  |
| 119478542 | XM_001259385   | XP_001259386 | kinesin family protein          | <i>N. fischeri</i>     | 655                           | N                  | 92-449       | (55)  |
| 119481813 | XM_001260934   | XP_001260935 | kinesin family protein          | <i>N. fischeri</i>     | 1619                          | N                  | 7-356        | (55)  |
| 119482528 | XM_001261291   | XP_001261292 | kinesin family protein (KipA)   | <i>N. fischeri</i>     | 955                           | M                  | 214-570      | (55)  |
| 119488650 | XM_001262774   | XP_001262775 | kinesin family protein (BimC)   | <i>N. fischeri</i>     | 1190                          | N                  | 75-419       | (55)  |
| 119498243 | XM_001265878   | XP_001265879 | kinesin family protein          | <i>N. fischeri</i>     | 1009                          | N                  | 9-379        | (55)  |

| GI        | Gene ID      | NCBI Prot ID | Protein Name                        | Taxa                    | No. aa in full length protein | Motor type (N/M/C) | Motor domain | Ref.  |
|-----------|--------------|--------------|-------------------------------------|-------------------------|-------------------------------|--------------------|--------------|-------|
| 6016437   | 3880594      | P48467       | KINH                                | <i>N. crassa</i>        | 928                           | N                  | 5-330        | (176) |
| 1491931   | NTU52078     | AAC49393     | kinesin-like protein                | <i>N. tabacum</i>       | 1265                          | C                  | 887-1213     | (177) |
| 11132775  |              | O23826       | K125                                | <i>N. tabacum</i>       | 1006                          | N                  | 7-364        | (178) |
| 149409204 | XM_001513504 | XP_001513554 | similar to Flj37300-A-prov          | <i>O. anatinus</i>      | 1018                          | N                  | 14-351       | (179) |
| 149409521 | XM_001510950 | XP_001511000 | similar to HSPC111                  | <i>O. anatinus</i>      | 709                           | N                  | 11-354       | (179) |
| 149413988 | XM_001518095 | XP_001518145 | similar to KIF27A                   | <i>O. anatinus</i>      | 523                           | N                  | 4-337        | (179) |
| 149481063 | XM_001521357 | XP_001521407 | hypothetical protein                | <i>O. anatinus</i>      | 763                           | M                  | 247-562      | (179) |
| 149632045 | XM_001513131 | XP_001513181 | similar to kinesin-like protein 2   | <i>O. anatinus</i>      | 1424                          | N                  | 53-391       | (179) |
| 149632525 | XM_001508207 | XP_001508257 | similar to KIF13A                   | <i>O. anatinus</i>      | 2000                          | N                  | 4-360        | (179) |
| 149632650 | XM_001510925 | XP_001510975 | similar to KIF19                    | <i>O. anatinus</i>      | 985                           | N                  | 71-404       | (179) |
| 149634753 | XM_001508079 | XP_001508129 | similar to kinesin heavy chain      | <i>O. anatinus</i>      | 965                           | N                  | 6-325        | (179) |
| 149635339 | XM_001506223 | XP_001506273 | similar to KIF2A                    | <i>O. anatinus</i>      | 959                           | M                  | 366-695      | (179) |
| 149636611 | XM_001509006 | XP_001509056 | hypothetical protein                | <i>O. anatinus</i>      | 787                           | M                  | 218-548      | (179) |
| 149638210 | XM_001510628 | XP_001510678 | KIF3A                               | <i>O. anatinus</i>      | 767                           | N                  | 38-370       | (179) |
| 149639091 | XM_001509719 | XP_001509769 | similar to kinesin family member 1B | <i>O. anatinus</i>      | 1770                          | N                  | 4-355        | (179) |
| 149640967 | XM_001515302 | XP_001515352 | C20orf23                            | <i>O. anatinus</i>      | 1325                          | N                  | 18-375       | (179) |
| 149641641 | XM_001513203 | XP_001513253 | hypothetical protein                | <i>O. anatinus</i>      | 1021                          | N                  | 5-359        | (179) |
| 149641649 | XM_001513391 | XP_001513441 | kinesin family member 26B           | <i>O. anatinus</i>      | 1982                          | M                  | 344-692      | (179) |
| 149642076 | XM_001515263 | XP_001515313 | KIF24                               | <i>O. anatinus</i>      | 1317                          | M                  | 184-506      | (179) |
| 75109919  | 4340046      | Q5VQ09       | Ark 2                               | <i>O. sativa</i>        | 891                           | N                  | 95-398       | (180) |
| 108705832 | DP000009     | ABF93627     | putative kinesin                    | <i>O. sativa</i>        | 622                           | N                  | 1-274        | (181) |
| 108707695 | DP000009     | ABF95490     | putative kinesin-4                  | <i>O. sativa</i>        | 1014                          | M                  | 388-712      | (181) |
| 108712245 | DP000009     | ABG00040     | putative kinesin-1                  | <i>O. sativa</i>        | 487                           | M                  | 92-389       | (181) |
| 115438358 | NM_001050055 | NP_001043520 | Os01g0605500                        | <i>O. sativa</i>        | 776                           | M                  | 205-534      | (182) |
| 115450791 | NM_001055531 | NP_001048996 | kinesin protein                     | <i>O. sativa</i>        | 993                           | N                  | 115-445      | (182) |
| 115460740 | NM_001060505 | NP_001053970 | Os04g0629700                        | <i>O. sativa</i>        | 788                           | C                  | 430-770      | (182) |
| 115464949 | NM_001062609 | NP_001056074 | Os05g0521300                        | <i>O. sativa</i>        | 926                           | M                  | 389-721      | (182) |
| 115474523 | NM_001067393 | NP_001060858 | Os08g0117000                        | <i>O. sativa</i>        | 549                           | N                  | 82-329       | (182) |
| 115488960 | NM_001073499 | NP_001066967 | Os12g0547500 protein                | <i>O. sativa</i>        | 954                           | M                  | 372-702      | (182) |
| 116310281 | CR855188     | CAH67300     | OSIGBa0102D1 0.3                    | <i>O. sativa</i>        | 1154                          | M                  | 119-437      | (183) |
| 116310358 | CR855195     | CAH67371     | OSIGBa0128P1 0.5                    | <i>O. sativa</i>        | 979                           | M                  | 346-664      | (183) |
| 125532696 | CM000135     | EAY79261     | putative protein                    | <i>O. sativa</i>        | 622                           | C                  | 226-560      | (184) |
| 125545868 | CM000128     | EAY92007     | putative protein                    | <i>O. sativa</i>        | 783                           | N                  | 14-349       | (184) |
| 125546553 | CM000128     | EAY92692     | putative protein                    | <i>O. sativa</i>        | 440                           | N                  | 92-426       | (184) |
| 125550139 | CM000129     | EAY95961     | putative protein                    | <i>O. sativa</i>        | 1274                          | C                  | 896-1222     | (184) |
| 125550610 | CM000130     | EAY96319     | putative protein                    | <i>O. sativa</i>        | 1056                          | N                  | 47-404       | (184) |
| 125553964 | CM000131     | EAY99569     | putative protein                    | <i>O. sativa</i>        | 891                           | N                  | 95-398       | (184) |
| 125560717 | CM000133     | EAZ06165     | putative protein                    | <i>O. sativa</i>        | 549                           | N                  | 74-333       | (184) |
| 125560719 | CM000133     | EAZ06167     | putative protein                    | <i>O. sativa</i>        | 604                           | N                  | 61-388       | (184) |
| 125569796 | CM000138     | EAZ11311     | putative protein                    | <i>O. sativa</i>        | 793                           | N                  | 93-420       | (184) |
| 125575383 | CM000147     | EAZ16667     | putative protein                    | <i>O. sativa</i>        | 1071                          | M                  | 114-415      | (184) |
| 206557943 | 4331654      | Q0DV28       | Ark 1                               | <i>O. sativa</i>        | 945                           | N                  | 57-397       | (181) |
| 145345569 | XM_001417241 | XP_001417278 | predicted protein                   | <i>O. 'lucimarinus'</i> | 493                           | C                  | 110-433      | (185) |
| 145345868 | XM_001417384 | XP_001417421 | predicted protein                   | <i>O. 'lucimarinus'</i> | 781                           | N                  | 18-376       | (185) |
| 145348596 | XM_001418695 | XP_001418732 | predicted protein                   | <i>O. 'lucimarinus'</i> | 384                           | N                  | 44-373       | (185) |
| 145351435 | XM_001420047 | XP_001420084 | predicted protein                   | <i>O. 'lucimarinus'</i> | 393                           | N                  | 52-383       | (185) |

| GI        | Gene ID      | NCBI Prot ID | Protein Name                | Taxa                    | No. aa in full length protein | Motor type (N/M/C) | Motor domain | Ref.  |
|-----------|--------------|--------------|-----------------------------|-------------------------|-------------------------------|--------------------|--------------|-------|
| 145351791 | XM_001420209 | XP_001420246 | predicted protein           | <i>O. 'lucimarinus'</i> | 1109                          | C                  | 733-1061     | (185) |
| 116057025 | CR954204     | CAL51452     | kinesin                     | <i>O. tauri</i>         | 771                           | N                  | 8-370        | (186) |
| 116057299 | CR954204     | CAL51726     | kinesin-like protein B      | <i>O. tauri</i>         | 2739                          | C                  | 2379-2689    | (186) |
| 116057438 | CR954204     | CAL51865     | kinesin protein             | <i>O. tauri</i>         | 689                           | N                  | 93-426       | (186) |
| 116057919 | CR954205     | CAL54122     | kinesin-like protein        | <i>O. tauri</i>         | 500                           | N                  | 43-368       | (186) |
| 116058861 | CR954207     | CAL54568     | kinesin                     | <i>O. tauri</i>         | 979                           | N                  | 54-378       | (186) |
| 116059118 | CR954208     | CAL54825     | kinesin-like protein KRP180 | <i>O. tauri</i>         | 1234                          | N                  | 8-382        | (186) |
| 116059314 | CR954208     | CAL55021     | Kinesin                     | <i>O. tauri</i>         | 1310                          | C                  | 904-1231     | (186) |
| 116059965 | CR954210     | CAL56024     | OSJNBa0089N0 6.17           | <i>O. tauri</i>         | 725                           | C                  | 384-714      | (186) |
| 116060309 | CR954211     | CAL55645     | kinesin-like protein        | <i>O. tauri</i>         | 1220                          | C                  | 841-1169     | (186) |
| 116060488 | CR954211     | CAL55824     | putative kinesin            | <i>O. tauri</i>         | 790                           | N                  | 37-424       | (186) |
| 114595517 | XM_001170275 | XP_001170275 |                             | <i>P. troglodytes</i>   | 2701                          | N                  | 6-329        | (187) |
| 114605632 | XM_001170727 | XP_001170727 | Kif 13A                     | <i>P. troglodytes</i>   | 1749                          | N                  | 4-359        | (187) |
| 114626328 | XM_520205    | XP_520205    |                             | <i>P. troglodytes</i>   | 620                           | N                  | 34-332       | (187) |
| 114644157 | XM_509167    | XP_509167    |                             | <i>P. troglodytes</i>   | 1028                          | N                  | 14-323       | (187) |
| 114656598 | XM_001144280 | XP_001144280 |                             | <i>P. troglodytes</i>   | 848                           | N                  | 2-391        | (187) |
| 114681460 | XM_001155482 | XP_001155482 | Kif 3B                      | <i>P. troglodytes</i>   | 747                           | N                  | 18-340       | (187) |
| 12055369  | AJ293506     | CAC20783     | kinesin-like boursin        | <i>P. lividus</i>       | 1081                          | N                  | 10-360       | (188) |
| 145478285 | XM_001425128 | XP_001425165 | Chromosome scaffold_107     | <i>P. tetraurelia</i>   | 773                           | N                  | 6-328        | (189) |
| 145478411 | XM_001425191 | XP_001425228 | Chromosome scaffold_107     | <i>P. tetraurelia</i>   | 1008                          | N                  | 14-347       | (189) |
| 145479171 | XM_001425571 | XP_001425608 | Chromosome scaffold_109     | <i>P. tetraurelia</i>   | 731                           | N                  | 7-346        | (189) |
| 145480021 | XM_001425996 | XP_001426033 | Chromosome scaffold_11      | <i>P. tetraurelia</i>   | 721                           | N                  | 6-337        | (189) |
| 145480537 | XM_001426254 | XP_001426291 | Chromosome scaffold_111     | <i>P. tetraurelia</i>   | 773                           | N                  | 3-354        | (189) |
| 145480545 | XM_001426258 | XP_001426295 | Chromosome scaffold_111     | <i>P. tetraurelia</i>   | 767                           | N                  | 7-342        | (189) |
| 145480699 | XM_001426335 | XP_001426372 | Chromosome scaffold_111     | <i>P. tetraurelia</i>   | 641                           | N                  | 52-383       | (189) |
| 145481219 | XM_001426595 | XP_001426632 | Chromosome scaffold_113     | <i>P. tetraurelia</i>   | 787                           | N                  | 4-326        | (189) |
| 145481461 | XM_001426716 | XP_001426753 | Chromosome scaffold_114     | <i>P. tetraurelia</i>   | 782                           | N                  | 11-335       | (189) |
| 145481667 | XM_001426819 | XP_001426856 | Chromosome scaffold_114     | <i>P. tetraurelia</i>   | 704                           | N                  | 22-324       | (189) |
| 145481901 | XM_001426936 | XP_001426973 | Chromosome scaffold_115     | <i>P. tetraurelia</i>   | 798                           | N                  | 4-334        | (189) |
| 145482705 | XM_001427338 | XP_001427375 | Chromosome scaffold_118     | <i>P. tetraurelia</i>   | 654                           | N                  | 48-371       | (189) |
| 145482763 | XM_001427367 | XP_001427404 | Chromosome scaffold_118     | <i>P. tetraurelia</i>   | 761                           | N                  | 4-334        | (189) |
| 145482939 | XM_001427455 | XP_001427492 | Chromosome scaffold_118     | <i>P. tetraurelia</i>   | 544                           | N                  | 4-281        | (189) |
| 145482983 | XM_001427477 | XP_001427514 | Chromosome scaffold_118     | <i>P. tetraurelia</i>   | 800                           | N                  | 21-361       | (189) |
| 145483965 | XM_001427968 | XP_001428005 | Chromosome scaffold_12      | <i>P. tetraurelia</i>   | 775                           | N                  | 12-361       | (189) |
| 145484348 | XM_001428147 | XP_001428184 | Chromosome scaffold_120     | <i>P. tetraurelia</i>   | 800                           | N                  | 4-334        | (189) |
| 145484858 | XM_001428401 | XP_001428438 | Chromosome scaffold_122     | <i>P. tetraurelia</i>   | 798                           | N                  | 11-337       | (189) |
| 145485032 | XM_001428488 | XP_001428525 | Chromosome scaffold_122     | <i>P. tetraurelia</i>   | 710                           | N                  | 22-332       | (189) |
| 145485173 | XM_001428558 | XP_001428595 | Chromosome scaffold_123     | <i>P. tetraurelia</i>   | 496                           | C                  | 186-494      | (189) |

| GI        | Gene ID      | NCBI Prot ID | Protein Name            | Taxa                  | No. aa in full length protein | Motor type (N/M/C) | Motor domain | Ref.  |
|-----------|--------------|--------------|-------------------------|-----------------------|-------------------------------|--------------------|--------------|-------|
| 145485614 | XM_001428778 | XP_001428815 | Chromosome scaffold_124 | <i>P. tetraurelia</i> | 601                           | N                  | 16-355       | (189) |
| 145485949 | XM_001428945 | XP_001428982 | Chromosome scaffold_125 | <i>P. tetraurelia</i> | 643                           | N                  | 4-326        | (189) |
| 145486104 | XM_001429022 | XP_001429059 | Chromosome scaffold_126 | <i>P. tetraurelia</i> | 776                           | N                  | 3-373        | (189) |
| 145486638 | XM_001429288 | XP_001429325 | Chromosome scaffold_128 | <i>P. tetraurelia</i> | 794                           | N                  | 6-336        | (189) |
| 145486720 | XM_001429329 | XP_001429366 | Chromosome scaffold_128 | <i>P. tetraurelia</i> | 736                           | N                  | 5-337        | (189) |
| 145486941 | XM_001429439 | XP_001429476 | Chromosome scaffold_129 | <i>P. tetraurelia</i> | 747                           | N                  | 2-291        | (189) |
| 145495173 | XM_001433543 | XP_001433580 | Chromosome scaffold_150 | <i>P. tetraurelia</i> | 714                           | N                  | 21-253       | (189) |
| 145495671 | XM_001433791 | XP_001433828 | Chromosome scaffold_152 | <i>P. tetraurelia</i> | 965                           | N                  | 3-348        | (189) |
| 145498610 | XM_001435255 | XP_001435292 | Chromosome scaffold_162 | <i>P. tetraurelia</i> | 704                           | N                  | 1-313        | (189) |
| 145499231 | XM_001435564 | XP_001435601 | Chromosome scaffold_165 | <i>P. tetraurelia</i> | 558                           | N                  | 20-305       | (189) |
| 145499886 | XM_001435890 | XP_001435927 | Chromosome scaffold_168 | <i>P. tetraurelia</i> | 558                           | N                  | 3-312        | (189) |
| 145503258 | XM_001437569 | XP_001437606 | Chromosome scaffold_180 | <i>P. tetraurelia</i> | 802                           | N                  | 41-387       | (189) |
| 145507993 | XM_001439909 | XP_001439946 | Chromosome scaffold_23  | <i>P. tetraurelia</i> | 509                           | N                  | 1-336        | (189) |
| 145512407 | XM_001442083 | XP_001442120 | Chromosome scaffold_29  | <i>P. tetraurelia</i> | 616                           | N                  | 18-356       | (189) |
| 145513366 | XM_001442557 | XP_001442594 | Chromosome scaffold_3   | <i>P. tetraurelia</i> | 785                           | N                  | 13-361       | (189) |
| 145513390 | XM_001442569 | XP_001442606 | Chromosome scaffold_3   | <i>P. tetraurelia</i> | 1351                          | N                  | 10-333       | (189) |
| 145514045 | XM_001442896 | XP_001442933 | Chromosome scaffold_30  | <i>P. tetraurelia</i> | 772                           | N                  | 29-375       | (189) |
| 145514776 | XM_001443256 | XP_001443293 | Chromosome scaffold_31  | <i>P. tetraurelia</i> | 783                           | N                  | 29-382       | (189) |
| 145515403 | XM_001443564 | XP_001443601 | Chromosome scaffold_32  | <i>P. tetraurelia</i> | 1837                          | N                  | 9-324        | (189) |
| 145516579 | XM_001444141 | XP_001444178 | Chromosome scaffold_34  | <i>P. tetraurelia</i> | 707                           | N                  | 3-310        | (189) |
| 145516709 | XM_001444206 | XP_001444243 | Chromosome scaffold_34  | <i>P. tetraurelia</i> | 632                           | N                  | 6-328        | (189) |
| 145517013 | XM_001444358 | XP_001444395 | Chromosome scaffold_34  | <i>P. tetraurelia</i> | 635                           | N                  | 6-314        | (189) |
| 145517416 | XM_001444554 | XP_001444591 | Chromosome scaffold_35  | <i>P. tetraurelia</i> | 857                           | M                  | 155-467      | (189) |
| 145520032 | XM_001445840 | XP_001445877 | Chromosome scaffold_39  | <i>P. tetraurelia</i> | 508                           | N                  | 6-342        | (189) |
| 145523511 | XM_001447557 | XP_001447594 | Chromosome scaffold_43  | <i>P. tetraurelia</i> | 983                           | N                  | 24-349       | (189) |
| 145523762 | XM_001447677 | XP_001447714 | Chromosome scaffold_44  | <i>P. tetraurelia</i> | 1033                          | N                  | 37-360       | (189) |
| 145524479 | XM_001448030 | XP_001448067 | Chromosome scaffold_45  | <i>P. tetraurelia</i> | 1403                          | N                  | 15-343       | (189) |
| 145526014 | XM_001448781 | XP_001448818 | Chromosome scaffold_48  | <i>P. tetraurelia</i> | 638                           | N                  | 6-310        | (189) |
| 145530273 | XM_001450877 | XP_001450914 | Chromosome scaffold_54  | <i>P. tetraurelia</i> | 1892                          | N                  | 11-334       | (189) |
| 145530291 | XM_001450886 | XP_001450923 | Chromosome scaffold_54  | <i>P. tetraurelia</i> | 633                           | N                  | 81-364       | (189) |
| 145531577 | XM_001451518 | XP_001451555 | Chromosome scaffold_56  | <i>P. tetraurelia</i> | 522                           | C                  | 210-490      | (189) |
| 145532563 | XM_001452000 | XP_001452037 | Chromosome scaffold_58  | <i>P. tetraurelia</i> | 784                           | M                  | 295-610      | (189) |
| 145534436 | XM_001452925 | XP_001452962 | Chromosome scaffold_60  | <i>P. tetraurelia</i> | 995                           | N                  | 4-312        | (189) |

| GI        | Gene ID      | NCBI Prot ID | Protein Name                        | Taxa                     | No. aa in full length protein | Motor type (N/M/C) | Motor domain | Ref.  |
|-----------|--------------|--------------|-------------------------------------|--------------------------|-------------------------------|--------------------|--------------|-------|
| 145535285 | XM_001453344 | XP_001453381 | Chromosome scaffold_61              | <i>P. tetraurelia</i>    | 707                           | N                  | 3-310        | (189) |
| 145536476 | XM_001453923 | XP_001453960 | Chromosome scaffold_64              | <i>P. tetraurelia</i>    | 553                           | N                  | 5-337        | (189) |
| 145537201 | XM_001454280 | XP_001454317 | Chromosome scaffold_65              | <i>P. tetraurelia</i>    | 489                           | N                  | 4-319        | (189) |
| 145538163 | XM_001454750 | XP_001454787 | Chromosome scaffold_67              | <i>P. tetraurelia</i>    | 980                           | N                  | 2-329        | (189) |
| 145539930 | XM_001455618 | XP_001455655 | Chromosome scaffold_7               | <i>P. tetraurelia</i>    | 1366                          | N                  | 10-340       | (189) |
| 145540285 | XM_001455795 | XP_001455832 | Chromosome scaffold_70              | <i>P. tetraurelia</i>    | 727                           | N                  | 5-342        | (189) |
| 145540391 | XM_001455848 | XP_001455885 | Chromosome scaffold_70              | <i>P. tetraurelia</i>    | 686                           | N                  | 35-301       | (189) |
| 145540395 | XM_001455850 | XP_001455887 | Chromosome scaffold_70              | <i>P. tetraurelia</i>    | 1138                          | N                  | 4-365        | (189) |
| 145540613 | XM_001455959 | XP_001455996 | Chromosome scaffold_70              | <i>P. tetraurelia</i>    | 818                           | N                  | 25-363       | (189) |
| 145541287 | XM_001456295 | XP_001456332 | Chromosome scaffold_72              | <i>P. tetraurelia</i>    | 517                           | N                  | 6-342        | (189) |
| 145541301 | XM_001456302 | XP_001456339 | Chromosome scaffold_72              | <i>P. tetraurelia</i>    | 1798                          | N                  | 39-354       | (189) |
| 145541319 | XM_001456311 | XP_001456348 | Chromosome scaffold_72              | <i>P. tetraurelia</i>    | 631                           | N                  | 81-364       | (189) |
| 145541646 | XM_001456474 | XP_001456511 | Chromosome scaffold_73              | <i>P. tetraurelia</i>    | 1127                          | N                  | 1-361        | (189) |
| 145542949 | XM_001457124 | XP_001457161 | Chromosome scaffold_76              | <i>P. tetraurelia</i>    | 980                           | N                  | 3-320        | (189) |
| 145543304 | XM_001457301 | XP_001457338 | Chromosome undetermined scaffold_77 | <i>P. tetraurelia</i>    | 594                           | N                  | 6-340        | (189) |
| 145543765 | XM_001457531 | XP_001457568 | Chromosome scaffold_78              | <i>P. tetraurelia</i>    | 1117                          | N                  | 4-344        | (189) |
| 145544030 | XM_001457663 | XP_001457700 | Chromosome scaffold_79              | <i>P. tetraurelia</i>    | 563                           | N                  | 5-346        | (189) |
| 145544264 | XM_001457780 | XP_001457817 | Chromosome scaffold_79              | <i>P. tetraurelia</i>    | 980                           | N                  | 3-320        | (189) |
| 145545237 | XM_001458266 | XP_001458303 | Chromosome scaffold_8               | <i>P. tetraurelia</i>    | 733                           | N                  | 4-320        | (189) |
| 145545598 | XM_001458446 | XP_001458483 | Chromosome scaffold_80              | <i>P. tetraurelia</i>    | 711                           | N                  | 3-355        | (189) |
| 145546400 | XM_001458846 | XP_001458883 | Chromosome scaffold_82              | <i>P. tetraurelia</i>    | 507                           | N                  | 6-307        | (189) |
| 145549630 | XM_001460457 | XP_001460494 | Chromosome scaffold_9               | <i>P. tetraurelia</i>    | 490                           | N                  | 4-319        | (189) |
| 145550413 | XM_001460848 | XP_001460885 | Chromosome scaffold_90              | <i>P. tetraurelia</i>    | 592                           | N                  | 6-340        | (189) |
| 145551081 | XM_001461181 | XP_001461218 | Chromosome scaffold_92              | <i>P. tetraurelia</i>    | 587                           | N                  | 18-356       | (189) |
| 145551276 | XM_001461278 | XP_001461315 | Chromosome scaffold_93              | <i>P. tetraurelia</i>    | 812                           | N                  | 21-368       | (189) |
| 145551434 | XM_001461357 | XP_001461394 | Chromosome scaffold_93              | <i>P. tetraurelia</i>    | 1076                          | N                  | 3-357        | (189) |
| 145552523 | XM_001461900 | XP_001461937 | Chromosome scaffold_96              | <i>P. tetraurelia</i>    | 660                           | N                  | 6-329        | (189) |
| 145553128 | XM_001462202 | XP_001462239 | Chromosome scaffold_97              | <i>P. tetraurelia</i>    | 758                           | N                  | 38-356       | (189) |
| 169594924 | XM_001790834 | XP_001790886 | putative protein                    | <i>P. nodorum</i>        | 1022                          | N                  | 8-403        | (190) |
| 169595346 | XM_001791045 | XP_001791097 | putative protein                    | <i>P. nodorum</i>        | 1168                          | N                  | 57-403       | (190) |
| 169600633 | XM_001793687 | XP_001793739 | putative protein                    | <i>P. nodorum</i>        | 745                           | N                  | 2-331        | (190) |
| 169601428 | XM_001794084 | XP_001794136 | putative protein                    | <i>P. nodorum</i>        | 728                           | M                  | 17-374       | (190) |
| 169606994 | XM_001796865 | XP_001796917 | putative protein                    | <i>P. nodorum</i>        | 954                           | N                  | 16-333       | (190) |
| 169608075 | XM_001797405 | XP_001797457 | putative protein                    | <i>P. nodorum</i>        | 1660                          | N                  | 52-436       | (190) |
| 169614451 | XM_001800590 | XP_001800642 | putative protein                    | <i>P. nodorum</i>        | 558                           | N                  | 9-356        | (190) |
| 169625889 | XM_001806295 | XP_001806347 | putative protein                    | <i>P. nodorum</i>        | 450                           | M                  | 181-436      | (190) |
| 190345690 | CH408156     | EDK37617     | putative protein                    | <i>P. guilliermondii</i> | 531                           | N                  | 28-358       | (146) |



| GI        | Gene ID      | NCBI Prot ID       | Protein Name                     | Taxa                     | No. aa in full length protein | Motor type (N/M/C) | Motor domain | Ref.  |
|-----------|--------------|--------------------|----------------------------------|--------------------------|-------------------------------|--------------------|--------------|-------|
| 190345935 | CH408156     | EDK37907           | putative protein                 | <i>P. guilliermondii</i> | 770                           | N                  | 9-376        | (146) |
| 190347243 | CH408158     | EDK39482           | putative protein                 | <i>P. guilliermondii</i> | 666                           | M                  | 117-440      | (146) |
| 190348916 | CH408161     | EDK41470           | putative protein                 | <i>P. guilliermondii</i> | 871                           | N                  | 1-369        | (146) |
| 150863921 | XM_001382530 | XP_001382567       | predicted protein                | <i>P. stipitis</i>       | 749                           | N                  | 52-379       | (191) |
| 150863948 | XM_001382566 | XP_001382603       | predicted protein                | <i>P. stipitis</i>       | 912                           | N                  | 22-402       | (191) |
| 150864534 | XM_001383349 | XP_001383386       | predicted protein                | <i>P. stipitis</i>       | 532                           | N                  | 7-387        | (191) |
| 150866075 | XM_001385514 | XP_001385551       | predicted protein                | <i>P. stipitis</i>       | 907                           | N                  | 1-383        | (191) |
| 124505045 | XM_001351228 | XP_001351264       | putative kinesin                 | <i>P. falciparum</i>     | 1200                          | M                  | 258-587      | (192) |
| 156094934 | XM_001613453 | XP_001613503       | putative kinesin                 | <i>P. vivax</i>          | 794                           | M                  | 74-395       | (193) |
| 156094979 | XM_001613475 | XP_001613525       | putative kinesin                 | <i>P. vivax</i>          | 1490                          | M                  | 797-1132     | (193) |
| 156095883 | XM_001613926 | XP_001613976       | putative kinesin                 | <i>P. vivax</i>          | 1103                          | N                  | 42-370       | (193) |
| 156096971 | XM_001614469 | XP_001614519       | putative kinesin                 | <i>P. vivax</i>          | 1285                          | M                  | 508-838      | (193) |
| 156099151 | XM_001615528 | XP_001615578       | kinesin protein                  | <i>P. vivax</i>          | 794                           | N                  | 4-364        | (193) |
| 156101780 | XM_001616533 | XP_001616583       | putative kinesin                 | <i>P. vivax</i>          | 1677                          | N                  | 26-422       | (193) |
| 75041752  | 100172845    | Q5R9K7             | Kif 5A                           | <i>P. abelii</i>         | 1032                          | N                  | 7-327        | (194) |
| 75061599  | 100173987    | Q5R4H3             | Kif 3A                           | <i>P. abelii</i>         | 702                           | N                  | 13-245       | (194) |
| 75061716  | 100169734    | Q5R706             | Kif 3C                           | <i>P. abelii</i>         | 793                           | N                  | 9-365        | (194) |
| 75061830  | 100174485    | Q5R9Y9             | Kif 2A                           | <i>P. abelii</i>         | 744                           | M                  | 222-551      | (194) |
| 75062021  | 100189644    | Q5REP4             | Kif 22                           | <i>P. abelii</i>         | 665                           | N                  | 60-366       | (194) |
| 90655955  | DQ444242     | ABD96574           | MCAK                             | <i>P. tridactylus</i>    | 728                           | M                  | 258-587      | (195) |
| 3913949   | 85248        | O55165             | Kif 3C                           | <i>R. norvegicus</i>     | 796                           | N                  | 9-367        | (196) |
| 12230206  | 113886       | O35787             | Kif 1C                           | <i>R. norvegicus</i>     | 1097                          | N                  | 4-354        | (197) |
| 19343354  | AF035952     | AAB88700           | KRP3A                            | <i>R. norvegicus</i>     | 486                           | N                  | 5-343        | (198) |
| 81883705  | 294286       | Q5XI63             | Kif C1                           | <i>R. norvegicus</i>     | 693                           | C                  | 328-686      | (118) |
| 81889019  | 293502       | Q5I0E8             | Kif 22                           | <i>R. norvegicus</i>     | 657                           | N                  | 48-358       | (118) |
| 81892770  | 314906       | Q6QLM7             | Kif 5A                           | <i>R. norvegicus</i>     | 1027                          | N                  | 7-327        | (133) |
| 81894343  | 246209       | Q7M6Z5             | Kif 27                           | <i>R. norvegicus</i>     | 1394                          | N                  | 4-342        | (199) |
| 81894691  | 353302       | Q7TSP2             | Kif 15                           | <i>R. norvegicus</i>     | 1385                          | N                  | 25-363       | (170) |
| 84028216  | 117548       | O88658             | Kif 1B                           | <i>R. norvegicus</i>     | 1816                          | N                  | 4-361        | (200) |
| 109892476 | 117550       | Q2PQA9             | KINH                             | <i>R. norvegicus</i>     | 963                           | N                  | 6-325        | (133) |
| 123785745 | 303575       | Q4KLL9             | Kif 18B                          | <i>R. norvegicus</i>     | 826                           | N                  | 18-353       | (118) |
| 157153636 | NM_001103352 | NP_001096822       | putative protein                 | <i>R. norvegicus</i>     | 753                           | C                  | 370-698      | (198) |
| 157819777 |              | NP_001101200       | Kif 5C                           | <i>R. norvegicus</i>     | 955                           | N                  | 6-327        | (201) |
| 158705884 |              | Q5XI51             | Kif 2B                           | <i>R. norvegicus</i>     | 664                           | M                  | 212-541      | (199) |
| 158705885 |              | Q9WV63             | Kif 2A                           | <i>R. norvegicus</i>     | 705                           | M                  | 221-550      | (199) |
| 294862506 | 171529       | KIF2C_RAT (Q62909) | Kif2C                            | <i>R. norvegicus</i>     | 671                           | M                  | 203-532      | (198) |
| 125417    | 852216       | P28742             | Kip 1                            | <i>S. cerevisiae</i>     | 1111                          | N                  | 50-418       | (202) |
| 125418    | 855948       | P28743             | Kip 2                            | <i>S. cerevisiae</i>     | 706                           | M                  | 102-493      | (202) |
| 417786    | 853783       | P32364             | SMY 1                            | <i>S. cerevisiae</i>     | 656                           | N                  | 27-362       | (203) |
| 1723958   | 852655       | P53086             | Kip 3                            | <i>S. cerevisiae</i>     | 805                           | N                  | 84-438       | (204) |
| 126417154 | EF441211     | ABO13867           | Kif C1                           | <i>S. salar</i>          | 625                           | C                  | 280-618      | (205) |
| 1706200   | 2542732      | P24339             | Cut 7                            | <i>S. pombe</i>          | 1085                          | N                  | 70-429       | (206) |
| 3219911   | 2540361      | O14343             | Klp 5                            | <i>S. pombe</i>          | 883                           | N                  | 6-390        | (207) |
| 15214062  | 2542195      | Q9US60             | Klp 3                            | <i>S. pombe</i>          | 554                           | N                  | 1-325        | (208) |
| 26395879  | 2539700      | O59751             | Klp 6                            | <i>S. pombe</i>          | 784                           | N                  | 6-389        | (207) |
| 51316544  | 2542849      | Q9UTL2             | Klp 8                            | <i>S. pombe</i>          | 511                           | N                  | 5-354        | (209) |
| 118573057 | 2539857      | Q1MTQ1             | Tea 2                            | <i>S. pombe</i>          | 628                           | M                  | 132-460      | (210) |
| 212288569 |              | Q1MTQ7             | Yog 1                            | <i>S. pombe</i>          | 633                           | N                  | 2-390        | (209) |
| 156035543 | XM_001585833 | XP_001585883       | putative protein                 | <i>S. sclerotiorum</i>   | 1174                          | N                  | 82-432       | (65)  |
| 156039912 | XM_001587013 | XP_001587063       | putative protein                 | <i>S. sclerotiorum</i>   | 712                           | N                  | 7-339        | (65)  |
| 156042468 | XM_001587741 | XP_001587791       | putative protein                 | <i>S. sclerotiorum</i>   | 735                           | N                  | 2-331        | (65)  |
| 156055018 | XM_001593383 | XP_001593433       | putative protein                 | <i>S. sclerotiorum</i>   | 747                           | N                  | 7-372        | (65)  |
| 156058135 | XM_001594941 | XP_001594991       | putative protein                 | <i>S. sclerotiorum</i>   | 987                           | M                  | 217-574      | (65)  |
| 156060675 | XM_001596210 | XP_001596260       | putative protein                 | <i>S. sclerotiorum</i>   | 1712                          | N                  | 29-416       | (65)  |
| 156061551 | XM_001596648 | XP_001596698       | kinesin heavy chain              | <i>S. sclerotiorum</i>   | 929                           | N                  | 2-323        | (65)  |
| 156064583 | XM_001598163 | XP_001598213       | putative protein                 | <i>S. sclerotiorum</i>   | 596                           | N                  | 54-402       | (65)  |
| 1369852   | POTKHCL      | AAB37756           | kinesin heavy chain-like protein | <i>S. tuberosum</i>      | 1265                          | C                  | 887-1213     | (211) |
| 547774    | 373178       | P35978             | KINH                             | <i>S. purpuratus</i>     | 1031                          | N                  | 6-325        | (212) |
| 1170652   | 373530       | P46871             | Krp 95                           | <i>S. purpuratus</i>     | 742                           | N                  | 7-339        | (213) |
| 1170653   | 373466       | P46872             | Krp 85                           | <i>S. purpuratus</i>     | 699                           | N                  | 9-335        | (213) |
| 74942707  | 373236       | Q9GYZ0             | Kif 15                           | <i>S. purpuratus</i>     | 1463                          | N                  | 17-354       | (214) |
| 6016438   |              | O43093             | KINH                             | <i>S. racemosum</i>      | 935                           | N                  | 4-329        | (215) |

| GI        | Gene ID      | NCBI Prot ID | Protein Name                | Taxa                  | No. aa in full length protein | Motor type (N/M/C) | Motor domain | Ref.  |
|-----------|--------------|--------------|-----------------------------|-----------------------|-------------------------------|--------------------|--------------|-------|
| 5640166   | AJ244020     | CAB51556     | kinesin-II homologue Q9U0D5 | <i>T. thermophila</i> | 735                           | N                  | 12-341       | (216) |
| 5679735   | AJ244021     | CAB51811     | kinesin-II homologue Q9U921 | <i>T. thermophila</i> | 697                           | N                  | 9-338        | (216) |
| 118394633 | XM_001029681 | XP_001029681 | kinesin protein             | <i>T. thermophila</i> | 769                           | N                  | 78-427       | (217) |
| 118395509 | XM_001030103 | XP_001030103 | kinesin protein             | <i>T. thermophila</i> | 2114                          | N                  | 93-496       | (217) |
| 146162423 | XM_001471116 | XP_001471166 | putative protein            | <i>T. thermophila</i> | 431                           | N                  | 40-357       | (217) |
| 146179605 | XM_001470861 | XP_001470911 | kinesin heavy chain         | <i>T. thermophila</i> | 721                           | N                  | 61-400       | (217) |
| 123388204 | XM_001299535 | XP_001299536 | kinesin protein             | <i>T. vaginalis</i>   | 511                           | N                  | 37-356       | (218) |
| 123396914 | XM_001300991 | XP_001300992 | kinesin protein             | <i>T. vaginalis</i>   | 659                           | N                  | 7-330        | (218) |
| 123411586 | XM_001303909 | XP_001303910 | kinesin protein             | <i>T. vaginalis</i>   | 584                           | N                  | 44-377       | (218) |
| 123421229 | XM_001305934 | XP_001305935 | kinesin protein             | <i>T. vaginalis</i>   | 670                           | N                  | 4-303        | (218) |
| 123448844 | XM_001313146 | XP_001313147 | kinesin protein             | <i>T. vaginalis</i>   | 657                           | N                  | 4-319        | (218) |
| 123455652 | XM_001315533 | XP_001315568 | kinesin protein             | <i>T. vaginalis</i>   | 651                           | N                  | 5-328        | (218) |
| 123473438 | XM_001319872 | XP_001319907 | kinesin protein             | <i>T. vaginalis</i>   | 679                           | N                  | 10-337       | (218) |
| 123474972 | XM_001320631 | XP_001320666 | kinesin protein             | <i>T. vaginalis</i>   | 657                           | N                  | 5-318        | (218) |
| 123479831 | XM_001323037 | XP_001323072 | kinesin protein             | <i>T. vaginalis</i>   | 647                           | M                  | 103-436      | (218) |
| 123490274 | XM_001325546 | XP_001325581 | kinesin protein             | <i>T. vaginalis</i>   | 660                           | N                  | 6-336        | (218) |
| 123492570 | XM_001326059 | XP_001326094 | kinesin protein             | <i>T. vaginalis</i>   | 487                           | N                  | 57-380       | (218) |
| 123497284 | XM_001327116 | XP_001327151 | kinesin protein             | <i>T. vaginalis</i>   | 566                           | N                  | 57-379       | (218) |
| 123505760 | XM_001329017 | XP_001329052 | kinesin protein             | <i>T. vaginalis</i>   | 659                           | N                  | 28-352       | (218) |
| 123507578 | XM_001329412 | XP_001329447 | kinesin protein             | <i>T. vaginalis</i>   | 696                           | N                  | 9-335        | (218) |
| 123974990 | XM_001314085 | XP_001314093 | kinesin protein             | <i>T. vaginalis</i>   | 754                           | N                  | 99-431       | (218) |
| 123976204 | XM_001330775 | XP_001330811 | kinesin protein             | <i>T. vaginalis</i>   | 726                           | N                  | 4-305        | (218) |
| 123976709 | XM_001314546 | XP_001314575 | kinesin protein             | <i>T. vaginalis</i>   | 469                           | N                  | 44-377       | (218) |
| 124001101 | XM_001276970 | XP_001276971 | kinesin protein             | <i>T. vaginalis</i>   | 678                           | N                  | 8-338        | (218) |
| 154413434 | XM_001579697 | XP_001579747 | kinesin protein             | <i>T. vaginalis</i>   | 674                           | N                  | 9-335        | (218) |
| 11245496  | AF319546     | AAG33641     | Kif C1                      | <i>T. brucei</i>      | 820                           | C                  | 487-814      | (219) |
| 2062750   | UMU92844     | AAB63336     | kinesin protein             | <i>U. maydis</i>      | 1459                          | M                  | 2-333        | (220) |
| 2062752   | UMU92845     | AAB63337     | kinesin protein             | <i>U. maydis</i>      | 968                           | N                  | 2-333        | (220) |
| 147774373 | AM461173     | CAN72398     | putative protein            | <i>V. vinifera</i>    | 1824                          | M                  | 994-1292     | (221) |
| 147783402 | AM479280     | CAN75214     | putative protein            | <i>V. vinifera</i>    | 1219                          | N                  | 92-412       | (221) |
| 147791474 | AM458293     | CAN74504     | putative protein            | <i>V. vinifera</i>    | 1058                          | M                  | 422-761      | (221) |
| 147798215 | AM434210     | CAN60539     | putative protein            | <i>V. vinifera</i>    | 726                           | M                  | 101-416      | (221) |
| 147815114 | AM459464     | CAN65659     | putative protein            | <i>V. vinifera</i>    | 1742                          | M                  | 472-787      | (221) |
| 147818972 | AM434964     | CAN67116     | putative protein            | <i>V. vinifera</i>    | 1817                          | N                  | 53-384       | (221) |
| 147838326 | AM455602     | CAN61255     | putative protein            | <i>V. vinifera</i>    | 554                           | N                  | 80-416       | (221) |
| 147856290 | AM480980     | CAN79643     | putative protein            | <i>V. vinifera</i>    | 881                           | N                  | 7-366        | (221) |
| 147864402 | AM437988     | CAN80502     | putative protein            | <i>V. vinifera</i>    | 1082                          | M                  | 105-403      | (221) |
| 147866344 | AM488021     | CAN81981     | putative protein            | <i>V. vinifera</i>    | 1239                          | M                  | 283-566      | (221) |
| 147867330 | AM460760     | CAN81188     | putative protein            | <i>V. vinifera</i>    | 960                           | M                  | 108-403      | (221) |
| 119217    | 397908       | P28025       | Eg5 1                       | <i>X. laevis</i>      | 1060                          | N                  | 9-361        | (222) |
| 3023586   | 394322       | P79955       | Ctk 2                       | <i>X. laevis</i>      | 643                           | C                  | 292-636      | (223) |
| 3550684   | AJ009839     | CAA08879     | kinesin like protein 3      | <i>X. laevis</i>      | 744                           | N                  | 16-340       | (224) |
| 13235654  | AJ311602     | CAC33801     | kinesin-like protein        | <i>X. laevis</i>      | 699                           | N                  | 13-345       | (225) |
| 13959688  | 380006       | Q91636       | Kif 2C                      | <i>X. laevis</i>      | 730                           | M                  | 261-590      | (226) |
| 13959700  | 379622       | Q91637       | Kif 2A                      | <i>X. laevis</i>      | 682                           | M                  | 197-526      | (226) |
| 15209365  | AJ297516     | CAC14732     | kinesin-like protein        | <i>X. laevis</i>      | 1499                          | N                  | 2-385        | (227) |
| 18202613  | 394332       | Q91784       | Kif 4                       | <i>X. laevis</i>      | 1226                          | N                  | 7-338        | (228) |
| 82209779  | 373792       | Q7ZXX2       | Kif 19                      | <i>X. laevis</i>      | 997                           | N                  | 11-346       | (229) |
| 82217541  | 397909       | Q91785       | Kif 15A                     | <i>X. laevis</i>      | 1388                          | N                  | 25-364       | (230) |
| 82221703  |              | Q91869       | Kif 22A                     | <i>X. laevis</i>      | 651                           | N                  | 31-357       | (231) |
| 110468094 | DQ680042     | ABG74914     | kinesin heavy chain         | <i>X. laevis</i>      | 962                           | N                  | 6-325        | (232) |
| 123910885 | 443568       | Q498L9       | Kif 15B                     | <i>X. laevis</i>      | 1387                          | N                  | 25-364       | (230) |
| 147900710 | NM_001087485 | NP_001080954 | kinesin-related protein     | <i>X. laevis</i>      | 2954                          | N                  | 6-330        | (233) |
| 205815111 |              | Q7ZYL5       | Kif 22B                     | <i>X. laevis</i>      | 650                           | N                  | 31-357       | (234) |

| GI        | Gene ID      | NCBI Prot ID | Protein Name     | Taxa                 | No. aa in full length protein | Motor type (N/M/C) | Motor domain | Ref.  |
|-----------|--------------|--------------|------------------|----------------------|-------------------------------|--------------------|--------------|-------|
| 82202386  | 394855       | Q6P3R1       | Kif 22           | <i>X. tropicalis</i> | 639                           | N                  | 25-343       | (229) |
| 156717212 | NM_001016245 | NP_001016245 | putative protein | <i>X. tropicalis</i> | 947                           | N                  | 20-355       | (229) |
| 156717352 | NM_001102745 | NP_001096215 | putative protein | <i>X. tropicalis</i> | 1033                          | N                  | 9-329        | (229) |

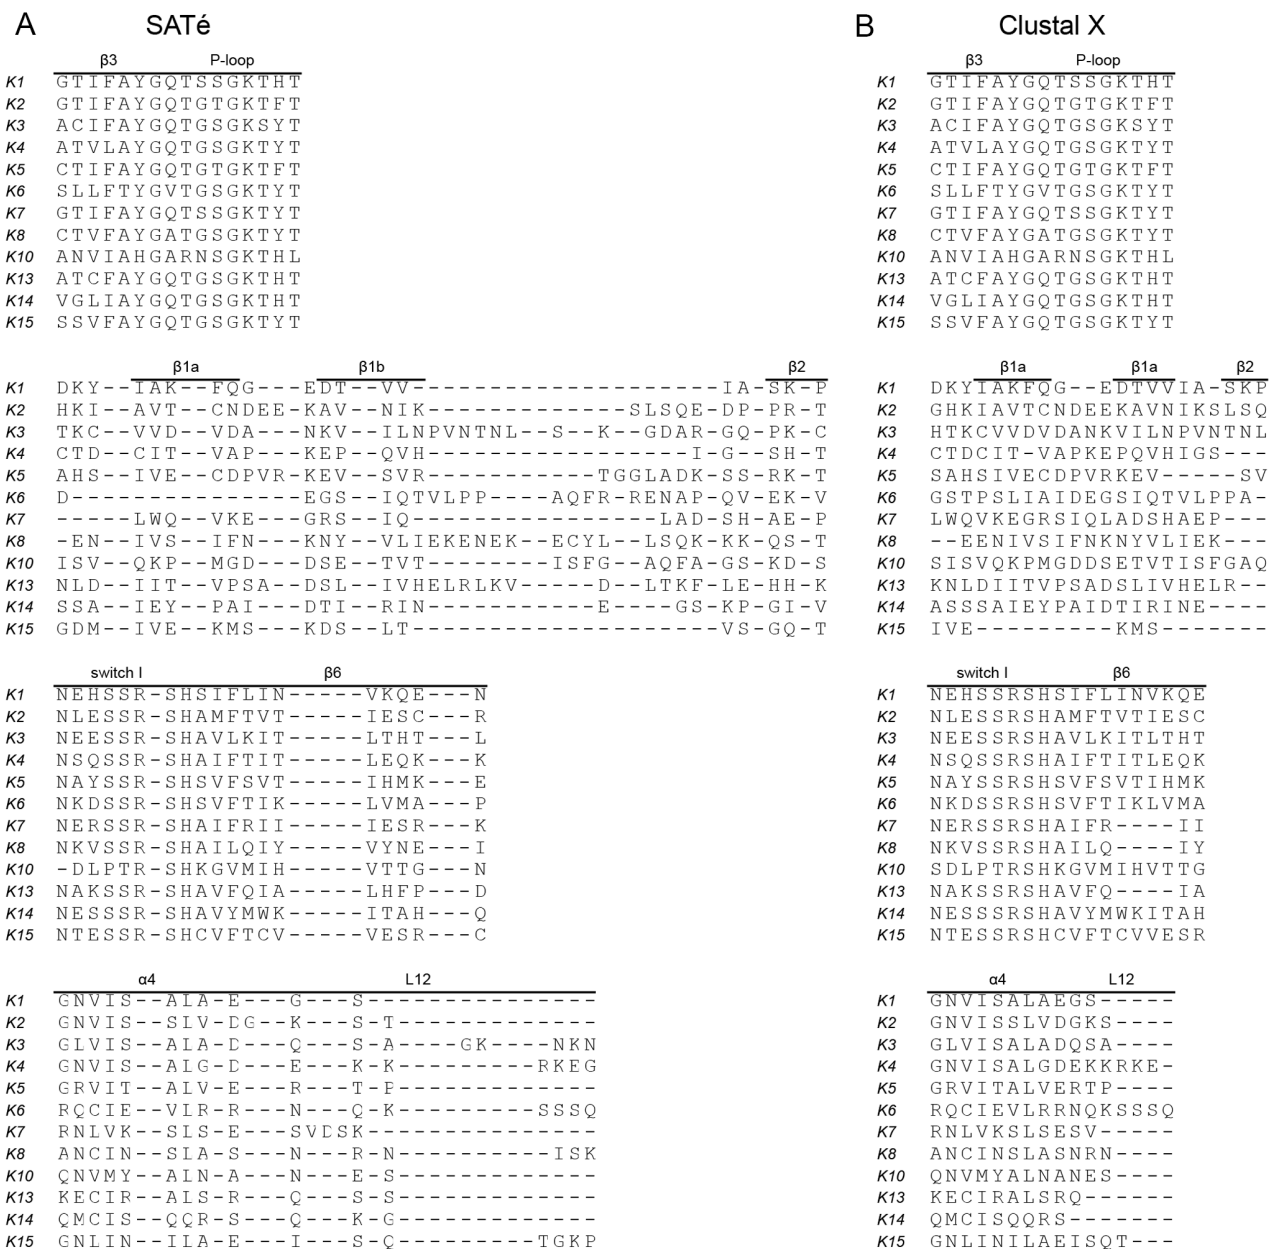

**Figure S1. SATé produces better resolution in sequence alignments over Clustal.** Portions of the full kinesin motor domain sequence alignment calculated with (A) SATé and (B) Clustal are shown as examples. A single sequence is a representative from each of the indicated kinesin families. Secondary structures are indicated at the top of each portion of the alignment. Gaps correspond to indels in the full sequence alignment.

A. energy transduction sector

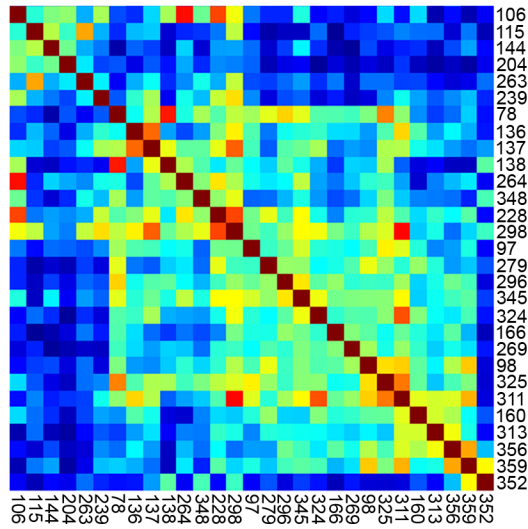

B. MT-binding sector

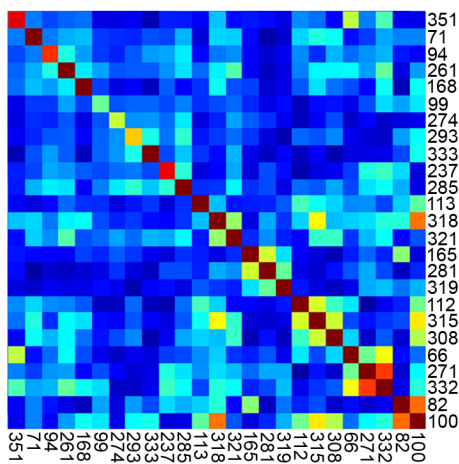

C. adenine-binding sector

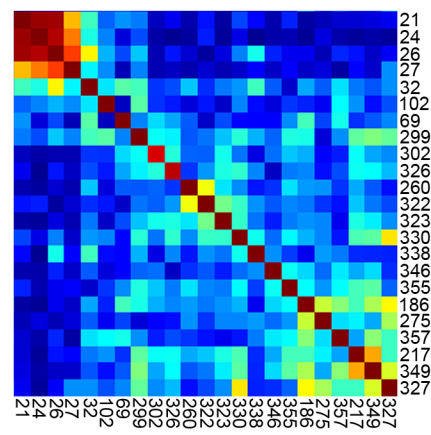

**Figure S2. Matrices for the energy transduction, MT-binding, and adenine-binding sectors.** An enlarged view of the matrix in Fig 2 that corresponds to the (A) energy transduction, (B), MT-binding, and (C) adenine-binding sectors is provided so that the individual residues comprising each sector can be identified. The residues listed are from human Kinesin-5 as in column 1 of Table 1.

## REFERENCES FOR SUPPLEMENTARY INFORMATION

1. Lockless, S. W., and Ranganathan, R. (1999) Evolutionarily conserved pathways of energetic connectivity in protein families. *Science* **286**, 295-299
2. Suel, G. M., Lockless, S. W., Wall, M. A., and Ranganathan, R. (2003) Evolutionarily conserved networks of residues mediate allosteric communication in proteins. *Nat Struct Biol* **10**, 59-69
3. Hatley, M. E., Lockless, S. W., Gibson, S. K., Gilman, A. G., and Ranganathan, R. (2003) Allosteric determinants in guanine nucleotide-binding proteins. *Proc Natl Acad Sci U.S.A.* **100**, 14445-14450
4. Shulman, A. I., Larson, C., Mangelsdorf, D. J., and Ranganathan, R. (2004) Structural determinants of allosteric ligand activation in RXR heterodimers. *Cell* **116**, 417-429
5. Halabi, N., Rivoire, O., Leibler, S., and Ranganathan, R. (2009) Protein sectors: evolutionary units of three-dimensional structure. *Cell* **138**, 774-786
6. Smock, R. G., Rivoire, O., Russ, W. P., Swain, J. F., Leibler, S., Ranganathan, R., and Gierasch, L. M. (2010) An interdomain sector mediating allostery in Hsp70 molecular chaperones. *Mol Syst Biol* **6**, 414
7. Reynolds, K. A., McLaughlin, R. N., and Ranganathan, R. (2011) Hot spots for allosteric regulation on protein surfaces. *Cell* **147**, 1564-1575
8. Wang, J., Zhao, Y., Wang, Y., and Huang, J. (2013) Molecular dynamics simulations and statistical coupling analysis reveal functional coevolution network of oncogenic mutations in the CDKN2A-CDK6 complex. *FEBS Lett* **587**, 136-141
9. Russ, W. P., Lowery, D. M., Mishra, P., Yaffe, M. B., and Ranganathan, R. (2005) Natural-like function in artificial WW domains. *Nature* **437**, 579-583
10. Socolich, M., Lockless, S. W., Russ, W. P., Lee, H., Gardner, K. H., and Ranganathan, R. (2005) Evolutionary information for specifying a protein fold. *Nature* **437**, 512-518
11. Singh, S., Mandlik, V., and Shinde, S. (2015) Molecular dynamics simulations and statistical coupling analysis of GPII2 in *L. major*: functional co-evolution and conservedness reveals potential drug-target sites. *Mol Biosyst* **11**, 958-968
12. Zhao, Y., Wang, Y., Gao, Y., Li, G., and Huang, J. (2015) Integrated analysis of residue coevolution and protein structures capture key protein sectors in HIV-1 proteins. *PLoS One* **10**, e0117506
13. Tamaki, F. K., Textor, L. C., Polikarpov, I., and Marana, S. R. (2014) Sets of covariant residues modulate the activity and thermal stability of GH1 beta-glucosidases. *PLoS One* **9**, e96627
14. Lee, S. Y., Banerjee, A., and MacKinnon, R. (2009) Two separate interfaces between the voltage sensor and pore are required for the function of voltage-dependent K(+) channels. *PLoS Biol* **7**, e47
15. Grant, B. J., McCammon, J. A., Caves, L. S., and Cross, R. A. (2007) Multivariate analysis of conserved sequence-structure relationships in kinesins: coupling of the active site and a tubulin-binding sub-domain. *J Mol Biol* **368**, 1231-1248
16. Yu, H., Ma, L., Yang, Y., and Cui, Q. (2007) Mechanochemical coupling in the myosin motor domain. II. Analysis of critical residues. *PLoS Computat Biol* **3**, e23
17. Johnson, J. M., Sanford, B. L., Strom, A. M., Tadayon, S. N., Lehman, B. P., Zirbes, A. M., Bhattacharyya, S., Musier-Forsyth, K., and Hati, S. (2013) Multiple pathways promote dynamical coupling between catalytic domains in *Escherichia coli* prolyl-tRNA synthetase. *Biochemistry* **52**, 4399-4412
18. Pless, S. A., Niciforovic, A. P., Galpin, J. D., Nunez, J. J., Kurata, H. T., and Ahern, C. A. (2013) A novel mechanism for fine-tuning open-state stability in a voltage-gated potassium channel. *Nat Commun* **4**, 1784
19. Baths, V., and Roy, U. (2011) Identification of distant co-evolving residues in antigen 85C from *Mycobacterium tuberculosis* using statistical coupling analysis of the esterase family proteins. *J Biomed Res* **25**, 165-169

20. Campanello, G. C., Ma, Z., Grosseohme, N. E., Guerra, A. J., Ward, B. P., Dimarchi, R. D., Ye, Y., Dann, C. E., 3rd, and Giedroc, D. P. (2013) Allosteric inhibition of a zinc-sensing transcriptional repressor: insights into the arsenic repressor (ArsR) family. *J Mol Biol* **425**, 1143-1157
21. Mendoza, J. L., Schmidt, A., Li, Q., Nuvaga, E., Barrett, T., Bridges, R. J., Feranchak, A. P., Brautigam, C. A., and Thomas, P. J. (2012) Requirements for efficient correction of DeltaF508 CFTR revealed by analyses of evolved sequences. *Cell* **148**, 164-174
22. Strafford, J., Payongsri, P., Hibbert, E. G., Morris, P., Bath, S. S., Steadman, D., Smith, M. E., Ward, J. M., Hailes, H. C., and Dalby, P. A. (2012) Directed evolution to re-adapt a co-evolved network within an enzyme. *J Biotechnol* **157**, 237-245
23. Chen, Z., Rappert, S., Sun, J., and Zeng, A. P. (2011) Integrating molecular dynamics and co-evolutionary analysis for reliable target prediction and deregulation of the allosteric inhibition of aspartokinase for amino acid production. *J Biotechnol* **154**, 248-254
24. Martin-Galiano, A. J., Buey, R. M., Cabezas, M., and Andreu, J. M. (2010) Mapping flexibility and the assembly switch of cell division protein FtsZ by computational and mutational approaches. *J Biol Chem* **285**, 22554-22565
25. Hsu, Y. H., and Traugh, J. A. (2010) Reciprocally coupled residues crucial for protein kinase Pak2 activity calculated by statistical coupling analysis. *PLoS One* **5**, e9455
26. Xu, F., Du, P., Shen, H., Hu, H., Wu, Q., Xie, J., and Yu, L. (2009) Correlated mutation analysis on the catalytic domains of serine/threonine protein kinases. *PLoS One* **4**, e5913
27. Weimer, K. M., Shane, B. L., Brunetto, M., Bhattacharyya, S., and Hati, S. (2009) Evolutionary basis for the coupled-domain motions in *Thermus thermophilus* leucyl-tRNA synthetase. *J Biol Chem* **284**, 10088-10099
28. Nascimento, A. S., Krauchenco, S., Golubev, A. M., Gustchina, A., Wlodawer, A., and Polikarpov, I. (2008) Statistical coupling analysis of aspartic proteinases based on crystal structures of the *Trichoderma reesei* enzyme and its complex with pepstatin A. *J Mol Biol* **382**, 763-778
29. Ozkan, E., Yu, H., and Deisenhofer, J. (2005) Mechanistic insight into the allosteric activation of a ubiquitin-conjugating enzyme by RING-type ubiquitin ligases. *Proc Natl Acad Sci U.S.A.* **102**, 18890-18895
30. Estabrook, R. A., Luo, J., Purdy, M. M., Sharma, V., Weakliem, P., Bruice, T. C., and Reich, N. O. (2005) Statistical coevolution analysis and molecular dynamics: Identification of amino acid pairs essential for catalysis. *Proc Natl Acad Sci U.S.A.* **102**, 994-999
31. Lee, J., Natarajan, M., Nashine, V. C., Socolich, M., Vo, T., Russ, W. P., Benkovic, S. J., and Ranganathan, R. (2008) Surface sites for engineering allosteric control in proteins. *Science* **322**, 438-442
32. Nichols, S. E., Hernandez, C. X., Wang, Y., and McCammon, J. A. (2013) Structure-based network analysis of an evolved G protein-coupled receptor homodimer interface. *Protein Sci* **22**, 745-754
33. Watanabe, L., de Moura, P. R., Bleicher, L., Nascimento, A. S., Zamorano, L. S., Calvete, J. J., Sanz, L., Perez, A., Bursakov, S., Roig, M. G., Shnyrov, V. L., and Polikarpov, I. (2010) Crystal structure and statistical coupling analysis of highly glycosylated peroxidase from royal palm tree (*Roystonea regia*). *J Struct Biol* **169**, 226-242
34. Tehver, R., Chen, J., and Thirumalai, D. (2009) Allostery wiring diagrams in the transitions that drive the GroEL reaction cycle. *J Mol Biol* **387**, 390-406
35. Fuchs, A., Martin-Galiano, A. J., Kalman, M., Fleishman, S., Ben-Tal, N., and Frishman, D. (2007) Co-evolving residues in membrane proteins. *Bioinformatics* **23**, 3312-3319
36. Nene, V., Wortman, J. R., Lawson, D., Haas, B., Kodira, C., Tu, Z. J., Loftus, B., Xi, Z., Megy, K., Grabherr, M., Ren, Q., Zdobnov, E. M., Lobo, N. F., Campbell, K. S., Brown, S. E., Bonaldo, M. F., Zhu, J., Sinkins, S. P., Hogenkamp, D. G., Amedeo, P., Arensburger, P., Atkinson, P. W., Bidwell, S., Biedler, J., Birney, E., Bruggner, R. V., Costas, J., Coy, M. R., Crabtree, J.,

- Crawford, M., Debruyne, B., Decaprio, D., Eiglmeier, K., Eisenstadt, E., El-Dorry, H., Gelbart, W. M., Gomes, S. L., Hammond, M., Hannick, L. I., Hogan, J. R., Holmes, M. H., Jaffe, D., Johnston, J. S., Kennedy, R. C., Koo, H., Kravitz, S., Kriventseva, E. V., Kulp, D., Labutti, K., Lee, E., Li, S., Lovin, D. D., Mao, C., Mauceli, E., Menck, C. F., Miller, J. R., Montgomery, P., Mori, A., Nascimento, A. L., Naveira, H. F., Nusbaum, C., O'Leary, S., Orvis, J., Perete, M., Quesneville, H., Reidenbach, K. R., Rogers, Y. H., Roth, C. W., Schneider, J. R., Schatz, M., Shumway, M., Stanke, M., Stinson, E. O., Tubio, J. M., Vanze, J. P., Verjovski-Almeida, S., Werner, D., White, O., Wyder, S., Zeng, Q., Zhao, Q., Zhao, Y., Hill, C. A., Raikhel, A. S., Soares, M. B., Knudson, D. L., Lee, N. H., Galagan, J., Salzberg, S. L., Paulsen, I. T., Dimopoulos, G., Collins, F. H., Birren, B., Fraser-Liggett, C. M., and Severson, D. W. (2007) Genome sequence of *Aedes aegypti*, a major arbovirus vector. *Science* **316**, 1718-1723
37. Sharpton, T. J., Stajich, J. E., Rounsley, S. D., Gardner, M. J., Wortman, J. R., Jordan, V. S., Maiti, R., Kodira, C. D., Neafsey, D. E., Zeng, Q., Hung, C. Y., McMahan, C., Muszewska, A., Grynberg, M., Mandel, M. A., Kellner, E. M., Barker, B. M., Galgiani, J. N., Orbach, M. J., Kirkland, T. N., Cole, G. T., Henn, M. R., Birren, B. W., and Taylor, J. W. (2009) Comparative genomic analyses of the human fungal pathogens *Coccidioides* and their relatives. *Genome Res* **19**, 1722-1731
38. Sharakhova, M. V., Hammond, M. P., Lobo, N. F., Krzywinski, J., Unger, M. F., Hillenmeyer, M. E., Bruggner, R. V., Birney, E., and Collins, F. H. (2007) Update of the *Anopheles gambiae* PEST genome assembly. *Genome Biol* **8**, R5
39. Holt, R. A., Subramanian, G. M., Halpern, A., Sutton, G. G., Charlab, R., Nusskern, D. R., Wincker, P., Clark, A. G., Ribeiro, J. M., Wides, R., Salzberg, S. L., Loftus, B., Yandell, M., Majoros, W. H., Rusch, D. B., Lai, Z., Kraft, C. L., Abril, J. F., Anthouard, V., Arensburger, P., Atkinson, P. W., Baden, H., de Berardinis, V., Baldwin, D., Benes, V., Biedler, J., Blass, C., Bolanos, R., Boscus, D., Barnstead, M., Cai, S., Center, A., Chaturverdi, K., Christophides, G. K., Chrystal, M. A., Clamp, M., Cravchik, A., Curwen, V., Dana, A., Delcher, A., Dew, I., Evans, C. A., Flanagan, M., Grundschober-Freimoser, A., Friedli, L., Gu, Z., Guan, P., Guigo, R., Hillenmeyer, M. E., Hladun, S. L., Hogan, J. R., Hong, Y. S., Hoover, J., Jaillon, O., Ke, Z., Kodira, C., Kokoza, E., Koutsos, A., Letunic, I., Levitsky, A., Liang, Y., Lin, J. J., Lobo, N. F., Lopez, J. R., Malek, J. A., McIntosh, T. C., Meister, S., Miller, J., Mobarry, C., Mongin, E., Murphy, S. D., O'Brochta, D. A., Pfankoch, C., Qi, R., Regier, M. A., Remington, K., Shao, H., Sharakhova, M. V., Sitter, C. D., Shetty, J., Smith, T. J., Strong, R., Sun, J., Thomasova, D., Ton, L. Q., Topalis, P., Tu, Z., Unger, M. F., Walenz, B., Wang, A., Wang, J., Wang, M., Wang, X., Woodford, K. J., Wortman, J. R., Wu, M., Yao, A., Zdobnov, E. M., Zhang, H., Zhao, Q., Zhao, S., Zhu, S. C., Zhimulev, I., Coluzzi, M., della Torre, A., Roth, C. W., Louis, C., Kalush, F., Mural, R. J., Myers, E. W., Adams, M. D., Smith, H. O., Broder, S., Gardner, M. J., Fraser, C. M., Birney, E., Bork, P., Brey, P. T., Venter, J. C., Weissenbach, J., Kafatos, F. C., Collins, F. H., and Hoffman, S. L. (2002) The genome sequence of the malaria mosquito *Anopheles gambiae*. *Science* **298**, 129-149
40. Puthanveetil, S. V., Monje, F. J., Miniaci, M. C., Choi, Y. B., Karl, K. A., Khandros, E., Gawinowicz, M. A., Sheetz, M. P., and Kandel, E. R. (2008) A new component in synaptic plasticity: upregulation of kinesin in the neurons of the gill-withdrawal reflex. *Cell* **135**, 960-973
41. Mitsui, H., Yamaguchi-Shinozaki, K., Shinozaki, K., Nishikawa, K., and Takahashi, H. (1993) Identification of a gene family (*kat*) encoding kinesin-like proteins in *Arabidopsis thaliana* and the characterization of secondary structure of *KatA*. *Mol Gen Genet* **238**, 362-368
42. Mitsui, H., Nakatani, K., Yamaguchi-Shinozaki, K., Shinozaki, K., Nishikawa, K., and Takahashi, H. (1994) Sequencing and characterization of the kinesin-related genes *katB* and *katC* of *Arabidopsis thaliana*. *Plant Mol Biol* **25**, 865-876
43. Yamada, K., Lim, J., Dale, J. M., Chen, H., Shinn, P., Palm, C. J., Southwick, A. M., Wu, H. C., Kim, C., Nguyen, M., Pham, P., Cheuk, R., Karlin-Newmann, G., Liu, S. X., Lam, B., Sakano, H., Wu, T., Yu, G., Miranda, M., Quach, H. L., Tripp, M., Chang, C. H., Lee, J. M., Toriumi, M.,



- Chan, M. M., Tang, C. C., Onodera, C. S., Deng, J. M., Akiyama, K., Ansari, Y., Arakawa, T., Banh, J., Banno, F., Bowser, L., Brooks, S., Carninci, P., Chao, Q., Choy, N., Enju, A., Goldsmith, A. D., Gurjal, M., Hansen, N. F., Hayashizaki, Y., Johnson-Hopson, C., Hsuan, V. W., Iida, K., Karnes, M., Khan, S., Koesema, E., Ishida, J., Jiang, P. X., Jones, T., Kawai, J., Kamiya, A., Meyers, C., Nakajima, M., Narusaka, M., Seki, M., Sakurai, T., Satou, M., Tamse, R., Vaysberg, M., Wallender, E. K., Wong, C., Yamamura, Y., Yuan, S., Shinozaki, K., Davis, R. W., Theologis, A., and Ecker, J. R. (2003) Empirical analysis of transcriptional activity in the *Arabidopsis* genome. *Science* **302**, 842-846
44. Lin, X., Kaul, S., Rounsley, S., Shea, T. P., Benito, M. I., Town, C. D., Fujii, C. Y., Mason, T., Bowman, C. L., Barnstead, M., Feldblyum, T. V., Buell, C. R., Ketchum, K. A., Lee, J., Ronning, C. M., Koo, H. L., Moffat, K. S., Cronin, L. A., Shen, M., Pai, G., Van Aken, S., Umayam, L., Tallon, L. J., Gill, J. E., Adams, M. D., Carrera, A. J., Creasy, T. H., Goodman, H. M., Somerville, C. R., Copenhaver, G. P., Preuss, D., Nierman, W. C., White, O., Eisen, J. A., Salzberg, S. L., Fraser, C. M., and Venter, J. C. (1999) Sequence and analysis of chromosome 2 of the plant *Arabidopsis thaliana*. *Nature* **402**, 761-768
45. Mayer, K., Schuller, C., Wambutt, R., Murphy, G., Volckaert, G., Pohl, T., Dusterhoft, A., Stiekema, W., Entian, K. D., Terry, N., Harris, B., Ansorge, W., Brandt, P., Grivell, L., Rieger, M., Weichselgartner, M., de Simone, V., Obermaier, B., Mache, R., Muller, M., Kreis, M., Delseny, M., Puigdomenech, P., Watson, M., Schmidtheini, T., Reichert, B., Portatelle, D., Perez-Alonso, M., Boutry, M., Bancroft, I., Vos, P., Hoheisel, J., Zimmermann, W., Wedler, H., Ridley, P., Langham, S. A., McCullagh, B., Bilham, L., Robben, J., Van der Schueren, J., Grymonprez, B., Chuang, Y. J., Vandenbussche, F., Braeken, M., Weltjens, I., Voet, M., Bastiaens, I., Aert, R., Defoor, E., Weitzenegger, T., Bothe, G., Ramsperger, U., Hilbert, H., Braun, M., Holzer, E., Brandt, A., Peters, S., van Staveren, M., Dirske, W., Mooijman, P., Klein Lankhorst, R., Rose, M., Hauf, J., Kotter, P., Berneiser, S., Hempel, S., Feldpausch, M., Lamberth, S., Van den Daele, H., De Keyser, A., Buysschaert, C., Gielen, J., Villarroel, R., De Clercq, R., Van Montagu, M., Rogers, J., Cronin, A., Quail, M., Bray-Allen, S., Clark, L., Doggett, J., Hall, S., Kay, M., Lennard, N., McLay, K., Mayes, R., Pettett, A., Rajandream, M. A., Lyne, M., Benes, V., Rechmann, S., Borkova, D., Blocker, H., Scharfe, M., Grimm, M., Lohnert, T. H., Dose, S., de Haan, M., Maarse, A., Schafer, M., Muller-Auer, S., Gabel, C., Fuchs, M., Fartmann, B., Granderath, K., Dauner, D., Herzl, A., Neumann, S., Argiriou, A., Vitale, D., Liguori, R., Piravandi, E., Massenet, O., Quigley, F., Clabaud, G., Mundlein, A., Felber, R., Schnabl, S., Hiller, R., Schmidt, W., Lecharny, A., Aubourg, S., Chefdor, F., Cooke, R., Berger, C., Montfort, A., Casacuberta, E., Gibbons, T., Weber, N., Vandenbol, M., Bargues, M., Terol, J., Torres, A., Perez-Perez, A., Purnelle, B., Bent, E., Johnson, S., Tacon, D., Jesse, T., Heijnen, L., Schwarz, S., Scholler, P., Heber, S., Francs, P., Bielke, C., Frishman, D., Haase, D., Lemcke, K., Mewes, H. W., Stocker, S., Zaccaria, P., Bevan, M., Wilson, R. K., de la Bastide, M., Habermann, K., Parnell, L., Dedhia, N., Gnoj, L., Schutz, K., Huang, E., Spiegel, L., Sehkou, M., Murray, J., Sheet, P., Cordes, M., Abu-Threideh, J., Stoneking, T., Kalicki, J., Graves, T., Harmon, G., Edwards, J., Latreille, P., Courtney, L., Cloud, J., Abbott, A., Scott, K., Johnson, D., Minx, P., Bentley, D., Fulton, B., Miller, N., Greco, T., Kemp, K., Kramer, J., Fulton, L., Mardis, E., Dante, M., Pepin, K., Hillier, L., Nelson, J., Spieth, J., Ryan, E., Andrews, S., Geisel, C., Layman, D., Du, H., Ali, J., Berghoff, A., Jones, K., Drone, K., Cotton, M., Joshu, C., Antonoiu, B., Zidanic, M., Strong, C., Sun, H., Lamar, B., Yordan, C., Ma, P., Zhong, J., Preston, R., Vil, D., Shekher, M., Matero, A., Shah, R., Swaby, I. K., O'Shaughnessy, A., Rodriguez, M., Hoffmann, J., Till, S., Granat, S., Shohdy, N., Hasegawa, A., Hameed, A., Lodhi, M., Johnson, A., Chen, E., Marra, M., Martienssen, R., and McCombie, W. R. (1999) Sequence and analysis of chromosome 4 of the plant *Arabidopsis thaliana*. *Nature* **402**, 769-777
46. Salanoubat, M., Lemcke, K., Rieger, M., Ansorge, W., Unseld, M., Fartmann, B., Valle, G., Blocker, H., Perez-Alonso, M., Obermaier, B., Delseny, M., Boutry, M., Grivell, L. A., Mache, R., Puigdomenech, P., De Simone, V., Choisine, N., Artiguenave, F., Robert, C., Brottier, P.,

- Wincker, P., Cattolico, L., Weissenbach, J., Saurin, W., Quetier, F., Schafer, M., Muller-Auer, S., Gabel, C., Fuchs, M., Benes, V., Wurmbach, E., Drzonek, H., Erfle, H., Jordan, N., Bangert, S., Wiedelmann, R., Kranz, H., Voss, H., Holland, R., Brandt, P., Nyakatura, G., Vezzi, A., D'Angelo, M., Pallavicini, A., Toppo, S., Simionati, B., Conrad, A., Hornischer, K., Kauer, G., Lohnert, T. H., Nordsiek, G., Reichelt, J., Scharfe, M., Schon, O., Bargues, M., Terol, J., Climent, J., Navarro, P., Collado, C., Perez-Perez, A., Ottenwalder, B., Duchemin, D., Cooke, R., Laudie, M., Berger-Llauro, C., Purnelle, B., Masuy, D., de Haan, M., Maarse, A. C., Alcaraz, J. P., Cottet, A., Casacuberta, E., Monfort, A., Argiriou, A., flores, M., Liguori, R., Vitale, D., Mannhaupt, G., Haase, D., Schoof, H., Rudd, S., Zaccaria, P., Mewes, H. W., Mayer, K. F., Kaul, S., Town, C. D., Koo, H. L., Tallon, L. J., Jenkins, J., Rooney, T., Rizzo, M., Walts, A., Utterback, T., Fujii, C. Y., Shea, T. P., Creasy, T. H., Haas, B., Maiti, R., Wu, D., Peterson, J., Van Aken, S., Pai, G., Militscher, J., Sellers, P., Gill, J. E., Feldblyum, T. V., Preuss, D., Lin, X., Nierman, W. C., Salzberg, S. L., White, O., Venter, J. C., Fraser, C. M., Kaneko, T., Nakamura, Y., Sato, S., Kato, T., Asamizu, E., Sasamoto, S., Kimura, T., Idesawa, K., Kawashima, K., Kishida, Y., Kiyokawa, C., Kohara, M., Matsumoto, M., Matsuno, A., Muraki, A., Nakayama, S., Nakazaki, N., Shinpo, S., Takeuchi, C., Wada, T., Watanabe, A., Yamada, M., Yasuda, M., Tabata, S., European Union Chromosome 3 Arabidopsis Sequencing Consortium, Institute for Genomic Research, and Kazusa DNA Research Institute (2000) Sequence and analysis of chromosome 3 of the plant *Arabidopsis thaliana*. *Nature* **408**, 820-822
47. Kato, A., Suzuki, M., Kuwahara, A., Ooe, H., Higano-Inaba, K., and Komeda, Y. (1999) Isolation and analysis of cDNA within a 300 kb *Arabidopsis thaliana* genomic region located around the 100 map unit of chromosome 1. *Gene* **239**, 309-316
48. Theologis, A., Ecker, J. R., Palm, C. J., Federspiel, N. A., Kaul, S., White, O., Alonso, J., Altafi, H., Araujo, R., Bowman, C. L., Brooks, S. Y., Buehler, E., Chan, A., Chao, Q., Chen, H., Cheuk, R. F., Chin, C. W., Chung, M. K., Conn, L., Conway, A. B., Conway, A. R., Creasy, T. H., Dewar, K., Dunn, P., Egtu, P., Feldblyum, T. V., Feng, J., Fong, B., Fujii, C. Y., Gill, J. E., Goldsmith, A. D., Haas, B., Hansen, N. F., Hughes, B., Huizar, L., Hunter, J. L., Jenkins, J., Johnson-Hopson, C., Khan, S., Khaykin, E., Kim, C. J., Koo, H. L., Kremenetskaia, I., Kurtz, D. B., Kwan, A., Lam, B., Langin-Hooper, S., Lee, A., Lee, J. M., Lenz, C. A., Li, J. H., Li, Y., Lin, X., Liu, S. X., Liu, Z. A., Luros, J. S., Maiti, R., Marziali, A., Militscher, J., Miranda, M., Nguyen, M., Nierman, W. C., Osborne, B. I., Pai, G., Peterson, J., Pham, P. K., Rizzo, M., Rooney, T., Rowley, D., Sakano, H., Salzberg, S. L., Schwartz, J. R., Shinn, P., Southwick, A. M., Sun, H., Tallon, L. J., Tambunga, G., Toriumi, M. J., Town, C. D., Utterback, T., Van Aken, S., Vaysberg, M., Vysotskaia, V. S., Walker, M., Wu, D., Yu, G., Fraser, C. M., Venter, J. C., and Davis, R. W. (2000) Sequence and analysis of chromosome 1 of the plant *Arabidopsis thaliana*. *Nature* **408**, 816-820
49. Tabata, S., Kaneko, T., Nakamura, Y., Kotani, H., Kato, T., Asamizu, E., Miyajima, N., Sasamoto, S., Kimura, T., Hosouchi, T., Kawashima, K., Kohara, M., Matsumoto, M., Matsuno, A., Muraki, A., Nakayama, S., Nakazaki, N., Naruo, K., Okumura, S., Shinpo, S., Takeuchi, C., Wada, T., Watanabe, A., Yamada, M., Yasuda, M., Sato, S., de la Bastide, M., Huang, E., Spiegel, L., Gnoj, L., O'Shaughnessy, A., Preston, R., Habermann, K., Murray, J., Johnson, D., Rohlffing, T., Nelson, J., Stoneking, T., Pepin, K., Spieth, J., Sekhon, M., Armstrong, J., Becker, M., Belter, E., Cordum, H., Cordes, M., Courtney, L., Courtney, W., Dante, M., Du, H., Edwards, J., Fryman, J., Haakensen, B., Lamar, E., Latreille, P., Leonard, S., Meyer, R., Mulvaney, E., Ozersky, P., Riley, A., Strowmatt, C., Wagner-McPherson, C., Wollam, A., Yoakum, M., Bell, M., Dedhia, N., Parnell, L., Shah, R., Rodriguez, M., See, L. H., Vil, D., Baker, J., Kirchoff, K., Toth, K., King, L., Bahret, A., Miller, B., Marra, M., Martienssen, R., McCombie, W. R., Wilson, R. K., Murphy, G., Bancroft, I., Volckaert, G., Wambutt, R., Dusterhoft, A., Stiekema, W., Pohl, T., Entian, K. D., Terry, N., Hartley, N., Bent, E., Johnson, S., Langham, S. A., McCullagh, B., Robben, J., Grymonprez, B., Zimmermann, W., Ramsperger, U., Wedler, H., Balke, K., Wedler, E., Peters, S., van Staveren, M., Dirkse, W., Mooijman, P., Lankhorst, R. K., Weitzenegger, T.,

- Bothe, G., Rose, M., Hauf, J., Berneiser, S., Hempel, S., Feldpausch, M., Lamberth, S., Villarroel, R., Gielen, J., Ardiles, W., Bents, O., Lemcke, K., Kolesov, G., Mayer, K., Rudd, S., Schoof, H., Schueller, C., Zaccaria, P., Mewes, H. W., Bevan, M., Fransz, P., Kazusa DNA Research Institute, The Cold Spring Harbor and Washington University in St. Louis Sequencing Consortium, and The European Union Arabidopsis Genome Sequencing Consortium. (2000) Sequence and analysis of chromosome 5 of the plant *Arabidopsis thaliana*. *Nature* **408**, 823-826
50. Lee, Y. R., and Liu, B. (2000) Identification of a phragmoplast-associated kinesin-related protein in higher plants. *Curr Biol* **10**, 797-800
51. Sakai, T., Honing, H., Nishioka, M., Uehara, Y., Takahashi, M., Fujisawa, N., Saji, K., Seki, M., Shinozaki, K., Jones, M. A., Smirnov, N., Okada, K., and Wasteneys, G. O. (2008) Armadillo repeat-containing kinesins and a NIMA-related kinase are required for epidermal-cell morphogenesis in *Arabidopsis*. *Plant J* **53**, 157-171
52. Kong, L. J., and Hanley-Bowdoin, L. (2002) A geminivirus replication protein interacts with a protein kinase and a motor protein that display different expression patterns during plant development and infection. *Plant Cell* **14**, 1817-1832
53. Iida, K., Fukami-Kobayashi, K., Toyoda, A., Sakaki, Y., Kobayashi, M., Seki, M., and Shinozaki, K. (2009) Analysis of multiple occurrences of alternative splicing events in *Arabidopsis thaliana* using novel sequenced full-length cDNAs. *DNA Res* **16**, 155-164
54. Dietrich, F. S., Voegeli, S., Brachat, S., Lerch, A., Gates, K., Steiner, S., Mohr, C., Pohlmann, R., Luedi, P., Choi, S., Wing, R. A., Flavier, A., Gaffney, T. D., and Philippsen, P. (2004) The *Ashbya gossypii* genome as a tool for mapping the ancient *Saccharomyces cerevisiae* genome. *Science* **304**, 304-307
55. Fedorova, N. D., Khaldi, N., Joardar, V. S., Maiti, R., Amedeo, P., Anderson, M. J., Crabtree, J., Silva, J. C., Badger, J. H., Albarraq, A., Angiuoli, S., Bussey, H., Bowyer, P., Cotty, P. J., Dyer, P. S., Egan, A., Galens, K., Fraser-Liggett, C. M., Haas, B. J., Inman, J. M., Kent, R., Lemieux, S., Malavazi, I., Orvis, J., Roemer, T., Ronning, C. M., Sundaram, J. P., Sutton, G., Turner, G., Venter, J. C., White, O. R., Whitty, B. R., Youngman, P., Wolfe, K. H., Goldman, G. H., Wortman, J. R., Jiang, B., Denning, D. W., and Nierman, W. C. (2008) Genomic islands in the pathogenic filamentous fungus *Aspergillus fumigatus*. *PLoS Genet* **4**, e1000046
56. Nierman, W. C., Pain, A., Anderson, M. J., Wortman, J. R., Kim, H. S., Arroyo, J., Berriman, M., Abe, K., Archer, D. B., Bermejo, C., Bennett, J., Bowyer, P., Chen, D., Collins, M., Coulsen, R., Davies, R., Dyer, P. S., Farman, M., Fedorova, N., Feldblyum, T. V., Fischer, R., Fosker, N., Fraser, A., Garcia, J. L., Garcia, M. J., Goble, A., Goldman, G. H., Gomi, K., Griffith-Jones, S., Gwilliam, R., Haas, B., Haas, H., Harris, D., Horiuchi, H., Huang, J., Humphray, S., Jimenez, J., Keller, N., Khouri, H., Kitamoto, K., Kobayashi, T., Konzack, S., Kulkarni, R., Kumagai, T., Lafon, A., Latge, J. P., Li, W., Lord, A., Lu, C., Majoros, W. H., May, G. S., Miller, B. L., Mohamoud, Y., Molina, M., Monod, M., Mouyna, I., Mulligan, S., Murphy, L., O'Neil, S., Paulsen, I., Penalva, M. A., Perlea, M., Price, C., Pritchard, B. L., Quail, M. A., Rabinowitsch, E., Rawlins, N., Rajandream, M. A., Reichard, U., Renauld, H., Robson, G. D., Rodriguez de Cordoba, S., Rodriguez-Pena, J. M., Ronning, C. M., Rutter, S., Salzberg, S. L., Sanchez, M., Sanchez-Ferrero, J. C., Saunders, D., Seeger, K., Squares, R., Squares, S., Takeuchi, M., Tekaia, F., Turner, G., Vazquez de Aldana, C. R., Weidman, J., White, O., Woodward, J., Yu, J. H., Fraser, C., Galagan, J. E., Asai, K., Machida, M., Hall, N., Barrell, B., and Denning, D. W. (2005) Genomic sequence of the pathogenic and allergenic filamentous fungus *Aspergillus fumigatus*. *Nature* **438**, 1151-1156
57. Pel, H. J., de Winde, J. H., Archer, D. B., Dyer, P. S., Hofmann, G., Schaap, P. J., Turner, G., de Vries, R. P., Albang, R., Albermann, K., Andersen, M. R., Bendtsen, J. D., Benen, J. A., van den Berg, M., Breestraat, S., Caddick, M. X., Contreras, R., Cornell, M., Coutinho, P. M., Danchin, E. G., Debets, A. J., Dekker, P., van Dijk, P. W., van Dijk, A., Dijkhuizen, L., Driessen, A. J., d'Enfert, C., Geysens, S., Goosen, C., Groot, G. S., de Groot, P. W., Guillemette, T., Henrissat, B., Herweijer, M., van den Hombergh, J. P., van den Hondel, C. A., van der Heijden, R. T., van

- der Kaaij, R. M., Klis, F. M., Kools, H. J., Kubicek, C. P., van Kuyk, P. A., Lauber, J., Lu, X., van der Maarel, M. J., Meulenberg, R., Menke, H., Mortimer, M. A., Nielsen, J., Oliver, S. G., Olsthoorn, M., Pal, K., van Peij, N. N., Ram, A. F., Rinas, U., Roubos, J. A., Sagt, C. M., Schmoll, M., Sun, J., Ussery, D., Varga, J., Vervecken, W., van de Vondervoort, P. J., Wedler, H., Wosten, H. A., Zeng, A. P., van Ooyen, A. J., Visser, J., and Stam, H. (2007) Genome sequencing and analysis of the versatile cell factory *Aspergillus niger* CBS 513.88. *Nat Biotechnol* **25**, 221-231
58. Birren, B., Lander, E., Galagan, J., Nusbaum, C., Devon, K., Henn, M., Ma, L. J., Jaffe, D., Butler, J., Alvarez, P., Gnerre, S., Grabherr, M., Kleber, M., Mauceli, E., Brockman, W., Rounsley, S., Young, S., LaButti, K., Pushparaj, V., DeCaprio, D., Crawford, M., Koehrsen, M., Engels, R., Montgomery, P., Pearson, M., Howarth, C., Larson, L., Luoma, S., White, J., Alvarado, L., Kodira, C., Zeng, Q., O'Leary, S., Yandava, C., Denning, D., Nierman, B., Milne, T., and Madden, K. (2005) Annotation of the *Aspergillus terreus* NIH2624 genome. Broad Institute of MIT and Harvard, Cambridge. Direct submission to EMBL/GenBank/DBJ databases
59. Brayton, K. A., Lau, A. O., Herndon, D. R., Hannick, L., Kappmeyer, L. S., Berens, S. J., Bidwell, S. L., Brown, W. C., Crabtree, J., Fadrosch, D., Feldblum, T., Forberger, H. A., Haas, B. J., Howell, J. M., Khouri, H., Koo, H., Mann, D. J., Norimine, J., Paulsen, I. T., Radune, D., Ren, Q., Smith, R. K., Jr., Suarez, C. E., White, O., Wortman, J. R., Knowles, D. P., Jr., McElwain, T. F., and Nene, V. M. (2007) Genome sequence of *Babesia bovis* and comparative analysis of apicomplexan hemoprotozoa. *PLoS Pathog* **3**, 1401-1413
60. Okano, K., Takada, N., Kobayashi, M., and Maekawa, H. (1994) cDNA structure and characterization of a kinesin-like protein from the silkworm *Bombyx mori*. *Insect Mol Biol* **3**, 195-200
61. Wang, Q., Teng, J., Shen, B., Zhang, W., Guo, Y., Su, X., Zhang, C., Yu, A. C., and Chen, J. (2010) Characterization of kinesin-like proteins in silkworm posterior silk gland cells. *Cell Res* **20**, 713-727
62. Bovine Genome Sequencing and Analysis Consortium, Elsik, C. G., Tellam, R. L., Worley, K. C., Gibbs, R. A., Muzny, D. M., Weinstock, G. M., Adelson, D. L., Eichler, E. E., Elntitski, L., Guigo, R., Hamernik, D. L., Kappes, S. M., Lewin, H. A., Lynn, D. J., Nicholas, F. W., Raymond, A., Rijnkels, M., Skow, L. C., Zdobnov, E. M., Schook, L., Womack, J., Alioto, T., Antonarakis, S. E., Astashyn, A., Chapple, C. E., Chen, H. C., Chrast, J., Camara, F., Ermolaeva, O., Henrichsen, C. N., Hlavina, W., Kapustin, Y., Kiryutin, B., Kitts, P., Kokocinski, F., Landrum, M., Maglott, D., Pruitt, K., Sapozhnikov, V., Searle, S. M., Solovyev, V., Souvorov, A., Ucla, C., Wyss, C., Anzola, J. M., Gerlach, D., Elhaik, E., Graur, D., Reese, J. T., Edgar, R. C., McEwan, J. C., Payne, G. M., Raison, J. M., Junier, T., Kriventseva, E. V., Eyraes, E., Plass, M., Donthu, R., Larkin, D. M., Reecy, J., Yang, M. Q., Chen, L., Cheng, Z., Chitko-McKown, C. G., Liu, G. E., Matukumalli, L. K., Song, J., Zhu, B., Bradley, D. G., Brinkman, F. S., Lau, L. P., Whiteside, M. D., Walker, A., Wheeler, T. T., Casey, T., German, J. B., Lemay, D. G., Maqbool, N. J., Molenaar, A. J., Seo, S., Stothard, P., Baldwin, C. L., Baxter, R., Brinkmeyer-Langford, C. L., Brown, W. C., Childers, C. P., Connelley, T., Ellis, S. A., Fritz, K., Glass, E. J., Herzig, C. T., Iivanainen, A., Lahmers, K. K., Bennett, A. K., Dickens, C. M., Gilbert, J. G., Hagen, D. E., Salih, H., Aerts, J., Caetano, A. R., Dalrymple, B., Garcia, J. F., Gill, C. A., Hiendleder, S. G., Memili, E., Spurlock, D., Williams, J. L., Alexander, L., Brownstein, M. J., Guan, L., Holt, R. A., Jones, S. J., Marra, M. A., Moore, R., Moore, S. S., Roberts, A., Taniguchi, M., Waterman, R. C., Chacko, J., Chandrabose, M. M., Cree, A., Dao, M. D., Dinh, H. H., Gabisi, R. A., Hines, S., Hume, J., Jhangiani, S. N., Joshi, V., Kovar, C. L., Lewis, L. R., Liu, Y. S., Lopez, J., Morgan, M. B., Nguyen, N. B., Okwuonu, G. O., Ruiz, S. J., Santibanez, J., Wright, R. A., Buhay, C., Ding, Y., Dugan-Rocha, S., Herdandez, J., Holder, M., Sabo, A., Egan, A., Goodell, J., Wilczek-Boney, K., Fowler, G. R., Hitchens, M. E., Lozado, R. J., Moen, C., Steffen, D., Warren, J. T., Zhang, J., Chiu, R., Schein, J. E., Durbin, K. J., Havlak, P., Jiang, H., Liu, Y., Qin, X., Ren, Y., Shen, Y., Song, H., Bell, S. N., Davis, C., Johnson, A. J., Lee, S., Nazareth, L. V., Patel, B. M.,

- Pu, L. L., Vattathil, S., Williams, R. L., Jr., Curry, S., Hamilton, C., Sodergren, E., Wheeler, D. A., Barris, W., Bennett, G. L., Eggen, A., Green, R. D., Harhay, G. P., Hobbs, M., Jann, O., Keele, J. W., Kent, M. P., Lien, S., McKay, S. D., McWilliam, S., Ratnakumar, A., Schnabel, R. D., Smith, T., Snelling, W. M., Sonstegard, T. S., Stone, R. T., Sugimoto, Y., Takasuga, A., Taylor, J. F., Van Tassell, C. P., Macneil, M. D., Abatepaulo, A. R., Abbey, C. A., Ahola, V., Almeida, I. G., Amadio, A. F., Anatriello, E., Bahadue, S. M., Biase, F. H., Boldt, C. R., Carroll, J. A., Carvalho, W. A., Cervelatti, E. P., Chacko, E., Chapin, J. E., Cheng, Y., Choi, J., Colley, A. J., de Campos, T. A., De Donato, M., Santos, I. K., de Oliveira, C. J., Deobald, H., Devinoy, E., Donohue, K. E., Dovic, P., Eberlein, A., Fitzsimmons, C. J., Franzin, A. M., Garcia, G. R., Genini, S., Gladney, C. J., Grant, J. R., Greaser, M. L., Green, J. A., Hadsell, D. L., Hakimov, H. A., Halgren, R., Harrow, J. L., Hart, E. A., Hastings, N., Hernandez, M., Hu, Z. L., Ingham, A., Iso-Touru, T., Jamis, C., Jensen, K., Kapetis, D., Kerr, T., Khalil, S. S., Khatib, H., Kolbehdari, D., Kumar, C. G., Kumar, D., Leach, R., Lee, J. C., Li, C., Logan, K. M., Malinverni, R., Marques, E., Martin, W. F., Martins, N. F., Maruyama, S. R., Mazza, R., McLean, K. L., Medrano, J. F., Moreno, B. T., More, D. D., Muntean, C. T., Nandakumar, H. P., Nogueira, M. F., Olsaker, I., Pant, S. D., Panzitta, F., Pastor, R. C., Poli, M. A., Poslusny, N., Rachagani, S., Ranganathan, S., Razpet, A., Riggs, P. K., Rincon, G., Rodriguez-Osorio, N., Rodriguez-Zas, S. L., Romero, N. E., Rosenwald, A., Sando, L., Schmutz, S. M., Shen, L., Sherman, L., Southey, B. R., Lutzow, Y. S., Sweedler, J. V., Tammen, I., Telugu, B. P., Urbanski, J. M., Utsunomiya, Y. T., Verschoor, C. P., Waardenberg, A. J., Wang, Z., Ward, R., Weikard, R., Welsh, T. H., Jr., White, S. N., Wilming, L. G., Wunderlich, K. R., Yang, J., and Zhao, F. Q. (2009) The genome sequence of taurine cattle: a window to ruminant biology and evolution. *Science* **324**, 522-528
63. Zimin, A. V., Delcher, A. L., Florea, L., Kelley, D. R., Schatz, M. C., Puiu, D., Hanrahan, F., Pertea, G., Van Tassell, C. P., Sonstegard, T. S., Marcais, G., Roberts, M., Subramanian, P., Yorke, J. A., and Salzberg, S. L. (2009) A whole-genome assembly of the domestic cow, *Bos taurus*. *Genome biology* **10**, R42
64. Baker, S. A., Freeman, K., Luby-Phelps, K., Pazour, G. J., and Besharse, J. C. (2003) IFT20 links kinesin II with a mammalian intraflagellar transport complex that is conserved in motile flagella and sensory cilia. *J Biol Chem* **278**, 34211-34218
65. Amselem, J., Cuomo, C. A., van Kan, J. A., Viaud, M., Benito, E. P., Couloux, A., Coutinho, P. M., de Vries, R. P., Dyer, P. S., Fillinger, S., Fournier, E., Gout, L., Hahn, M., Kohn, L., Lapalu, N., Plummer, K. M., Pradier, J. M., Quevillon, E., Sharon, A., Simon, A., ten Have, A., Tudzynski, B., Tudzynski, P., Wincker, P., Andrew, M., Anthouard, V., Beever, R. E., Beffa, R., Benoit, I., Bouzid, O., Brault, B., Chen, Z., Choquer, M., Collemare, J., Cotton, P., Danchin, E. G., Da Silva, C., Gautier, A., Giraud, C., Giraud, T., Gonzalez, C., Grossetete, S., Guldener, U., Henrissat, B., Howlett, B. J., Kodira, C., Kretschmer, M., Lappartient, A., Leroch, M., Levis, C., Mauceli, E., Neuveglise, C., Oeser, B., Pearson, M., Poulain, J., Poussereau, N., Quesneville, H., Rascle, C., Schumacher, J., Segurens, B., Sexton, A., Silva, E., Sirven, C., Soanes, D. M., Talbot, N. J., Templeton, M., Yandava, C., Yarden, O., Zeng, Q., Rollins, J. A., Lebrun, M. H., and Dickman, M. (2011) Genomic analysis of the necrotrophic fungal pathogens *Sclerotinia sclerotiorum* and *Botrytis cinerea*. *PLoS Genet* **7**, e1002230
66. Patel, N., Thierry-Mieg, D., and Mancillas, J. R. (1993) Cloning by insertional mutagenesis of a cDNA encoding *Caenorhabditis elegans* kinesin heavy chain. *Proc Natl Acad Sci U.S.A.* **90**, 9181-9185
67. (1998) Genome sequence of the nematode *C. elegans*: a platform for investigating biology. *Science* **282**, 2012-2018
68. Otsuka, A. J., Jeyaprakash, A., Garcia-Anoveros, J., Tang, L. Z., Fisk, G., Hartshorne, T., Franco, R., and Born, T. (1991) The *C. elegans* unc-104 gene encodes a putative kinesin heavy chain-like protein. *Neuron* **6**, 113-122

69. Tabish, M., Siddiqui, Z. K., Nishikawa, K., and Siddiqui, S. S. (1995) Exclusive expression of *C. elegans* *osm-3* kinesin gene in chemosensory neurons open to the external environment. *J Mol Biol* **247**, 377-389
70. Tait, E., Simon, M. C., King, S., Brown, A. J., Gow, N. A., and Shaw, D. J. (1997) A *Candida albicans* genome project: cosmid contigs, physical mapping, and gene isolation. *Fungal Genet Biol* **21**, 308-314
71. Walther, Z., Vashishtha, M., and Hall, J. L. (1994) The *Chlamydomonas* FLA10 gene encodes a novel kinesin-homologous protein. *J Cell Biol* **126**, 175-188
72. Bernstein, M., Beech, P. L., Katz, S. G., and Rosenbaum, J. L. (1994) A new kinesin-like protein (Klp1) localized to a single microtubule of the *Chlamydomonas* flagellum. *J Cell Biol* **125**, 1313-1326
73. Dymek, E. E., Goduti, D., Kramer, T., and Smith, E. F. (2006) A kinesin-like calmodulin-binding protein in *Chlamydomonas*: evidence for a role in cell division and flagellar functions. *J Cell Sci* **119**, 3107-3116
74. Wordeman, L., and Mitchison, T. J. (1995) Identification and partial characterization of mitotic centromere-associated kinesin, a kinesin-related protein that associates with centromeres during mitosis. *J Cell Biol* **128**, 95-104
75. Kuriyama, R., Kofron, M., Essner, R., Kato, T., Dragas-Granoic, S., Omoto, C. K., and Khodjakov, A. (1995) Characterization of a minus end-directed kinesin-like motor protein from cultured mammalian cells. *J Cell Biol* **129**, 1049-1059
76. Abrahamsen, M. S., Templeton, T. J., Enomoto, S., Abrahante, J. E., Zhu, G., Lancto, C. A., Deng, M., Liu, C., Widmer, G., Tzipori, S., Buck, G. A., Xu, P., Bankier, A. T., Dear, P. H., Konfortov, B. A., Spriggs, H. F., Iyer, L., Anantharaman, V., Aravind, L., and Kapur, V. (2004) Complete genome sequence of the apicomplexan, *Cryptosporidium parvum*. *Science* **304**, 441-445
77. Deleu, W., Gonzalez, V., Monfort, A., Bendahmane, A., Puigdomenech, P., Arus, P., and Garcia-Mas, J. (2007) Structure of two melon regions reveals high microsynteny with sequenced plant species. *Mol Genet Genomics* **278**, 611-622
78. Tay, S. Y., Ingham, P. W., and Roy, S. (2005) A homologue of the *Drosophila* kinesin-like protein Costal2 regulates Hedgehog signal transduction in the vertebrate embryo. *Development* **132**, 625-634
79. Humphries, M., Johnson, C., Howden, P., Wright, D., and Raisen, C. (2009) The *Danio rerio* Sequencing Project Wellcome Trust Sanger Institute, Hinxton. Direct submission to EMBL/GenBank/DDBJ databases
80. Strausberg, R. L., Feingold, E. A., Grouse, L. H., Derge, J. G., Klausner, R. D., Collins, F. S., Wagner, L., Shenmen, C. M., Schuler, G. D., Altschul, S. F., Zeeberg, B., Buetow, K. H., Schaefer, C. F., Bhat, N. K., Hopkins, R. F., Jordan, H., Moore, T., Max, S. I., Wang, J., Hsieh, F., Diatchenko, L., Marusina, K., Farmer, A. A., Rubin, G. M., Hong, L., Stapleton, M., Soares, M. B., Bonaldo, M. F., Casavant, T. L., Scheetz, T. E., Brownstein, M. J., Usdin, T. B., Toshiyuki, S., Carninci, P., Prange, C., Raha, S. S., Loquellano, N. A., Peters, G. J., Abramson, R. D., Mullahy, S. J., Bosak, S. A., McEwan, P. J., McKernan, K. J., Malek, J. A., Gunaratne, P. H., Richards, S., Worley, K. C., Hale, S., Garcia, A. M., Gay, L. J., Hulyk, S. W., Villalon, D. K., Muzny, D. M., Sodergren, E. J., Lu, X., Gibbs, R. A., Fahey, J., Helton, E., Ketteman, M., Madan, A., Rodrigues, S., Sanchez, A., Whiting, M., Young, A. C., Shevchenko, Y., Bouffard, G. G., Blakesley, R. W., Touchman, J. W., Green, E. D., Dickson, M. C., Rodriguez, A. C., Grimwood, J., Schmutz, J., Myers, R. M., Butterfield, Y. S., Krzywinski, M. I., Skalska, U., Smailus, D. E., Schnerch, A., Schein, J. E., Jones, S. J., and Marra, M. A. (2002) Generation and initial analysis of more than 15,000 full-length human and mouse cDNA sequences. *Proc Natl Acad Sci U.S.A.* **99**, 16899-16903

81. Insinna, C., Pathak, N., Perkins, B., Drummond, I., and Besharse, J. C. (2008) The homodimeric kinesin, Kif17, is essential for vertebrate photoreceptor sensory outer segment development. *Dev Biol* **316**, 160-170
82. Eichinger, L., Pachebat, J. A., Glockner, G., Rajandream, M. A., Sugang, R., Berriman, M., Song, J., Olsen, R., Szafranski, K., Xu, Q., Tunggal, B., Kummerfeld, S., Madera, M., Konfortov, B. A., Rivero, F., Bankier, A. T., Lehmann, R., Hamlin, N., Davies, R., Gaudet, P., Fey, P., Pilcher, K., Chen, G., Saunders, D., Sodergren, E., Davis, P., Kerhornou, A., Nie, X., Hall, N., Anjard, C., Hemphill, L., Bason, N., Farbrother, P., Desany, B., Just, E., Morio, T., Rost, R., Churcher, C., Cooper, J., Haydock, S., van Driessche, N., Cronin, A., Goodhead, I., Muzny, D., Mourier, T., Pain, A., Lu, M., Harper, D., Lindsay, R., Hauser, H., James, K., Quiles, M., Madan Babu, M., Saito, T., Buchrieser, C., Wardroper, A., Felder, M., Thangavelu, M., Johnson, D., Knights, A., Louseged, H., Mungall, K., Oliver, K., Price, C., Quail, M. A., Urushihara, H., Hernandez, J., Rabbinoiwtsch, E., Steffen, D., Sanders, M., Ma, J., Kohara, Y., Sharp, S., Simmonds, M., Spiegler, S., Tivey, A., Sugano, S., White, B., Walker, D., Woodward, J., Winckler, T., Tanaka, Y., Shaulsky, G., Schleicher, M., Weinstock, G., Rosenthal, A., Cox, E. C., Chisholm, R. L., Gibbs, R., Loomis, W. F., Platzer, M., Kay, R. R., Williams, J., Dear, P. H., Noegel, A. A., Barrell, B., and Kuspa, A. (2005) The genome of the social amoeba *Dictyostelium discoideum*. *Nature* **435**, 43-57
83. Kollmar, M., and Glockner, G. (2003) Identification and phylogenetic analysis of *Dictyostelium discoideum* kinesin proteins. *BMC genomics* **4**, 47
84. Iwai, S., Ishiji, A., Mabuchi, I., and Sutoh, K. (2004) A novel actin-bundling kinesin-related protein from *Dictyostelium discoideum*. *J Biol Chem* **279**, 4696-4704
85. de Hostos, E. L., McCaffrey, G., Sugang, R., Pierce, D. W., and Vale, R. D. (1998) A developmentally regulated kinesin-related motor protein from *Dictyostelium discoideum*. *Mol Biol Cell* **9**, 2093-2106
86. Pollock, N., de Hostos, E. L., Turck, C. W., and Vale, R. D. (1999) Reconstitution of membrane transport powered by a novel dimeric kinesin motor of the Unc104/KIF1A family purified from *Dictyostelium*. *J Cell Biol* **147**, 493-506
87. Endow, S. A., Henikoff, S., and Soler-Niedziela, L. (1990) Mediation of meiotic and early mitotic chromosome segregation in *Drosophila* by a protein related to kinesin. *Nature* **345**, 81-83
88. Zhang, P., Knowles, B. A., Goldstein, L. S., and Hawley, R. S. (1990) A kinesin-like protein required for distributive chromosome segregation in *Drosophila*. *Cell* **62**, 1053-1062
89. Stewart, R. J., Pesavento, P. A., Woerpel, D. N., and Goldstein, L. S. (1991) Identification and partial characterization of six members of the kinesin superfamily in *Drosophila*. *Proc Natl Acad Sci U.S.A.* **88**, 8470-8474
90. Adams, M. D., Celniker, S. E., Holt, R. A., Evans, C. A., Gocayne, J. D., Amanatides, P. G., Scherer, S. E., Li, P. W., Hoskins, R. A., Galle, R. F., George, R. A., Lewis, S. E., Richards, S., Ashburner, M., Henderson, S. N., Sutton, G. G., Wortman, J. R., Yandell, M. D., Zhang, Q., Chen, L. X., Brandon, R. C., Rogers, Y. H., Blazej, R. G., Champe, M., Pfeiffer, B. D., Wan, K. H., Doyle, C., Baxter, E. G., Helt, G., Nelson, C. R., Gabor, G. L., Abril, J. F., Agbayani, A., An, H. J., Andrews-Pfannkoch, C., Baldwin, D., Ballew, R. M., Basu, A., Baxendale, J., Bayraktaroglu, L., Beasley, E. M., Beeson, K. Y., Benos, P. V., Berman, B. P., Bhandari, D., Bolshakov, S., Borkova, D., Botchan, M. R., Bouck, J., Brokstein, P., Brottier, P., Burtis, K. C., Busam, D. A., Butler, H., Cadieu, E., Center, A., Chandra, I., Cherry, J. M., Cawley, S., Dahlke, C., Davenport, L. B., Davies, P., de Pablos, B., Delcher, A., Deng, Z., Mays, A. D., Dew, I., Dietz, S. M., Dodson, K., Doup, L. E., Downes, M., Dugan-Rocha, S., Dunkov, B. C., Dunn, P., Durbin, K. J., Evangelista, C. C., Ferraz, C., Ferriera, S., Fleischmann, W., Fosler, C., Gabrielian, A. E., Garg, N. S., Gelbart, W. M., Glasser, K., Glodek, A., Gong, F., Gorrell, J. H., Gu, Z., Guan, P., Harris, M., Harris, N. L., Harvey, D., Heiman, T. J., Hernandez, J. R., Houck, J., Hostin, D., Houston, K. A., Howland, T. J., Wei, M. H., Ibegwam, C., Jalali, M., Kalush, F., Karpen, G. H., Ke, Z., Kennison, J. A., Ketchum, K. A., Kimmel, B. E., Kodira, C. D., Kraft, C.,

- Kravitz, S., Kulp, D., Lai, Z., Lasko, P., Lei, Y., Levitsky, A. A., Li, J., Li, Z., Liang, Y., Lin, X., Liu, X., Mattei, B., McIntosh, T. C., McLeod, M. P., McPherson, D., Merkulov, G., Milshina, N. V., Mobarry, C., Morris, J., Moshrefi, A., Mount, S. M., Moy, M., Murphy, B., Murphy, L., Muzny, D. M., Nelson, D. L., Nelson, D. R., Nelson, K. A., Nixon, K., Nusskern, D. R., Pacleb, J. M., Palazzolo, M., Pittman, G. S., Pan, S., Pollard, J., Puri, V., Reese, M. G., Reinert, K., Remington, K., Saunders, R. D., Scheeler, F., Shen, H., Shue, B. C., Siden-Kiamos, I., Simpson, M., Skupski, M. P., Smith, T., Spier, E., Spradling, A. C., Stapleton, M., Strong, R., Sun, E., Svirskas, R., Tector, C., Turner, R., Venter, E., Wang, A. H., Wang, X., Wang, Z. Y., Wassarman, D. A., Weinstock, G. M., Weissenbach, J., Williams, S. M., Woodage, T., Worley, K. C., Wu, D., Yang, S., Yao, Q. A., Ye, J., Yeh, R. F., Zaveri, J. S., Zhan, M., Zhang, G., Zhao, Q., Zheng, L., Zheng, X. H., Zhong, F. N., Zhong, W., Zhou, X., Zhu, S., Zhu, X., Smith, H. O., Gibbs, R. A., Myers, E. W., Rubin, G. M., and Venter, J. C. (2000) The genome sequence of *Drosophila melanogaster*. *Science* **287**, 2185-2195
91. Yucel, J. K., Marszalek, J. D., McIntosh, J. R., Goldstein, L. S., Cleveland, D. W., and Philp, A. V. (2000) CENP-meta, an essential kinetochore kinesin required for the maintenance of metaphase chromosome alignment in *Drosophila*. *J Cell Biol* **150**, 1-11
  92. Shi, W., Stampas, A., Zapata, C., and Baker, N. E. (2003) The pineapple eye gene is required for survival of *Drosophila* imaginal disc cells. *Genetics* **165**, 1869-1879
  93. Hoskins, R. A., Carlson, J. W., Kennedy, C., Acevedo, D., Evans-Holm, M., Frise, E., Wan, K. H., Park, S., Mendez-Lago, M., Rossi, F., Villasante, A., Dimitri, P., Karpen, G. H., and Celniker, S. E. (2007) Sequence finishing and mapping of *Drosophila melanogaster* heterochromatin. *Science* **316**, 1625-1628
  94. Yang, J. T., Laymon, R. A., and Goldstein, L. S. (1989) A three-domain structure of kinesin heavy chain revealed by DNA sequence and microtubule binding analyses. *Cell* **56**, 879-889
  95. Heck, M. M., Pereira, A., Pesavento, P., Yannoni, Y., Spradling, A. C., and Goldstein, L. S. (1993) The kinesin-like protein KLP61F is essential for mitosis in *Drosophila*. *J Cell Biol* **123**, 665-679
  96. Pesavento, P. A., Stewart, R. J., and Goldstein, L. S. (1994) Characterization of the KLP68D kinesin-like protein in *Drosophila*: possible roles in axonal transport. *J Cell Biol* **127**, 1041-1048
  97. Sisson, J. C., Ho, K. S., Suyama, K., and Scott, M. P. (1997) Costal2, a novel kinesin-related protein in the Hedgehog signaling pathway. *Cell* **90**, 235-245
  98. Richards, S., Liu, Y., Bettencourt, B. R., Hradecky, P., Letovsky, S., Nielsen, R., Thornton, K., Hubisz, M. J., Chen, R., Meisel, R. P., Couronne, O., Hua, S., Smith, M. A., Zhang, P., Liu, J., Bussemaker, H. J., van Batenburg, M. F., Howells, S. L., Scherer, S. E., Sodergren, E., Matthews, B. B., Crosby, M. A., Schroeder, A. J., Ortiz-Barrientos, D., Rives, C. M., Metzker, M. L., Muzny, D. M., Scott, G., Steffen, D., Wheeler, D. A., Worley, K. C., Havlak, P., Durbin, K. J., Egan, A., Gill, R., Hume, J., Morgan, M. B., Miner, G., Hamilton, C., Huang, Y., Waldron, L., Verduzco, D., Clerc-Blankenburg, K. P., Dubchak, I., Noor, M. A., Anderson, W., White, K. P., Clark, A. G., Schaeffer, S. W., Gelbart, W., Weinstock, G. M., and Gibbs, R. A. (2005) Comparative genome sequencing of *Drosophila pseudoobscura*: chromosomal, gene, and cis-element evolution. *Genome Res* **15**, 1-18
  99. Requena, N., Alberti-Segui, C., Winzenburg, E., Horn, C., Schliwa, M., Philippsen, P., Liese, R., and Fischer, R. (2001) Genetic evidence for a microtubule-destabilizing effect of conventional kinesin and analysis of its consequences for the control of nuclear distribution in *Aspergillus nidulans*. *Mol Microbiol* **42**, 121-132
  100. Rischitor, P. E., Konzack, S., and Fischer, R. (2004) The Kip3-like kinesin KipB moves along microtubules and determines spindle position during synchronized mitoses in *Aspergillus nidulans* hyphae. *Eukaryot Cell* **3**, 632-645
  101. Enos, A. P., and Morris, N. R. (1990) Mutation of a gene that encodes a kinesin-like protein blocks nuclear division in *A. nidulans*. *Cell* **60**, 1019-1027



102. Wade, C. M., Giulotto, E., Sigurdsson, S., Zoli, M., Gnerre, S., Imsland, F., Lear, T. L., Adelson, D. L., Bailey, E., Bellone, R. R., Blocker, H., Distl, O., Edgar, R. C., Garber, M., Leeb, T., Mauceli, E., MacLeod, J. N., Penedo, M. C., Raison, J. M., Sharpe, T., Vogel, J., Andersson, L., Antczak, D. F., Biagi, T., Binns, M. M., Chowdhary, B. P., Coleman, S. J., Della Valle, G., Fryc, S., Guerin, G., Hasegawa, T., Hill, E. W., Jurka, J., Kiialainen, A., Lindgren, G., Liu, J., Magnani, E., Mickelson, J. R., Murray, J., Nergadze, S. G., Onofrio, R., Pedroni, S., Piras, M. F., Raudsepp, T., Rocchi, M., Roed, K. H., Ryder, O. A., Searle, S., Skow, L., Swinburne, J. E., Syvanen, A. C., Tozaki, T., Valberg, S. J., Vaudin, M., White, J. R., Zody, M. C., Lander, E. S., and Lindblad-Toh, K. (2009) Genome sequence, comparative analysis, and population genetics of the domestic horse. *Science* **326**, 865-867
103. Wang, S. Z., and Adler, R. (1994) A developmentally regulated basic-leucine zipper-like gene and its expression in embryonic retina and lens. *Proc Natl Acad Sci U.S.A.* **91**, 1351-1355
104. Caldwell, R. B., Kierzek, A. M., Arakawa, H., Bezzubov, Y., Zaim, J., Fiedler, P., Kutter, S., Blagodatski, A., Kostovska, D., Koter, M., Plachy, J., Carninci, P., Hayashizaki, Y., and Buerstedde, J. M. (2005) Full-length cDNAs from chicken bursal lymphocytes to facilitate gene function analysis. *Genome Biol* **6**, R6
105. Miller, M. M., Bacon, L. D., Hala, K., Hunt, H. D., Ewald, S. J., Kaufman, J., Zoorob, R., and Briles, W. E. (2004) 2004 Nomenclature for the chicken major histocompatibility (B and Y) complex. *Immunogenetics* **56**, 261-279
106. Schoch, C. L., Aist, J. R., Yoder, O. C., and Gillian Turgeon, B. (2003) A complete inventory of fungal kinesins in representative filamentous ascomycetes. *Fungal Genet Biol* **39**, 1-15
107. Xu, T., Sun, X., Jiang, S., Ren, D., and Liu, G. (2007) Cotton GhKCH2, a plant-specific kinesin, is low-affinitive and nucleotide-independent as binding to microtubule. *J Biochem Mol Biol* **40**, 723-730
108. Navone, F., Niclas, J., Hom-Booher, N., Sparks, L., Bernstein, H. D., McCaffrey, G., and Vale, R. D. (1992) Cloning and expression of a human kinesin heavy chain gene: interaction of the COOH-terminal domain with cytoplasmic microtubules in transfected CV-1 cells. *J Cell Biol* **117**, 1263-1275
109. Sardella, M., Navone, F., Rocchi, M., Rubartelli, A., Viggiano, L., Vignali, G., Consalez, G. G., Sitia, R., and Cabibbo, A. (1998) KIF3C, a novel member of the kinesin superfamily: sequence, expression, and mapping to human chromosome 2 at 2p23. *Genomics* **47**, 405-408
110. Nagase, T., Ishikawa, K., Nakajima, D., Ohira, M., Seki, N., Miyajima, N., Tanaka, A., Kotani, H., Nomura, N., and Ohara, O. (1997) Prediction of the coding sequences of unidentified human genes. VII. The complete sequences of 100 new cDNA clones from brain which can code for large proteins *in vitro*. *DNA Res* **4**, 141-150
111. Nagase, T., Ishikawa, K., Miyajima, N., Tanaka, A., Kotani, H., Nomura, N., and Ohara, O. (1998) Prediction of the coding sequences of unidentified human genes. IX. The complete sequences of 100 new cDNA clones from brain which can code for large proteins *in vitro*. *DNA Res* **5**, 31-39
112. Tokai, N., Fujimoto-Nishiyama, A., Toyoshima, Y., Yonemura, S., Tsukita, S., Inoue, J., and Yamamota, T. (1996) Kid, a novel kinesin-like DNA binding protein, is localized to chromosomes and the mitotic spindle. *EMBO J* **15**, 457-467
113. Janitz, K., Wild, A., Beck, S., Savasta, S., Beluffi, G., Ziegler, A., and Volz, A. (1999) Genomic organization of the HSET locus and the possible association of HLA-linked genes with immotile cilia syndrome (ICS). *Immunogenetics* **49**, 644-652
114. Okamoto, S., Matsushima, M., and Nakamura, Y. (1998) Identification, genomic organization, and alternative splicing of KNSL3, a novel human gene encoding a kinesin-like protein. *Cytogenet Cell Genet* **83**, 25-29
115. Kim, I. G., Jun, D. Y., Sohn, U., and Kim, Y. H. (1997) Cloning and expression of human mitotic centromere-associated kinesin gene. *Biochim Biophys Acta* **1359**, 181-186

116. Hanada, T., Lin, L., Tibaldi, E. V., Reinherz, E. L., and Chishti, A. H. (2000) GAKIN, a novel kinesin-like protein associates with the human homologue of the *Drosophila* discs large tumor suppressor in T lymphocytes. *J Biol Chem* **275**, 28774-28784
117. Nomura, N., Nagase, T., Miyajima, N., Sazuka, T., Tanaka, A., Sato, S., Seki, N., Kawarabayasi, Y., Ishikawa, K., and Tabata, S. (1994) Prediction of the coding sequences of unidentified human genes. II. The coding sequences of 40 new genes (KIAA0041-KIAA0080) deduced by analysis of cDNA clones from human cell line KG-1. *DNA Res* **1**, 223-229
118. Gerhard, D. S., Wagner, L., Feingold, E. A., Shenmen, C. M., Grouse, L. H., Schuler, G., Klein, S. L., Old, S., Rasooly, R., Good, P., Guyer, M., Peck, A. M., Derge, J. G., Lipman, D., Collins, F. S., Jang, W., Sherry, S., Feolo, M., Misquitta, L., Lee, E., Rotmistrovsky, K., Greenhut, S. F., Schaefer, C. F., Buetow, K., Bonner, T. I., Haussler, D., Kent, J., Kiekhaus, M., Furey, T., Brent, M., Prange, C., Schreiber, K., Shapiro, N., Bhat, N. K., Hopkins, R. F., Hsie, F., Driscoll, T., Soares, M. B., Casavant, T. L., Scheetz, T. E., Brownstein, M. J., Usdin, T. B., Toshiyuki, S., Carninci, P., Piao, Y., Dudekula, D. B., Ko, M. S., Kawakami, K., Suzuki, Y., Sugano, S., Gruber, C. E., Smith, M. R., Simmons, B., Moore, T., Waterman, R., Johnson, S. L., Ruan, Y., Wei, C. L., Mathavan, S., Gunaratne, P. H., Wu, J., Garcia, A. M., Hulyk, S. W., Fuh, E., Yuan, Y., Sneed, A., Kowis, C., Hodgson, A., Muzny, D. M., McPherson, J., Gibbs, R. A., Fahey, J., Helton, E., Kettelman, M., Madan, A., Rodrigues, S., Sanchez, A., Whiting, M., Madari, A., Young, A. C., Wetherby, K. D., Granite, S. J., Kwong, P. N., Brinkley, C. P., Pearson, R. L., Bouffard, G. G., Blakesly, R. W., Green, E. D., Dickson, M. C., Rodriguez, A. C., Grimwood, J., Schmutz, J., Myers, R. M., Butterfield, Y. S., Griffith, M., Griffith, O. L., Krzywinski, M. I., Liao, N., Morin, R., Palmquist, D., Petrescu, A. S., Skalska, U., Smailus, D. E., Stott, J. M., Schnerch, A., Schein, J. E., Jones, S. J., Holt, R. A., Baross, A., Marra, M. A., Clifton, S., Makowski, K. A., Bosak, S., Malek, J., and MGC Project Team. (2004) The status, quality, and expansion of the NIH full-length cDNA project: the Mammalian Gene Collection (MGC). *Genome Res* **14**, 2121-2127
119. Gregory, S. G., Barlow, K. F., McLay, K. E., Kaul, R., Swarbreck, D., Dunham, A., Scott, C. E., Howe, K. L., Woodfine, K., Spencer, C. C., Jones, M. C., Gillson, C., Searle, S., Zhou, Y., Kokocinski, F., McDonald, L., Evans, R., Phillips, K., Atkinson, A., Cooper, R., Jones, C., Hall, R. E., Andrews, T. D., Lloyd, C., Ainscough, R., Almeida, J. P., Ambrose, K. D., Anderson, F., Andrew, R. W., Ashwell, R. I., Aubin, K., Babbage, A. K., Bagguley, C. L., Bailey, J., Beasley, H., Bethel, G., Bird, C. P., Bray-Allen, S., Brown, J. Y., Brown, A. J., Buckley, D., Burton, J., Bye, J., Carder, C., Chapman, J. C., Clark, S. Y., Clarke, G., Clee, C., Cobley, V., Collier, R. E., Corby, N., Coville, G. J., Davies, J., Deadman, R., Dunn, M., Earthrowl, M., Ellington, A. G., Errington, H., Frankish, A., Frankland, J., French, L., Garner, P., Garnett, J., Gay, L., Ghorri, M. R., Gibson, R., Gilby, L. M., Gillett, W., Glithero, R. J., Grafham, D. V., Griffiths, C., Griffiths-Jones, S., Grocock, R., Hammond, S., Harrison, E. S., Hart, E., Haugen, E., Heath, P. D., Holmes, S., Holt, K., Howden, P. J., Hunt, A. R., Hunt, S. E., Hunter, G., Isherwood, J., James, R., Johnson, C., Johnson, D., Joy, A., Kay, M., Kershaw, J. K., Kibukawa, M., Kimberley, A. M., King, A., Knights, A. J., Lad, H., Laird, G., Lawlor, S., Leongamornlert, D. A., Lloyd, D. M., Loveland, J., Lovell, J., Lush, M. J., Lyne, R., Martin, S., Mashreghi-Mohammadi, M., Matthews, L., Matthews, N. S., McLaren, S., Milne, S., Mistry, S., Moore, M. J., Nickerson, T., O'Dell, C. N., Oliver, K., Palmeiri, A., Palmer, S. A., Parker, A., Patel, D., Pearce, A. V., Peck, A. I., Pelan, S., Phelps, K., Phillimore, B. J., Plumb, R., Rajan, J., Raymond, C., Rouse, G., Saenphimmachak, C., Sehra, H. K., Sheridan, E., Shownkeen, R., Sims, S., Skuce, C. D., Smith, M., Steward, C., Subramanian, S., Sycamore, N., Tracey, A., Tromans, A., Van Helmond, Z., Wall, M., Wallis, J. M., White, S., Whitehead, S. L., Wilkinson, J. E., Willey, D. L., Williams, H., Wilming, L., Wray, P. W., Wu, Z., Coulson, A., Vaudin, M., Sulston, J. E., Durbin, R., Hubbard, T., Wooster, R., Dunham, I., Carter, N. P., McVean, G., Ross, M. T., Harrow, J., Olson, M. V., Beck, S., Rogers, J., Bentley, D. R., Banerjee, R., Bryant, S. P., Burford, D. C., Burrill, W. D., Clegg, S. M., Dhami, P., Dovey, O., Faulkner, L. M., Gribble, S. M., Langford, C. F., Pandian, R. D.,

- Porter, K. M., and Prigmore, E. (2006) The DNA sequence and biological annotation of human chromosome 1. *Nature* **441**, 315-321
120. Yamada, K., Andrews, C., Chan, W. M., McKeown, C. A., Magli, A., de Berardinis, T., Loewenstein, A., Lazar, M., O'Keefe, M., Letson, R., London, A., Ruttum, M., Matsumoto, N., Saito, N., Morris, L., Del Monte, M., Johnson, R. H., Uyama, E., Houtman, W. A., de Vries, B., Carlow, T. J., Hart, B. L., Krawiecki, N., Shoffner, J., Vogel, M. C., Katowitz, J., Goldstein, S. M., Levin, A. V., Sener, E. C., Ozturk, B. T., Akarsu, A. N., Brodsky, M. C., Hanisch, F., Cruse, R. P., Zubcov, A. A., Robb, R. M., Roggenkaemper, P., Gottlob, I., Kowal, L., Battu, R., Traboulsi, E. I., Franceschini, P., Newlin, A., Demer, J. L., and Engle, E. C. (2003) Heterozygous mutations of the kinesin KIF21A in congenital fibrosis of the extraocular muscles type 1 (CFEOM1). *Nat Genet* **35**, 318-321
121. Nagase, T., Kikuno, R., Nakayama, M., Hirosawa, M., and Ohara, O. (2000) Prediction of the coding sequences of unidentified human genes. XVIII. The complete sequences of 100 new cDNA clones from brain which code for large proteins *in vitro*. *DNA Res* **7**, 273-281
122. Seki, N., Ohira, M., Nagase, T., Ishikawa, K., Miyajima, N., Nakajima, D., Nomura, N., and Ohara, O. (1997) Characterization of cDNA clones in size-fractionated cDNA libraries from human brain. *DNA Res* **4**, 345-349
123. Luboshits, G., and Benayahu, D. (2005) MS-KIF18A, new kinesin; structure and cellular expression. *Gene* **351**, 19-28
124. Oduru, S., Campbell, J. L., Karri, S., Hendry, W. J., Khan, S. A., and Williams, S. C. (2003) Gene discovery in the hamster: a comparative genomics approach for gene annotation by sequencing of hamster testis cDNAs. *BMC genomics* **4**, 22
125. Sueishi, M., Takagi, M., and Yoneda, Y. (2000) The forkhead-associated domain of Ki-67 antigen interacts with the novel kinesin-like protein Hk1p2. *J Biol Chem* **275**, 28888-28892
126. Humphray, S. J., Oliver, K., Hunt, A. R., Plumb, R. W., Loveland, J. E., Howe, K. L., Andrews, T. D., Searle, S., Hunt, S. E., Scott, C. E., Jones, M. C., Ainscough, R., Almeida, J. P., Ambrose, K. D., Ashwell, R. I., Babbage, A. K., Babbage, S., Bagguley, C. L., Bailey, J., Banerjee, R., Barker, D. J., Barlow, K. F., Bates, K., Beasley, H., Beasley, O., Bird, C. P., Bray-Allen, S., Brown, A. J., Brown, J. Y., Burford, D., Burrill, W., Burton, J., Carder, C., Carter, N. P., Chapman, J. C., Chen, Y., Clarke, G., Clark, S. Y., Clee, C. M., Clegg, S., Collier, R. E., Corby, N., Crosier, M., Cummings, A. T., Davies, J., Dhami, P., Dunn, M., Dutta, I., Dyer, L. W., Earthrowl, M. E., Faulkner, L., Fleming, C. J., Frankish, A., Frankland, J. A., French, L., Fricker, D. G., Garner, P., Garnett, J., Ghori, J., Gilbert, J. G., Glison, C., Grafham, D. V., Gribble, S., Griffiths, C., Griffiths-Jones, S., Grocock, R., Guy, J., Hall, R. E., Hammond, S., Harley, J. L., Harrison, E. S., Hart, E. A., Heath, P. D., Henderson, C. D., Hopkins, B. L., Howard, P. J., Howden, P. J., Huckle, E., Johnson, C., Johnson, D., Joy, A. A., Kay, M., Keenan, S., Kershaw, J. K., Kimberley, A. M., King, A., Knights, A., Laird, G. K., Langford, C., Lawlor, S., Leongamornlert, D. A., Leversha, M., Lloyd, C., Lloyd, D. M., Lovell, J., Martin, S., Mashreghi-Mohammadi, M., Matthews, L., McLaren, S., McLay, K. E., McMurray, A., Milne, S., Nickerson, T., Nisbett, J., Nordsiek, G., Pearce, A. V., Peck, A. I., Porter, K. M., Pandian, R., Pelan, S., Phillimore, B., Povey, S., Ramsey, Y., Rand, V., Scharfe, M., Sehra, H. K., Shownkeen, R., Sims, S. K., Skuce, C. D., Smith, M., Steward, C. A., Swarbreck, D., Sycamore, N., Tester, J., Thorpe, A., Tracey, A., Tromans, A., Thomas, D. W., Wall, M., Wallis, J. M., West, A. P., Whitehead, S. L., Willey, D. L., Williams, S. A., Wilming, L., Wray, P. W., Young, L., Ashurst, J. L., Coulson, A., Blocker, H., Durbin, R., Sulston, J. E., Hubbard, T., Jackson, M. J., Bentley, D. R., Beck, S., Rogers, J., and Dunham, I. (2004) DNA sequence and analysis of human chromosome 9. *Nature* **429**, 369-374
127. Blangy, A., Lane, H. A., d'Herin, P., Harper, M., Kress, M., and Nigg, E. A. (1995) Phosphorylation by p34cdc2 regulates spindle association of human Eg5, a kinesin-related motor essential for bipolar spindle formation *in vivo*. *Cell* **83**, 1159-1169

128. Nagai, M., Ichimiya, S., Ozaki, T., Seki, N., Mihara, M., Furuta, S., Ohira, M., Tomioka, N., Nomura, N., Sakiyama, S., Kubo, O., Takakura, K., Hori, T., and Nakagawara, A. (2000) Identification of the full-length KIAA0591 gene encoding a novel kinesin-related protein which is mapped to the neuroblastoma suppressor gene locus at 1p36.2. *Int J Oncol* **16**, 907-916
129. Dorner, C., Ciossek, T., Muller, S., Moller, P. H., Ullrich, A., and Lammers, R. (1998) Characterization of KIF1C, a new kinesin-like protein involved in vesicle transport from the Golgi apparatus to the endoplasmic reticulum. *J Biol Chem* **273**, 20267-20275
130. Jamain, S., Quach, H., Fellous, M., and Bourgeron, T. (2001) Identification of the human KIF13A gene homologous to *Drosophila* kinesin-73 and candidate for schizophrenia. *Genomics* **74**, 36-44
131. Furlong, R. A., Zhou, C. Y., Ferguson-Smith, M. A., and Affara, N. A. (1996) Characterization of a kinesin-related gene ATSV, within the tuberous sclerosis locus (TSC1) candidate region on chromosome 9Q34. *Genomics* **33**, 421-429
132. Hoang, E. H., Whitehead, J. L., Dose, A. C., and Burnside, B. (1998) Cloning of a novel C-terminal kinesin (KIFC3) that maps to human chromosome 16q13-q21 and thus is a candidate gene for Bardet-Biedl syndrome. *Genomics* **52**, 219-222
133. Niclas, J., Navone, F., Hom-Booher, N., and Vale, R. D. (1994) Cloning and localization of a conventional kinesin motor expressed exclusively in neurons. *Neuron* **12**, 1059-1072
134. Oh, S., Hahn, H., Torrey, T. A., Shin, H., Choi, W., Lee, Y. M., Morse, H. C., and Kim, W. (2000) Identification of the human homologue of mouse KIF4, a kinesin superfamily motor protein. *Biochim Biophys Acta* **1493**, 219-224
135. Debernardi, S., Fontanella, E., De Gregorio, L., Pierotti, M. A., and Delia, D. (1997) Identification of a novel human kinesin-related gene (HK2) by the cDNA differential display technique. *Genomics* **42**, 67-73
136. Heilig, R., Eckenberg, R., Petit, J. L., Fonknechten, N., Da Silva, C., Cattolico, L., Levy, M., Barbe, V., de Berardinis, V., Ureta-Vidal, A., Pelletier, E., Vico, V., Anthonard, V., Rowen, L., Madan, A., Qin, S., Sun, H., Du, H., Pepin, K., Artiguenave, F., Robert, C., Cruaud, C., Bruls, T., Jaillon, O., Friedlander, L., Samson, G., Brottier, P., Cure, S., Segurens, B., Aniere, F., Samain, S., Crespeau, H., Abbasi, N., Aiach, N., Boscus, D., Dickhoff, R., Dors, M., Dubois, I., Friedman, C., Gouyvenoux, M., James, R., Mairey-Estrada, B., Mangenot, S., Martins, N., Menard, M., Oztas, S., Ratcliffe, A., Shaffer, T., Trask, B., Vacherie, B., Bellemere, C., Belser, C., Besnard-Gonnet, M., Bartol-Mavel, D., Boutard, M., Briez-Silla, S., Combette, S., Dufosse-Laurent, V., Ferron, C., Lechaplais, C., Louesse, C., Muselet, D., Magdelenat, G., Pateau, E., Petit, E., Sirvain-Trukniewicz, P., Trybou, A., Vega-Czarny, N., Bataille, E., Bluet, E., Bordelais, I., Dubois, M., Dumont, C., Guerin, T., Haffray, S., Hammadi, R., Muanga, J., Pellouin, V., Robert, D., Wunderle, E., Gauguier, G., Roy, A., Sainte-Marthe, L., Verdier, J., Verdier-Discala, C., Hillier, L., Fulton, L., McPherson, J., Matsuda, F., Wilson, R., Scarpelli, C., Gyapay, G., Wincker, P., Saurin, W., Quetier, F., Waterston, R., Hood, L., and Weissenbach, J. (2003) The DNA sequence and analysis of human chromosome 14. *Nature* **421**, 601-607
137. Nagase, T., Kikuno, R., Ishikawa, K. I., Hirosawa, M., and Ohara, O. (2000) Prediction of the coding sequences of unidentified human genes. XVI. The complete sequences of 150 new cDNA clones from brain which code for large proteins *in vitro*. *DNA Res* **7**, 65-73
138. Yen, T. J., Li, G., Schaar, B. T., Szilak, I., and Cleveland, D. W. (1992) CENP-E is a putative kinetochore motor that accumulates just before mitosis. *Nature* **359**, 536-539
139. Clark, H. F., Gurney, A. L., Abaya, E., Baker, K., Baldwin, D., Brush, J., Chen, J., Chow, B., Chui, C., Crowley, C., Currell, B., Deuel, B., Dowd, P., Eaton, D., Foster, J., Grimaldi, C., Gu, Q., Hass, P. E., Heldens, S., Huang, A., Kim, H. S., Klimowski, L., Jin, Y., Johnson, S., Lee, J., Lewis, L., Liao, D., Mark, M., Robbie, E., Sanchez, C., Schoenfeld, J., Seshagiri, S., Simmons, L., Singh, J., Smith, V., Stinson, J., Vagts, A., Vandlen, R., Watanabe, C., Wieand, D., Woods, K., Xie, M. H., Yansura, D., Yi, S., Yu, G., Yuan, J., Zhang, M., Zhang, Z., Goddard, A., Wood, W. I., Godowski, P., and Gray, A. (2003) The secreted protein discovery initiative (SPDI), a

- large-scale effort to identify novel human secreted and transmembrane proteins: a bioinformatics assessment. *Genome Res* **13**, 2265-2270
140. Whitehead, J. L., Wang, S. Y., Bost-Usinger, L., Hoang, E., Frazer, K. A., and Burnside, B. (1999) Photoreceptor localization of the KIF3A and KIF3B subunits of the heterotrimeric microtubule motor kinesin II in vertebrate retina. *Exp Eye Res* **69**, 491-503
  141. Peacock, C. S., Seeger, K., Harris, D., Murphy, L., Ruiz, J. C., Quail, M. A., Peters, N., Adlem, E., Tivey, A., Aslett, M., Kerhornou, A., Ivens, A., Fraser, A., Rajandream, M. A., Carver, T., Norbertczak, H., Chillingworth, T., Hance, Z., Jagels, K., Moule, S., Ormond, D., Rutter, S., Squares, R., Whitehead, S., Rabbinowitsch, E., Arrowsmith, C., White, B., Thurston, S., Bringaud, F., Baldauf, S. L., Faulconbridge, A., Jeffares, D., Depledge, D. P., Oyola, S. O., Hilley, J. D., Brito, L. O., Tosi, L. R., Barrell, B., Cruz, A. K., Mottram, J. C., Smith, D. F., and Berriman, M. (2007) Comparative genomic analysis of three *Leishmania* species that cause diverse human disease. *Nat Genet* **39**, 839-847
  142. Burns, J. M., Jr., Shreffler, W. G., Benson, D. R., Ghalib, H. W., Badaro, R., and Reed, S. G. (1993) Molecular characterization of a kinesin-related antigen of *Leishmania chagasi* that detects specific antibody in African and American visceral leishmaniasis. *Proc Natl Acad Sci U.S.A.* **90**, 775-779
  143. Gerald, N. J., Coppens, I., and Dwyer, D. M. (2007) Molecular dissection and expression of the LdK39 kinesin in the human pathogen, *Leishmania donovani*. *Mol Microbiol* **63**, 962-979
  144. Ivens, A. C., Lewis, S. M., Bagherzadeh, A., Zhang, L., Chan, H. M., and Smith, D. F. (1998) A physical map of the *Leishmania major* Friedlin genome. *Genome Res* **8**, 135-145
  145. Myler, P. J., Audleman, L., deVos, T., Hixson, G., Kiser, P., Lemley, C., Magness, C., Rickel, E., Sisk, E., Sunkin, S., Swartzell, S., Westlake, T., Bastien, P., Fu, G., Ivens, A., and Stuart, K. (1999) *Leishmania major* Friedlin chromosome 1 has an unusual distribution of protein-coding genes. *Proc Natl Acad Sci U.S.A.* **96**, 2902-2906
  146. Butler, G., Rasmussen, M. D., Lin, M. F., Santos, M. A., Sakthikumar, S., Munro, C. A., Rheinbay, E., Grabherr, M., Forche, A., Reedy, J. L., Agrafioti, I., Arnaud, M. B., Bates, S., Brown, A. J., Brunke, S., Costanzo, M. C., Fitzpatrick, D. A., de Groot, P. W., Harris, D., Hoyer, L. L., Hube, B., Klis, F. M., Kodira, C., Lennard, N., Logue, M. E., Martin, R., Neiman, A. M., Nikolaou, E., Quail, M. A., Quinn, J., Santos, M. C., Schmitzberger, F. F., Sherlock, G., Shah, P., Silverstein, K. A., Skrzypek, M. S., Soll, D., Staggs, R., Stansfield, I., Stumpf, M. P., Sudbery, P. E., Srikantha, T., Zeng, Q., Berman, J., Berriman, M., Heitman, J., Gow, N. A., Lorenz, M. C., Birren, B. W., Kellis, M., and Cuomo, C. A. (2009) Evolution of pathogenicity and sexual reproduction in eight *Candida* genomes. *Nature* **459**, 657-662
  147. Kosik, K. S., Orecchio, L. D., Schnapp, B., Inouye, H., and Neve, R. L. (1990) The primary structure and analysis of the squid kinesin heavy chain. *J Biol Chem* **265**, 3278-3283
  148. Osada, N., Hida, M., Kusuda, J., Tanuma, R., Hirata, M., Suto, Y., Hirai, M., Terao, K., Sugano, S., and Hashimoto, K. (2002) Cynomolgus monkey testicular cDNAs for discovery of novel human genes in the human genome sequence. *BMC genomics* **3**, 36
  149. Osada, N., Hirata, M., Tanuma, R., Kusuda, J., Hida, M., Suzuki, Y., Sugano, S., Gojobori, T., Shen, C. K., Wu, C. I., and Hashimoto, K. (2005) Substitution rate and structural divergence of 5'UTR evolution: comparative analysis between human and cynomolgus monkey cDNAs. *Mol Biol Evol* **22**, 1976-1982
  150. Rhesus Macaque Genome Sequencing and Analysis Consortium, Gibbs, R. A., Rogers, J., Katze, M. G., Bumgarner, R., Weinstock, G. M., Mardis, E. R., Remington, K. A., Strausberg, R. L., Venter, J. C., Wilson, R. K., Batzer, M. A., Bustamante, C. D., Eichler, E. E., Hahn, M. W., Hardison, R. C., Makova, K. D., Miller, W., Milosavljevic, A., Palermo, R. E., Siepel, A., Sikela, J. M., Attaway, T., Bell, S., Bernard, K. E., Buhay, C. J., Chandrabose, M. N., Dao, M., Davis, C., Delehaunty, K. D., Ding, Y., Dinh, H. H., Dugan-Rocha, S., Fulton, L. A., Gabisi, R. A., Garner, T. T., Godfrey, J., Hawes, A. C., Hernandez, J., Hines, S., Holder, M., Hume, J., Jhangiani, S. N., Joshi, V., Khan, Z. M., Kirkness, E. F., Cree, A., Fowler, R. G., Lee, S., Lewis,

- L. R., Li, Z., Liu, Y. S., Moore, S. M., Muzny, D., Nazareth, L. V., Ngo, D. N., Okwuonu, G. O., Pai, G., Parker, D., Paul, H. A., Pfannkoch, C., Pohl, C. S., Rogers, Y. H., Ruiz, S. J., Sabo, A., Santibanez, J., Schneider, B. W., Smith, S. M., Sodergren, E., Svatek, A. F., Utterback, T. R., Vattathil, S., Warren, W., White, C. S., Chinwalla, A. T., Feng, Y., Halpern, A. L., Hillier, L. W., Huang, X., Minx, P., Nelson, J. O., Pepin, K. H., Qin, X., Sutton, G. G., Venter, E., Walenz, B. P., Wallis, J. W., Worley, K. C., Yang, S. P., Jones, S. M., Marra, M. A., Rocchi, M., Schein, J. E., Baertsch, R., Clarke, L., Csuros, M., Glasscock, J., Harris, R. A., Havlak, P., Jackson, A. R., Jiang, H., Liu, Y., Messina, D. N., Shen, Y., Song, H. X., Wylie, T., Zhang, L., Birney, E., Han, K., Konkel, M. K., Lee, J., Smit, A. F., Ullmer, B., Wang, H., Xing, J., Burhans, R., Cheng, Z., Karro, J. E., Ma, J., Raney, B., She, X., Cox, M. J., Demuth, J. P., Dumas, L. J., Han, S. G., Hopkins, J., Karimpour-Fard, A., Kim, Y. H., Pollack, J. R., Vinar, T., Addo-Quaye, C., Degenhardt, J., Denby, A., Hubisz, M. J., Indap, A., Kosiol, C., Lahn, B. T., Lawson, H. A., Marklein, A., Nielsen, R., Vallender, E. J., Clark, A. G., Ferguson, B., Hernandez, R. D., Hirani, K., Kehrer-Sawatzki, H., Kolb, J., Patil, S., Pu, L. L., Ren, Y., Smith, D. G., Wheeler, D. A., Schenck, I., Ball, E. V., Chen, R., Cooper, D. N., Giardine, B., Hsu, F., Kent, W. J., Lesk, A., Nelson, D. L., O'Brien, W. E., Pruffer, K., Stenson, P. D., Wallace, J. C., Ke, H., Liu, X. M., Wang, P., Xiang, A. P., Yang, F., Barber, G. P., Haussler, D., Karolchik, D., Kern, A. D., Kuhn, R. M., Smith, K. E., and Zwiag, A. S. (2007) Evolutionary and biomedical insights from the *rhesus macaque* genome. *Science* **316**, 222-234
151. Dean, R. A., Talbot, N. J., Ebbole, D. J., Farman, M. L., Mitchell, T. K., Orbach, M. J., Thon, M., Kulkarni, R., Xu, J. R., Pan, H., Read, N. D., Lee, Y. H., Carbone, I., Brown, D., Oh, Y. Y., Donofrio, N., Jeong, J. S., Soanes, D. M., Djonovic, S., Kolomiets, E., Rehmeier, C., Li, W., Harding, M., Kim, S., Lebrun, M. H., Bohnert, H., Coughlan, S., Butler, J., Calvo, S., Ma, L. J., Nicol, R., Purcell, S., Nusbaum, C., Galagan, J. E., and Birren, B. W. (2005) The genome sequence of the rice blast fungus *Magnaporthe grisea*. *Nature* **434**, 980-986
152. Cannon, S. B., Sterck, L., Rombauts, S., Sato, S., Cheung, F., Gouzy, J., Wang, X., Mudge, J., Vasdewani, J., Schiex, T., Spannagl, M., Monaghan, E., Nicholson, C., Humphray, S. J., Schoof, H., Mayer, K. F., Rogers, J., Quetier, F., Oldroyd, G. E., Debelle, F., Cook, D. R., Retzel, E. F., Roe, B. A., Town, C. D., Tabata, S., Van de Peer, Y., and Young, N. D. (2006) Legume genome evolution viewed through the *Medicago truncatula* and *Lotus japonicus* genomes. *Proc Natl Acad Sci U.S.A.* **103**, 14959-14964
153. Mikkelsen, T. S., Wakefield, M. J., Aken, B., Amemiya, C. T., Chang, J. L., Duke, S., Garber, M., Gentles, A. J., Goodstadt, L., Heger, A., Jurka, J., Kamal, M., Mauceli, E., Searle, S. M., Sharpe, T., Baker, M. L., Batzer, M. A., Benos, P. V., Belov, K., Clamp, M., Cook, A., Cuff, J., Das, R., Davidow, L., Deakin, J. E., Fazzari, M. J., Glass, J. L., Grabherr, M., Grealley, J. M., Gu, W., Hore, T. A., Huttley, G. A., Kleber, M., Jirtle, R. L., Koina, E., Lee, J. T., Mahony, S., Marra, M. A., Miller, R. D., Nicholls, R. D., Oda, M., Papenfuss, A. T., Parra, Z. E., Pollock, D. D., Ray, D. A., Schein, J. E., Speed, T. P., Thompson, K., VandeBerg, J. L., Wade, C. M., Walker, J. A., Waters, P. D., Webber, C., Weidman, J. R., Xie, X., Zody, M. C., Graves, J. A., Ponting, C. P., Breen, M., Samollow, P. B., Lander, E. S., and Lindblad-Toh, K. (2007) Genome of the marsupial *Monodelphis domestica* reveals innovation in non-coding sequences. *Nature* **447**, 167-177
154. Bost-Usinger, L., Chen, R. J., Hillman, D., Park, H., and Burnside, B. (1997) Multiple kinesin family members expressed in teleost retina and RPE include a novel C-terminal kinesin. *Exp Eye Res* **64**, 781-794
155. Aizawa, H., Sekine, Y., Takemura, R., Zhang, Z., Nangaku, M., and Hirokawa, N. (1992) Kinesin family in murine central nervous system. *J Cell Biol* **119**, 1287-1296
156. Sekine, Y., Okada, Y., Noda, Y., Kondo, S., Aizawa, H., Takemura, R., and Hirokawa, N. (1994) A novel microtubule-based motor protein (KIF4) for organelle transports, whose expression is regulated developmentally. *J Cell Biol* **127**, 187-201

157. Saito, N., Okada, Y., Noda, Y., Kinoshita, Y., Kondo, S., and Hirokawa, N. (1997) KIFC2 is a novel neuron-specific C-terminal type kinesin superfamily motor for dendritic transport of multivesicular body-like organelles. *Neuron* **18**, 425-438
158. Meng, Y. X., Wilson, G. W., Avery, M. C., Varden, C. H., and Balczon, R. (1997) Suppression of the expression of a pancreatic beta-cell form of the kinesin heavy chain by antisense oligonucleotides inhibits insulin secretion from primary cultures of mouse beta-cells. *Endocrinology* **138**, 1979-1987
159. Nitta, R., Okada, Y., and Hirokawa, N. (2008) Structural model for strain-dependent microtubule activation of Mg-ADP release from kinesin. *Nat Struct Mol Biol* **15**, 1067-1075
160. Yamazaki, H., Nakata, T., Okada, Y., and Hirokawa, N. (1995) KIF3A/B: a heterodimeric kinesin superfamily protein that works as a microtubule plus end-directed motor for membrane organelle transport. *J Cell Biol* **130**, 1387-1399
161. Yang, Z., and Goldstein, L. S. (1998) Characterization of the KIF3C neural kinesin-like motor from mouse. *Mol Biol Cell* **9**, 249-261
162. Navolanic, P. M., and Sperry, A. O. (2000) Identification of isoforms of a mitotic motor in mammalian spermatogenesis. *Biol Reprod* **62**, 1360-1369
163. Kato, K. (1990) A collection of cDNA clones with specific expression patterns in mouse brain. *Eur J Neurosci* **2**, 704-711
164. Nangaku, M., Sato-Yoshitake, R., Okada, Y., Noda, Y., Takemura, R., Yamazaki, H., and Hirokawa, N. (1994) KIF1B, a novel microtubule plus end-directed monomeric motor protein for transport of mitochondria. *Cell* **79**, 1209-1220
165. Nakagawa, T., Tanaka, Y., Matsuoka, E., Kondo, S., Okada, Y., Noda, Y., Kanai, Y., and Hirokawa, N. (1997) Identification and classification of 16 new kinesin superfamily (KIF) proteins in mouse genome. *Proc Natl Acad Sci U.S.A.* **94**, 9654-9659
166. Nakagawa, T., Setou, M., Seog, D., Ogasawara, K., Dohmae, N., Takio, K., and Hirokawa, N. (2000) A novel motor, KIF13A, transports mannose-6-phosphate receptor to plasma membrane through direct interaction with AP-1 complex. *Cell* **103**, 569-581
167. Setou, M., Nakagawa, T., Seog, D. H., and Hirokawa, N. (2000) Kinesin superfamily motor protein KIF17 and mLin-10 in NMDA receptor-containing vesicle transport. *Science* **288**, 1796-1802
168. Carninci, P., Kasukawa, T., Katayama, S., Gough, J., Frith, M. C., Maeda, N., Oyama, R., Ravasi, T., Lenhard, B., Wells, C., Kodzius, R., Shimokawa, K., Bajic, V. B., Brenner, S. E., Batalov, S., Forrest, A. R., Zavolan, M., Davis, M. J., Wilming, L. G., Aidinis, V., Allen, J. E., Ambesi-Impiombato, A., Apweiler, R., Aturaliya, R. N., Bailey, T. L., Bansal, M., Baxter, L., Beisel, K. W., Bersano, T., Bono, H., Chalk, A. M., Chiu, K. P., Choudhary, V., Christoffels, A., Clutterbuck, D. R., Crowe, M. L., Dalla, E., Dalrymple, B. P., de Bono, B., Della Gatta, G., di Bernardo, D., Down, T., Engstrom, P., Fagiolini, M., Faulkner, G., Fletcher, C. F., Fukushima, T., Furuno, M., Futaki, S., Gariboldi, M., Georgii-Hemming, P., Gingeras, T. R., Gojobori, T., Green, R. E., Gustincich, S., Harbers, M., Hayashi, Y., Hensch, T. K., Hirokawa, N., Hill, D., Huminiecki, L., Iacono, M., Ikeo, K., Iwama, A., Ishikawa, T., Jakt, M., Kanapin, A., Katoh, M., Kawasaki, Y., Kelso, J., Kitamura, H., Kitano, H., Kollias, G., Krishnan, S. P., Kruger, A., Kummerfeld, S. K., Kurochkin, I. V., Lareau, L. F., Lazarevic, D., Lipovich, L., Liu, J., Lioni, S., McWilliam, S., Madan Babu, M., Madera, M., Marchionni, L., Matsuda, H., Matsuzawa, S., Miki, H., Mignone, F., Miyake, S., Morris, K., Mottagui-Tabar, S., Mulder, N., Nakano, N., Nakauchi, H., Ng, P., Nilsson, R., Nishiguchi, S., Nishikawa, S., Nori, F., Ohara, O., Okazaki, Y., Orlando, V., Pang, K. C., Pavan, W. J., Pavesi, G., Pesole, G., Petrovsky, N., Piazza, S., Reed, J., Reid, J. F., Ring, B. Z., Ringwald, M., Rost, B., Ruan, Y., Salzberg, S. L., Sandelin, A., Schneider, C., Schonbach, C., Sekiguchi, K., Semple, C. A., Seno, S., Sessa, L., Sheng, Y., Shibata, Y., Shimada, H., Shimada, K., Silva, D., Sinclair, B., Sperling, S., Stupka, E., Sugiura, K., Sultana, R., Takenaka, Y., Taki, K., Tammouja, K., Tan, S. L., Tang, S., Taylor, M. S., Tegner, J., Teichmann, S. A., Ueda, H. R., van Nimwegen, E., Verardo, R., Wei, C. L., Yagi, K.,

- Yamanishi, H., Zabarovsky, E., Zhu, S., Zimmer, A., Hide, W., Bult, C., Grimmond, S. M., Teasdale, R. D., Liu, E. T., Brusic, V., Quackenbush, J., Wahlestedt, C., Mattick, J. S., Hume, D. A., Kai, C., Sasaki, D., Tomaru, Y., Fukuda, S., Kanamori-Katayama, M., Suzuki, M., Aoki, J., Arakawa, T., Iida, J., Imamura, K., Itoh, M., Kato, T., Kawaji, H., Kawagashira, N., Kawashima, T., Kojima, M., Kondo, S., Konno, H., Nakano, K., Ninomiya, N., Nishio, T., Okada, M., Plessy, C., Shibata, K., Shiraki, T., Suzuki, S., Tagami, M., Waki, K., Watahiki, A., Okamura-Oho, Y., Suzuki, H., Kawai, J., Hayashizaki, Y., FANTOM Consortium, Group, Riken Genome Exploration Research Group and Genome Science Group (Genome Network Project Core Group). (2005) The transcriptional landscape of the mammalian genome. *Science* **309**, 1559-1563
169. Marszalek, J. R., Weiner, J. A., Farlow, S. J., Chun, J., and Goldstein, L. S. (1999) Novel dendritic kinesin sorting identified by different process targeting of two related kinesins: KIF21A and KIF21B. *J Cell Biol* **145**, 469-479
170. Buster, D. W., Baird, D. H., Yu, W., Solowska, J. M., Chauviere, M., Mazurek, A., Kress, M., and Baas, P. W. (2003) Expression of the mitotic kinesin Kif15 in postmitotic neurons: implications for neuronal migration and development. *J Neurocytol* **32**, 79-96
171. Weaver, B. A., Bonday, Z. Q., Putkey, F. R., Kops, G. J., Silk, A. D., and Cleveland, D. W. (2003) Centromere-associated protein-E is essential for the mammalian mitotic checkpoint to prevent aneuploidy due to single chromosome loss. *J Cell Biol* **162**, 551-563
172. Xia, C., Rahman, A., Yang, Z., and Goldstein, L. S. (1998) Chromosomal localization reveals three kinesin heavy chain genes in mouse. *Genomics* **52**, 209-213
173. Noda, Y., Okada, Y., Saito, N., Setou, M., Xu, Y., Zhang, Z., and Hirokawa, N. (2001) KIFC3, a microtubule minus end-directed motor for the apical transport of annexin XIIIb-associated Triton-insoluble membranes. *J Cell Biol* **155**, 77-88
174. Miki, H., Setou, M., Kaneshiro, K., and Hirokawa, N. (2001) All kinesin superfamily protein, KIF, genes in mouse and human. *Proc Natl Acad Sci U.S.A.* **98**, 7004-7011
175. Wu, Q., Sandrock, T. M., Turgeon, B. G., Yoder, O. C., Wirsal, S. G., and Aist, J. R. (1998) A fungal kinesin required for organelle motility, hyphal growth, and morphogenesis. *Mol Biol Cell* **9**, 89-101
176. Steinberg, G., and Schliwa, M. (1995) The *Neurospora* organelle motor: a distant relative of conventional kinesin with unconventional properties. *Mol Biol Cell* **6**, 1605-1618
177. Wang, W., Takezawa, D., Narasimhulu, S. B., Reddy, A. S., and Poovaiah, B. W. (1996) A novel kinesin-like protein with a calmodulin-binding domain. *Plant Mol Biol* **31**, 87-100
178. Asada, T., Kuriyama, R., and Shibaoka, H. (1997) TKRP125, a kinesin-related protein involved in the centrosome-independent organization of the cytokinetic apparatus in tobacco BY-2 cells. *J Cell Sci* **110** (Pt 2), 179-189
179. Warren, W. C., Hillier, L. W., Marshall Graves, J. A., Birney, E., Ponting, C. P., Grutzner, F., Belov, K., Miller, W., Clarke, L., Chinwalla, A. T., Yang, S. P., Heger, A., Locke, D. P., Miethke, P., Waters, P. D., Veyrunes, F., Fulton, L., Fulton, B., Graves, T., Wallis, J., Puente, X. S., Lopez-Otin, C., Ordonez, G. R., Eichler, E. E., Chen, L., Cheng, Z., Deakin, J. E., Alsop, A., Thompson, K., Kirby, P., Papenfuss, A. T., Wakefield, M. J., Olender, T., Lancet, D., Huttley, G. A., Smit, A. F., Pask, A., Temple-Smith, P., Batzer, M. A., Walker, J. A., Konkel, M. K., Harris, R. S., Whittington, C. M., Wong, E. S., Gemmell, N. J., Buschiazzi, E., Vargas Jentzsch, I. M., Merkel, A., Schmitz, J., Zemann, A., Churakov, G., Kriegs, J. O., Brosius, J., Murchison, E. P., Sachidanandam, R., Smith, C., Hannon, G. J., Tsend-Ayush, E., McMillan, D., Attenborough, R., Rens, W., Ferguson-Smith, M., Lefevre, C. M., Sharp, J. A., Nicholas, K. R., Ray, D. A., Kube, M., Reinhardt, R., Pringle, T. H., Taylor, J., Jones, R. C., Nixon, B., Dacheux, J. L., Niwa, H., Sekita, Y., Huang, X., Stark, A., Kheradpour, P., Kellis, M., Fliccek, P., Chen, Y., Webber, C., Hardison, R., Nelson, J., Hallsworth-Pepin, K., Delehaunty, K., Markovic, C., Minx, P., Feng, Y., Kremitzki, C., Mitreva, M., Glasscock, J., Wylie, T., Wohldmann, P., Thiru, P., Nhan, M. N., Pohl, C. S., Smith, S. M., Hou, S., Nefedov, M., de Jong, P. J., Renfree, M. B., Mardis, E. R., and



- Wilson, R. K. (2008) Genome analysis of the platypus reveals unique signatures of evolution. *Nature* **453**, 175-183
180. International Rice Genome Sequencing Project (2005) The map-based sequence of the rice genome. *Nature* **436**, 793-800
181. Buell, C. R., Yuan, Q., Ouyang, S., Liu, J., Zhu, W., Wang, A., Maiti, R., Haas, B., Wortman, J., Pertea, M., Jones, K. M., Kim, M., Overton, L., Tsitrin, T., Fadrosch, D., Bera, J., Weaver, B., Jin, S., Johri, S., Reardon, M., Webb, K., Hill, J., Moffat, K., Tallon, L., Van Aken, S., Lewis, M., Utterback, T., Feldblyum, T., Zismann, V., Iobst, S., Hsiao, J., de Vazeille, A. R., Salzberg, S. L., White, O., Fraser, C., Yu, Y., Kim, H., Rambo, T., Currie, J., Collura, K., Kernodle-Thompson, S., Wei, F., Kudrna, K., Ammiraju, J. S., Luo, M., Goicoechea, J. L., Wing, R. A., Henry, D., Oates, R., Palmer, M., Pries, G., Saski, C., Simmons, J., Soderlund, C., Nelson, W., de la Bastide, M., Spiegel, L., Nascimento, L., Huang, E., Preston, R., Zutavern, T., Palmer, L., O'Shaughnessy, A., Dike, S., McCombie, W. R., Minx, P., Cordum, H., Wilson, R., Jin, W., Lee, H. R., Jiang, J., Jackson, S., and Rice Chromosome 3 Sequencing Consortium. (2005) Sequence, annotation, and analysis of synteny between rice chromosome 3 and diverged grass species. *Genome Res* **15**, 1284-1291
182. Ohyanagi, H., Tanaka, T., Sakai, H., Shigemoto, Y., Yamaguchi, K., Habara, T., Fujii, Y., Antonio, B. A., Nagamura, Y., Imanishi, T., Ikeo, K., Itoh, T., Gojobori, T., and Sasaki, T. (2006) The Rice Annotation Project Database (RAP-DB): hub for *Oryza sativa* ssp. japonica genome information. *Nucleic Acids Res* **34**, D741-744
183. Feng, Q., Zhang, Y., Hao, P., Wang, S., Fu, G., Huang, Y., Li, Y., Zhu, J., Liu, Y., Hu, X., Jia, P., Zhao, Q., Ying, K., Yu, S., Tang, Y., Weng, Q., Zhang, L., Lu, Y., Mu, J., Zhang, L. S., Yu, Z., Fan, D., Liu, X., Lu, T., Li, C., Wu, Y., Sun, T., Lei, H., Li, T., Hu, H., Guan, J., Wu, M., Zhang, R., Zhou, B., Chen, Z., Chen, L., Jin, Z., Wang, R., Yin, H., Cai, Z., Ren, S., Lv, G., Gu, W., Zhu, G., Tu, Y., Jia, J., Chen, J., Kang, H., Chen, X., Shao, C., Sun, Y., Hu, Q., Zhang, X., Zhang, W., Wang, L., Ding, C., Sheng, H., Gu, J., Chen, S., Ni, L., Zhu, F., Chen, W., Lan, L., Lai, Y., Cheng, Z., Gu, M., Jiang, J., Li, J., Hong, G., Xue, Y., and Han, B. (2002) Sequence and analysis of rice chromosome 4. *Nature* **420**, 316-320
184. Yu, J., Wang, J., Lin, W., Li, S., Li, H., Zhou, J., Ni, P., Dong, W., Hu, S., Zeng, C., Zhang, J., Zhang, Y., Li, R., Xu, Z., Li, X., Zheng, H., Cong, L., Lin, L., Yin, J., Geng, J., Li, G., Shi, J., Liu, J., Lv, H., Li, J., Deng, Y., Ran, L., Shi, X., Wang, X., Wu, Q., Li, C., Ren, X., Li, D., Liu, D., Zhang, X., Ji, Z., Zhao, W., Sun, Y., Zhang, Z., Bao, J., Han, Y., Dong, L., Ji, J., Chen, P., Wu, S., Xiao, Y., Bu, D., Tan, J., Yang, L., Ye, C., Xu, J., Zhou, Y., Yu, Y., Zhang, B., Zhuang, S., Wei, H., Liu, B., Lei, M., Yu, H., Li, Y., Xu, H., Wei, S., He, X., Fang, L., Huang, X., Su, Z., Tong, W., Tong, Z., Ye, J., Wang, L., Lei, T., Chen, C., Chen, H., Huang, H., Zhang, F., Li, N., Zhao, C., Huang, Y., Li, L., Xi, Y., Qi, Q., Li, W., Hu, W., Tian, X., Jiao, Y., Liang, X., Jin, J., Gao, L., Zheng, W., Hao, B., Liu, S., Wang, W., Yuan, L., Cao, M., McDermott, J., Samudrala, R., Wong, G. K., and Yang, H. (2005) The Genomes of *Oryza sativa*: a history of duplications. *PLoS Biol* **3**, e38
185. Palenik, B., Grimwood, J., Aerts, A., Rouze, P., Salamov, A., Putnam, N., Dupont, C., Jorgensen, R., Derelle, E., Rombauts, S., Zhou, K., Otiillar, R., Merchant, S. S., Podell, S., Gaasterland, T., Napoli, C., Gendler, K., Manuell, A., Tai, V., Vallon, O., Piganeau, G., Jancek, S., Heijde, M., Jabbari, K., Bowler, C., Lohr, M., Robbens, S., Werner, G., Dubchak, I., Pazour, G. J., Ren, Q., Paulsen, I., Delwiche, C., Schmutz, J., Rokhsar, D., Van de Peer, Y., Moreau, H., and Grigoriev, I. V. (2007) The tiny eukaryote *Ostreococcus* provides genomic insights into the paradox of plankton speciation. *Proc Natl Acad Sci U S A* **104**, 7705-7710
186. Derelle, E., Ferraz, C., Rombauts, S., Rouze, P., Worden, A. Z., Robbens, S., Partensky, F., Degroevé, S., Echeynie, S., Cooke, R., Saeys, Y., Wuyts, J., Jabbari, K., Bowler, C., Panaud, O., Piegu, B., Ball, S. G., Ral, J. P., Bouquet, F. Y., Piganeau, G., De Baets, B., Picard, A., Delseny, M., Demaille, J., Van de Peer, Y., and Moreau, H. (2006) Genome analysis of the smallest free-

- living eukaryote *Ostreococcus tauri* unveils many unique features. *Proc Natl Acad Sci U.S.A.* **103**, 11647-11652
187. The Chimpanzee Sequencing and Analysis Consortium. (2005) Initial sequence of the chimpanzee genome and comparison with the human genome. *Nature* **437**, 69-87
188. Touitou, I., Lhomond, G., and Pruliere, G. (2001) Boursin, a sea urchin bimC kinesin protein, plays a role in anaphase and cytokinesis. *J Cell Sci* **114**, 481-491
189. Aury, J. M., Jaillon, O., Duret, L., Noel, B., Jubin, C., Porcel, B. M., Segurens, B., Daubin, V., Anthouard, V., Aiach, N., Arnaiz, O., Billaut, A., Beisson, J., Blanc, I., Bouhouche, K., Camara, F., Dharcourt, S., Guigo, R., Gogendeau, D., Katinka, M., Keller, A. M., Kissmehl, R., Klotz, C., Koll, F., Le Mouel, A., Lepere, G., Malinsky, S., Nowacki, M., Nowak, J. K., Plattner, H., Poulain, J., Ruiz, F., Serrano, V., Zagulski, M., Dessen, P., Betermier, M., Weissenbach, J., Scarpelli, C., Schachter, V., Sperling, L., Meyer, E., Cohen, J., and Wincker, P. (2006) Global trends of whole-genome duplications revealed by the ciliate *Paramecium tetraurelia*. *Nature* **444**, 171-178
190. Hane, J. K., Lowe, R. G., Solomon, P. S., Tan, K. C., Schoch, C. L., Spatafora, J. W., Crous, P. W., Kodira, C., Birren, B. W., Galagan, J. E., Torriani, S. F., McDonald, B. A., and Oliver, R. P. (2007) Dothideomycete plant interactions illuminated by genome sequencing and EST analysis of the wheat pathogen *Stagonospora nodorum*. *Plant Cell* **19**, 3347-3368
191. Jeffries, T. W., Grigoriev, I. V., Grimwood, J., Laplaza, J. M., Aerts, A., Salamov, A., Schmutz, J., Lindquist, E., Dehal, P., Shapiro, H., Jin, Y. S., Passoth, V., and Richardson, P. M. (2007) Genome sequence of the lignocellulose-bioconverting and xylose-fermenting yeast *Pichia stipitis*. *Nat Biotechnol* **25**, 319-326
192. Hall, N., Pain, A., Berriman, M., Churcher, C., Harris, B., Harris, D., Mungall, K., Bowman, S., Atkin, R., Baker, S., Barron, A., Brooks, K., Buckee, C. O., Burrows, C., Cherevach, I., Chillingworth, C., Chillingworth, T., Christodoulou, Z., Clark, L., Clark, R., Corton, C., Cronin, A., Davies, R., Davis, P., Dear, P., Dearden, F., Doggett, J., Feltwell, T., Goble, A., Goodhead, I., Gwilliam, R., Hamlin, N., Hance, Z., Harper, D., Hauser, H., Hornsby, T., Holroyd, S., Horrocks, P., Humphray, S., Jagels, K., James, K. D., Johnson, D., Kerhornou, A., Knights, A., Konfortov, B., Kyes, S., Larke, N., Lawson, D., Lennard, N., Line, A., Maddison, M., McLean, J., Mooney, P., Moule, S., Murphy, L., Oliver, K., Ormond, D., Price, C., Quail, M. A., Rabinowitsch, E., Rajandream, M. A., Rutter, S., Rutherford, K. M., Sanders, M., Simmonds, M., Seeger, K., Sharp, S., Smith, R., Squares, R., Squares, S., Stevens, K., Taylor, K., Tivey, A., Unwin, L., Whitehead, S., Woodward, J., Sulston, J. E., Craig, A., Newbold, C., and Barrell, B. G. (2002) Sequence of *Plasmodium falciparum* chromosomes 1, 3-9 and 13. *Nature* **419**, 527-531
193. Carlton, J. M., Adams, J. H., Silva, J. C., Bidwell, S. L., Lorenzi, H., Caler, E., Crabtree, J., Angiuoli, S. V., Merino, E. F., Amedeo, P., Cheng, Q., Coulson, R. M., Crabb, B. S., Del Portillo, H. A., Essien, K., Feldblyum, T. V., Fernandez-Becerra, C., Gilson, P. R., Gueye, A. H., Guo, X., Kang'a, S., Kooij, T. W., Korsinczky, M., Meyer, E. V., Nene, V., Paulsen, I., White, O., Ralph, S. A., Ren, Q., Sargeant, T. J., Salzberg, S. L., Stoeckert, C. J., Sullivan, S. A., Yamamoto, M. M., Hoffman, S. L., Wortman, J. R., Gardner, M. J., Galinski, M. R., Barnwell, J. W., and Fraser-Liggett, C. M. (2008) Comparative genomics of the neglected human malaria parasite *Plasmodium vivax*. *Nature* **455**, 757-763
194. Bloecker, H., Boecher, M., Brandt, P., Mewes, H. W., Weil, B., Amid, C., Osanger, A., Fobo, G., Han, M., and Wiemann, S. (2004) The German cDNA Consortium. MIPS, Neuberger. Direct submission to EMBL/GenBank/DBJ databases
195. Stout, J. R., Rizk, R. S., Kline, S. L., and Walczak, C. E. (2006) Deciphering protein function during mitosis in PtK cells using RNAi. *BMC Cell Biol* **7**, 26
196. Muresan, V., Abramson, T., Lyass, A., Winter, D., Porro, E., Hong, F., Chamberlin, N. L., and Schnapp, B. J. (1998) KIF3C and KIF3A form a novel neuronal heteromeric kinesin that associates with membrane vesicles. *Mol Biol Cell* **9**, 637-652

197. Rogers, K. R., Griffin, M., and Brophy, P. J. (1998) The secretory epithelial cells of the choroid plexus employ a novel kinesin-related protein. *Brain Res Mol Brain Res* **55**, 355
198. Sperry, A. O., and Zhao, L. P. (1996) Kinesin-related proteins in the mammalian testes: candidate motors for meiosis and morphogenesis. *Mol Biol Cell* **7**, 289-305
199. Gibbs, R. A., Weinstock, G. M., Metzker, M. L., Muzny, D. M., Sodergren, E. J., Scherer, S., Scott, G., Steffen, D., Worley, K. C., Burch, P. E., Okwuonu, G., Hines, S., Lewis, L., DeRamo, C., Delgado, O., Dugan-Rocha, S., Miner, G., Morgan, M., Hawes, A., Gill, R., Celera, Holt, R. A., Adams, M. D., Amanatides, P. G., Baden-Tillson, H., Barnstead, M., Chin, S., Evans, C. A., Ferriera, S., Fosler, C., Glodek, A., Gu, Z., Jennings, D., Kraft, C. L., Nguyen, T., Pfannkoch, C. M., Sitter, C., Sutton, G. G., Venter, J. C., Woodage, T., Smith, D., Lee, H. M., Gustafson, E., Cahill, P., Kana, A., Doucette-Stamm, L., Weinstock, K., Fechtel, K., Weiss, R. B., Dunn, D. M., Green, E. D., Blakesley, R. W., Bouffard, G. G., De Jong, P. J., Osoegawa, K., Zhu, B., Marra, M., Schein, J., Bosdet, I., Fjell, C., Jones, S., Krzywinski, M., Mathewson, C., Siddiqui, A., Wye, N., McPherson, J., Zhao, S., Fraser, C. M., Shetty, J., Shatsman, S., Geer, K., Chen, Y., Abramzon, S., Nierman, W. C., Havlak, P. H., Chen, R., Durbin, K. J., Egan, A., Ren, Y., Song, X. Z., Li, B., Liu, Y., Qin, X., Cawley, S., Cooney, A. J., D'Souza, L. M., Martin, K., Wu, J. Q., Gonzalez-Garay, M. L., Jackson, A. R., Kalafus, K. J., McLeod, M. P., Milosavljevic, A., Virk, D., Volkov, A., Wheeler, D. A., Zhang, Z., Bailey, J. A., Eichler, E. E., Tuzun, E., Birney, E., Mongin, E., Ureta-Vidal, A., Woodwark, C., Zdobnov, E., Bork, P., Suyama, M., Torrents, D., Alexandersson, M., Trask, B. J., Young, J. M., Huang, H., Wang, H., Xing, H., Daniels, S., Gietzen, D., Schmidt, J., Stevens, K., Vitt, U., Wingrove, J., Camara, F., Mar Alba, M., Abril, J. F., Guigo, R., Smit, A., Dubchak, I., Rubin, E. M., Couronne, O., Poliakov, A., Hubner, N., Ganten, D., Goesele, C., Hummel, O., Kreitler, T., Lee, Y. A., Monti, J., Schulz, H., Zimdahl, H., Himmelbauer, H., Lehrach, H., Jacob, H. J., Bromberg, S., Gullings-Handley, J., Jensen-Seaman, M. I., Kwitek, A. E., Lazar, J., Pasko, D., Tonellato, P. J., Twigger, S., Ponting, C. P., Duarte, J. M., Rice, S., Goodstadt, L., Beatson, S. A., Emes, R. D., Winter, E. E., Webber, C., Brandt, P., Nyakatura, G., Adetobi, M., Chiaromonte, F., Elnitski, L., Eswara, P., Hardison, R. C., Hou, M., Kolbe, D., Makova, K., Miller, W., Nekrutenko, A., Riemer, C., Schwartz, S., Taylor, J., Yang, S., Zhang, Y., Lindpaintner, K., Andrews, T. D., Caccamo, M., Clamp, M., Clarke, L., Curwen, V., Durbin, R., Eyra, E., Searle, S. M., Cooper, G. M., Batzoglou, S., Brudno, M., Sidow, A., Stone, E. A., Payseur, B. A., Bourque, G., Lopez-Otin, C., Puente, X. S., Chakrabarti, K., Chatterji, S., Dewey, C., Pachter, L., Bray, N., Yap, V. B., Caspi, A., Tesler, G., Pevzner, P. A., Haussler, D., Roskin, K. M., Baertsch, R., Clawson, H., Furey, T. S., Hinrichs, A. S., Karolchik, D., Kent, W. J., Rosenbloom, K. R., Trumbower, H., Weirauch, M., Cooper, D. N., Stenson, P. D., Ma, B., Brent, M., Arumugam, M., Shteynberg, D., Copley, R. R., Taylor, M. S., Riethman, H., Mudunuri, U., Peterson, J., Guyer, M., Felsenfeld, A., Old, S., Mockrin, S., and Collins, F. (2004) Genome sequence of the Brown Norway rat yields insights into mammalian evolution. *Nature* **428**, 493-521
200. Faire, K., Gruber, D., and Bulinski, J. C. (1998) Identification of kinesin-like molecules in myogenic cells. *Eur J Cell Biol* **77**, 27-34
201. Junco, A., Bhullar, B., Tarnasky, H. A., and van der Hoorn, F. A. (2001) Kinesin light-chain KLC3 expression in testis is restricted to spermatids. *Biol Reprod* **64**, 1320-1330
202. Roof, D. M., Meluh, P. B., and Rose, M. D. (1992) Kinesin-related proteins required for assembly of the mitotic spindle. *J Cell Biol* **118**, 95-108
203. Lillie, S. H., and Brown, S. S. (1992) Suppression of a myosin defect by a kinesin-related gene. *Nature* **356**, 358-361
204. Rieger, M., Bruckner, M., Schafer, M., and Muller-Auer, S. (1997) Sequence analysis of 203 kilobases from *Saccharomyces cerevisiae* chromosome VII. *Yeast* **13**, 1077-1090
205. Lukacs, M. F., Harstad, H., Grimholt, U., Beetz-Sargent, M., Cooper, G. A., Reid, L., Bakke, H. G., Phillips, R. B., Miller, K. M., Davidson, W. S., and Koop, B. F. (2007) Genomic organization

- of duplicated major histocompatibility complex class I regions in Atlantic salmon (*Salmo salar*). *BMC Genomics* **8**, 251
206. Hagan, I., and Yanagida, M. (1990) Novel potential mitotic motor protein encoded by the fission yeast *cut7+* gene. *Nature* **347**, 563-566
207. Garcia, M. A., Koonrugsa, N., and Toda, T. (2002) Two kinesin-like Kin I family proteins in fission yeast regulate the establishment of metaphase and the onset of anaphase A. *Curr Biol* **12**, 610-621
208. Brazer, S. C., Williams, H. P., Chappell, T. G., and Cande, W. Z. (2000) A fission yeast kinesin affects Golgi membrane recycling. *Yeast* **16**, 149-166
209. Wood, V., Gwilliam, R., Rajandream, M. A., Lyne, M., Lyne, R., Stewart, A., Sgouros, J., Peat, N., Hayles, J., Baker, S., Basham, D., Bowman, S., Brooks, K., Brown, D., Brown, S., Chillingworth, T., Churcher, C., Collins, M., Connor, R., Cronin, A., Davis, P., Feltwell, T., Fraser, A., Gentles, S., Goble, A., Hamlin, N., Harris, D., Hidalgo, J., Hodgson, G., Holroyd, S., Hornsby, T., Howarth, S., Huckle, E. J., Hunt, S., Jagels, K., James, K., Jones, L., Jones, M., Leather, S., McDonald, S., McLean, J., Mooney, P., Moule, S., Mungall, K., Murphy, L., Niblett, D., Odell, C., Oliver, K., O'Neil, S., Pearson, D., Quail, M. A., Rabinowitsch, E., Rutherford, K., Rutter, S., Saunders, D., Seeger, K., Sharp, S., Skelton, J., Simmonds, M., Squares, R., Squares, S., Stevens, K., Taylor, K., Taylor, R. G., Tivey, A., Walsh, S., Warren, T., Whitehead, S., Woodward, J., Volckaert, G., Aert, R., Robben, J., Grymonprez, B., Weltjens, I., Vanstreels, E., Rieger, M., Schafer, M., Muller-Auer, S., Gabel, C., Fuchs, M., Dusterhoft, A., Fritz, C., Holzer, E., Moestl, D., Hilbert, H., Borzym, K., Langer, I., Beck, A., Lehrach, H., Reinhardt, R., Pohl, T. M., Eger, P., Zimmermann, W., Wedler, H., Wambutt, R., Purnelle, B., Goffeau, A., Cadieu, E., Dreano, S., Gloux, S., Lelaure, V., Mottier, S., Galibert, F., Aves, S. J., Xiang, Z., Hunt, C., Moore, K., Hurst, S. M., Lucas, M., Rochet, M., Gaillardin, C., Tallada, V. A., Garzon, A., Thode, G., Daga, R. R., Cruzado, L., Jimenez, J., Sanchez, M., del Rey, F., Benito, J., Dominguez, A., Revuelta, J. L., Moreno, S., Armstrong, J., Forsburg, S. L., Cerutti, L., Lowe, T., McCombie, W. R., Paulsen, I., Potashkin, J., Shpakovski, G. V., Ussery, D., Barrell, B. G., and Nurse, P. (2002) The genome sequence of *Schizosaccharomyces pombe*. *Nature* **415**, 871-880
210. Browning, H., Hayles, J., Mata, J., Aveline, L., Nurse, P., and McIntosh, J. R. (2000) Tea2p is a kinesin-like protein required to generate polarized growth in fission yeast. *J Cell Biol* **151**, 15-28
211. Reddy, A. S., Narasimhulu, S. B., Safadi, F., and Golovkin, M. (1996) A plant kinesin heavy chain-like protein is a calmodulin-binding protein. *Plant J* **10**, 9-21
212. Wright, B. D., Henson, J. H., Wedaman, K. P., Willy, P. J., Morand, J. N., and Scholey, J. M. (1991) Subcellular localization and sequence of sea urchin kinesin heavy chain: evidence for its association with membranes in the mitotic apparatus and interphase cytoplasm. *J Cell Biol* **113**, 817-833
213. Cole, D. G., Chinn, S. W., Wedaman, K. P., Hall, K., Vuong, T., and Scholey, J. M. (1993) Novel heterotrimeric kinesin-related protein purified from sea urchin eggs. *Nature* **366**, 268-270
214. Rogers, G. C., Chui, K. K., Lee, E. W., Wedaman, K. P., Sharp, D. J., Holland, G., Morris, R. L., and Scholey, J. M. (2000) A kinesin-related protein, KRP(180), positions prometaphase spindle poles during early sea urchin embryonic cell division. *J Cell Biol* **150**, 499-512
215. Grummt, M., Pistor, S., Lottspeich, F., and Schliwa, M. (1998) Cloning and functional expression of a 'fast' fungal kinesin. *FEBS Lett* **427**, 79-84
216. Brown, J. M., Marsala, C., Kosoy, R., and Gaertig, J. (1999) Kinesin-II is preferentially targeted to assembling cilia and is required for ciliogenesis and normal cytokinesis in Tetrahymena. *Mol Biol Cell* **10**, 3081-3096
217. Eisen, J. A., Coyne, R. S., Wu, M., Wu, D., Thiagarajan, M., Wortman, J. R., Badger, J. H., Ren, Q., Amedeo, P., Jones, K. M., Tallon, L. J., Delcher, A. L., Salzberg, S. L., Silva, J. C., Haas, B. J., Majoros, W. H., Farzad, M., Carlton, J. M., Smith, R. K., Jr., Garg, J., Pearlman, R. E., Karrer, K. M., Sun, L., Manning, G., Elde, N. C., Turkewitz, A. P., Asai, D. J., Wilkes, D. E., Wang, Y., Cai, H., Collins, K., Stewart, B. A., Lee, S. R., Wilamowska, K., Weinberg, Z., Ruzzo, W. L.,

- Wloga, D., Gaertig, J., Frankel, J., Tsao, C. C., Gorovsky, M. A., Keeling, P. J., Waller, R. F., Patron, N. J., Cherry, J. M., Stover, N. A., Krieger, C. J., del Toro, C., Ryder, H. F., Williamson, S. C., Barbeau, R. A., Hamilton, E. P., and Orias, E. (2006) Macronuclear genome sequence of the ciliate *Tetrahymena thermophila*, a model eukaryote. *PLoS Biol* **4**, e286
218. Carlton, J. M., Hirt, R. P., Silva, J. C., Delcher, A. L., Schatz, M., Zhao, Q., Wortman, J. R., Bidwell, S. L., Alsmark, U. C., Besteiro, S., Sicheritz-Ponten, T., Noel, C. J., Dacks, J. B., Foster, P. G., Simillion, C., Van de Peer, Y., Miranda-Saavedra, D., Barton, G. J., Westrop, G. D., Muller, S., Dessi, D., Fiori, P. L., Ren, Q., Paulsen, I., Zhang, H., Bastida-Corcuera, F. D., Simoes-Barbosa, A., Brown, M. T., Hayes, R. D., Mukherjee, M., Okumura, C. Y., Schneider, R., Smith, A. J., Vanacova, S., Villalvazo, M., Haas, B. J., Perteua, M., Feldblyum, T. V., Utterback, T. R., Shu, C. L., Osoegawa, K., de Jong, P. J., Hrady, I., Horvathova, L., Zubacova, Z., Dolezal, P., Malik, S. B., Logsdon, J. M., Jr., Henze, K., Gupta, A., Wang, C. C., Dunne, R. L., Upcroft, J. A., Upcroft, P., White, O., Salzberg, S. L., Tang, P., Chiu, C. H., Lee, Y. S., Embley, T. M., Coombs, G. H., Mottram, J. C., Tachezy, J., Fraser-Liggett, C. M., and Johnson, P. J. (2007) Draft genome sequence of the sexually transmitted pathogen *Trichomonas vaginalis*. *Science* **315**, 207-212
219. Dutoya, S., Gibert, S., Lemercier, G., Santarelli, X., Baltz, D., Baltz, T., and Bakalara, N. (2001) A novel C-terminal kinesin is essential for maintaining functional acidocalcisomes in *Trypanosoma brucei*. *J Biol Chem* **276**, 49117-49124
220. Lehmler, C., Steinberg, G., Snetselaar, K. M., Schliwa, M., Kahmann, R., and Bolker, M. (1997) Identification of a motor protein required for filamentous growth in *Ustilago maydis*. *EMBO J* **16**, 3464-3473
221. Velasco, R., Zharkikh, A., Troggio, M., Cartwright, D. A., Cestaro, A., Pruss, D., Pindo, M., Fitzgerald, L. M., Vezzulli, S., Reid, J., Malacarne, G., Iliev, D., Coppola, G., Wardell, B., Micheletti, D., Macalma, T., Facci, M., Mitchell, J. T., Perazzolli, M., Eldredge, G., Gatto, P., Oyzerski, R., Moretto, M., Gutin, N., Stefanini, M., Chen, Y., Segala, C., Davenport, C., Dematte, L., Mraz, A., Battilana, J., Stormo, K., Costa, F., Tao, Q., Si-Ammour, A., Harkins, T., Lackey, A., Perbost, C., Taillon, B., Stella, A., Solovyev, V., Fawcett, J. A., Sterck, L., Vandepoele, K., Grando, S. M., Toppo, S., Moser, C., Lanchbury, J., Bogden, R., Skolnick, M., Sgaramella, V., Bhatnagar, S. K., Fontana, P., Gutin, A., Van de Peer, Y., Salamini, F., and Viola, R. (2007) A high quality draft consensus sequence of the genome of a heterozygous grapevine variety. *PLoS One* **2**, e1326
222. Le Guellec, R., Paris, J., Couturier, A., Roghi, C., and Philippe, M. (1991) Cloning by differential screening of a *Xenopus* cDNA that encodes a kinesin-related protein. *Mol Cell Biol* **11**, 3395-3398
223. Walczak, C. E., Verma, S., and Mitchison, T. J. (1997) XCTK2: a kinesin-related protein that promotes mitotic spindle assembly in *Xenopus laevis* egg extracts. *J Cell Biol* **136**, 859-870
224. Vernos, I., Heasman, J., and Wylie, C. (1993) Multiple kinesin-like transcripts in *Xenopus* oocytes. *Dev Biol* **157**, 232-239
225. De Marco, V., Burkhard, P., Le Bot, N., Vernos, I., and Hoenger, A. (2001) Analysis of heterodimer formation by Xklp3A/B, a newly cloned kinesin-II from *Xenopus laevis*. *EMBO J* **20**, 3370-3379
226. Walczak, C. E., Mitchison, T. J., and Desai, A. (1996) XKCM1: a *Xenopus* kinesin-related protein that regulates microtubule dynamics during mitotic spindle assembly. *Cell* **84**, 37-47
227. Westerholm-Parvinen, A., Vernos, I., and Serrano, L. (2000) Kinesin subfamily UNC104 contains a FHA domain: boundaries and physicochemical characterization. *FEBS Lett* **486**, 285-290
228. Vernos, I., Raats, J., Hirano, T., Heasman, J., Karsenti, E., and Wylie, C. (1995) Xklp1, a chromosomal *Xenopus* kinesin-like protein essential for spindle organization and chromosome positioning. *Cell* **81**, 117-127

229. Klein, S. L., Strausberg, R. L., Wagner, L., Pontius, J., Clifton, S. W., and Richardson, P. (2002) Genetic and genomic tools for *Xenopus* research: The NIH *Xenopus* initiative. *Dev Dyn* **225**, 384-391
230. Boleti, H., Karsenti, E., and Vernos, I. (1996) Xklp2, a novel *Xenopus* centrosomal kinesin-like protein required for centrosome separation during mitosis. *Cell* **84**, 49-59
231. Funabiki, H., and Murray, A. W. (2000) The *Xenopus* chromokinesin Xkid is essential for metaphase chromosome alignment and must be degraded to allow anaphase chromosome movement. *Cell* **102**, 411-424
232. Messitt, T. J., Gagnon, J. A., Kreiling, J. A., Pratt, C. A., Yoon, Y. J., and Mowry, K. L. (2008) Multiple kinesin motors coordinate cytoplasmic RNA transport on a subpopulation of microtubules in *Xenopus* oocytes. *Dev Cell* **15**, 426-436
233. Kim, Y., Heuser, J. E., Waterman, C. M., and Cleveland, D. W. (2008) CENP-E combines a slow, processive motor and a flexible coiled coil to produce an essential motile kinetochore tether. *J Cell Biol* **181**, 411-419
234. Antonio, C., Ferby, I., Wilhelm, H., Jones, M., Karsenti, E., Nebreda, A. R., and Vernos, I. (2000) Xkid, a chromokinesin required for chromosome alignment on the metaphase plate. *Cell* **102**, 425-435
